# Supplementary material for: Unveiling the potential of novel indol-3-yl-phenyl allylidene hydrazine carboximidamide derivatives as AChE/BACE 1 dual inhibitors: a combined in silico, synthesis and in vitro study
Source: Royal Society of Chemistry journal article supplement (doi:10.1039/d4ra04315d), 2024-01-01
Supplement: d4ra04315d1.pdf [file d4ra04315d1.pdf]

## **Supporting Information**

### **Unveiling the potential of novel indol-3-yl-phenyl allylidene hydrazine carboximidamide derivatives as AChE/BACE 1 dual inhibitors: A combined *in-silico*, synthesis and *in-vitro* studies**

Amit Sharma<sup>1</sup>, Santosh Rudrawar<sup>2,3</sup>, Ankita Sharma<sup>4</sup>, Sandip B. Bharate<sup>4</sup>, Hemant R. Jadhav<sup>1\*</sup>

<sup>1</sup>Pharmaceutical Chemistry Research Laboratory, Department of Pharmacy, Birla Institute of Technology and Science Pilani, Pilani Campus, Vidya Vihar, Pilani – 333031 (RJ) India

<sup>2</sup>The Institute for Biomedicine and Glycomics, Griffith University, Gold Coast 4222, Australia

<sup>3</sup>School of Pharmacy and Medical Sciences, Griffith University, Gold Coast 4222, Australia

<sup>4</sup>Natural Products and Medicinal Chemistry Division, CSIR-Indian Institute of Integrative Medicine, Canal Road, Jammu – 181110, India

\*Corresponding author: Tel: +91-1596-255 506; Fax: +91-1596-244183;

**E-mail:** [hemantrj@pilani.bits-pilani.ac.in](mailto:hemantrj@pilani.bits-pilani.ac.in)

$^1\text{H}$  NMR spectrum of compound **1a** in  $\text{DMSO-d}_6$ .

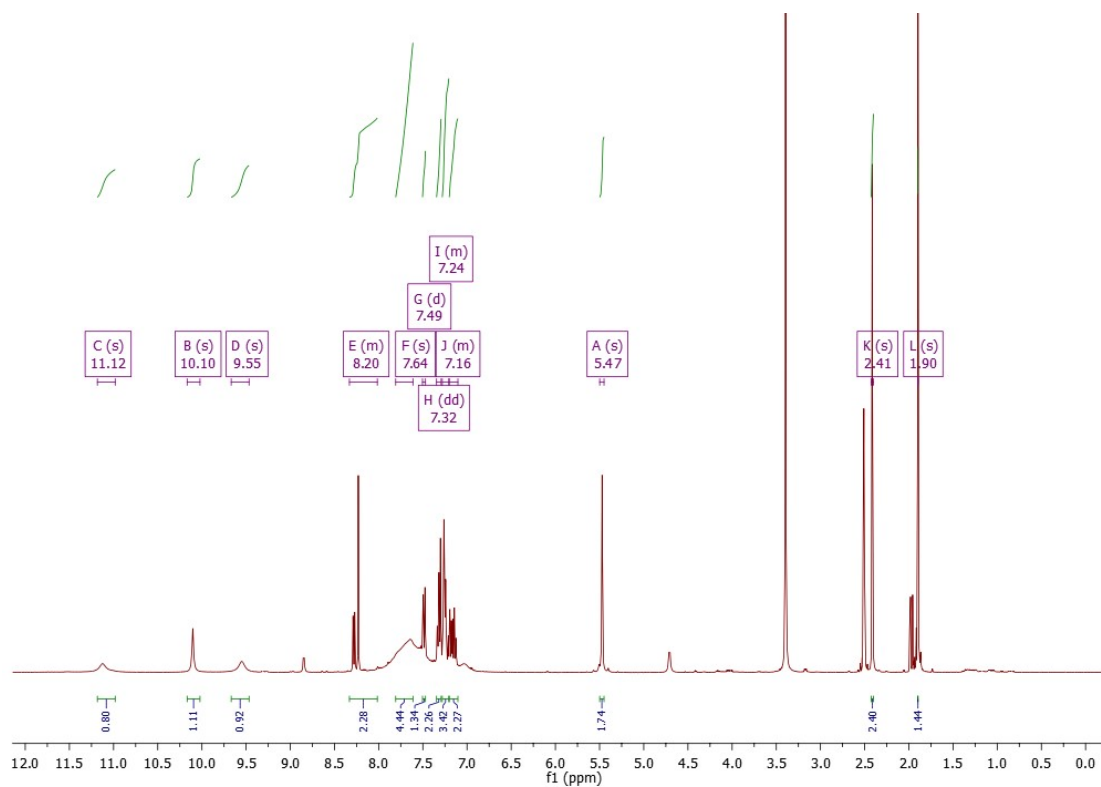

$^{13}\text{C}$  NMR spectrum of compound **1a** in  $\text{DMSO-d}_6$ .

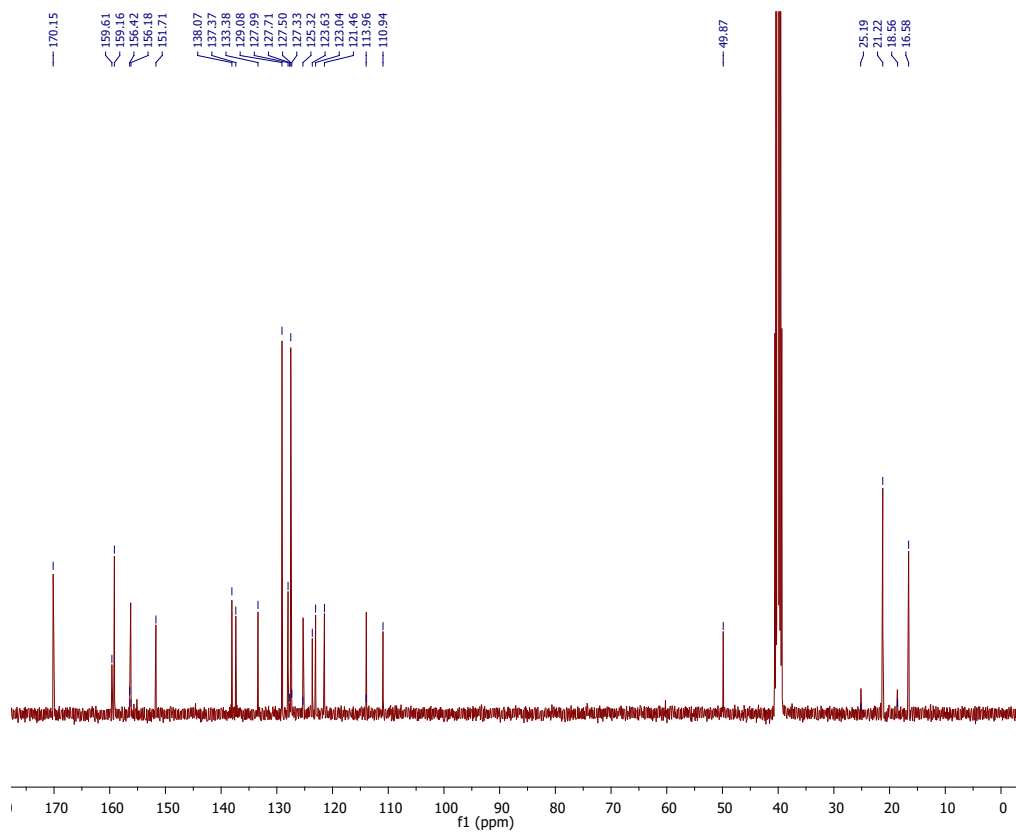

## HRMS spectrum of compound **1a**.

MS Zoomed Spectrum

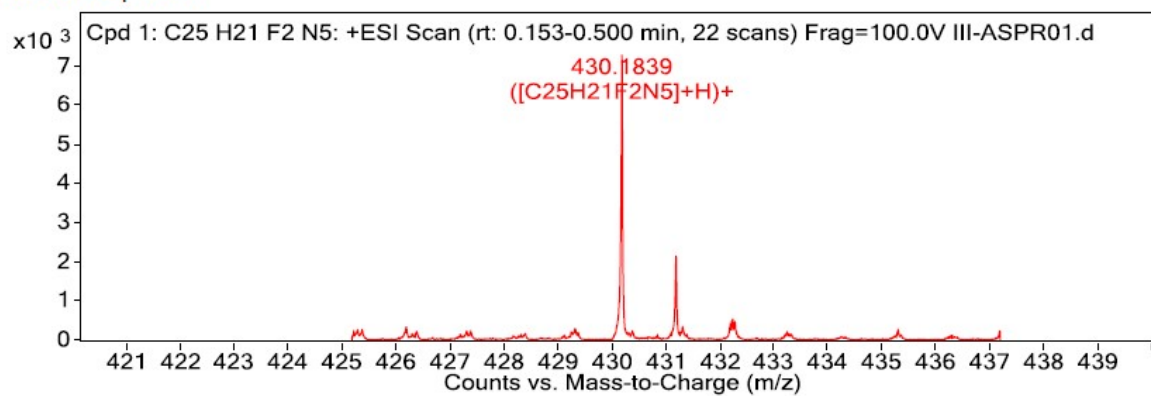

<sup>1</sup>H NMR spectrum of compound **1b** in DMSO-d<sub>6</sub>.

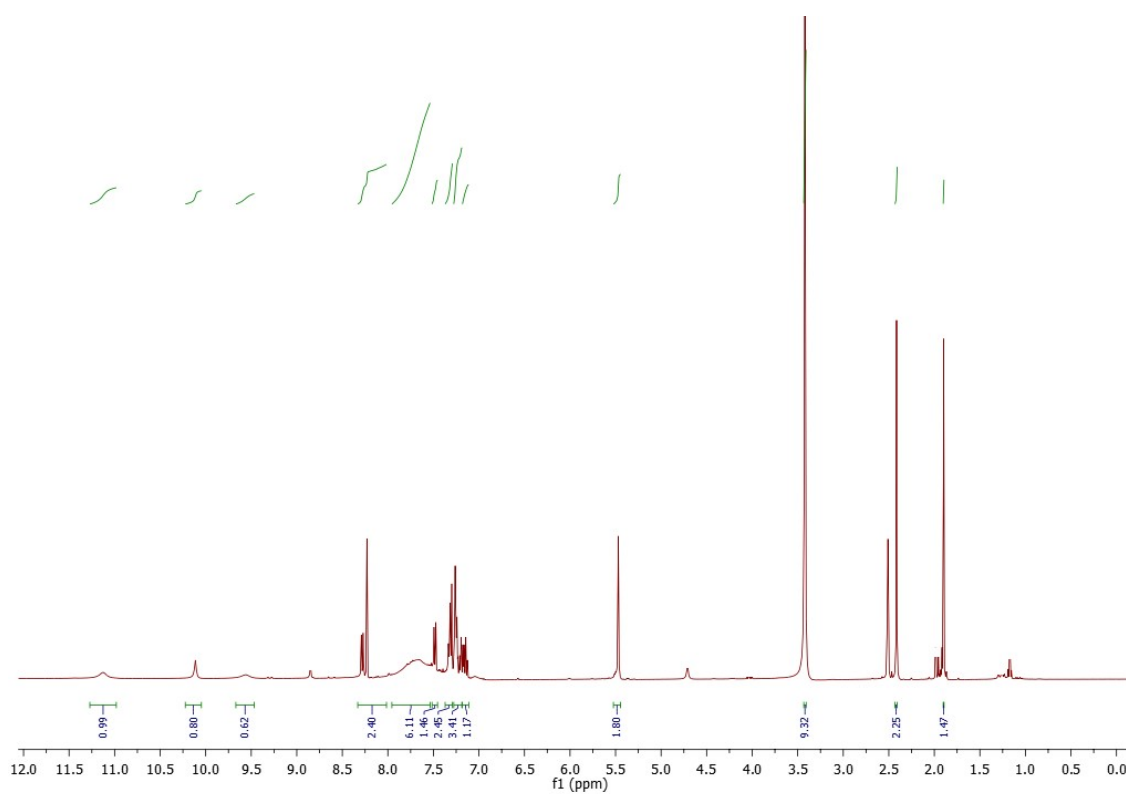

$^{13}\text{C}$  NMR spectrum of compound **1b** in  $\text{DMSO-d}_6$ .

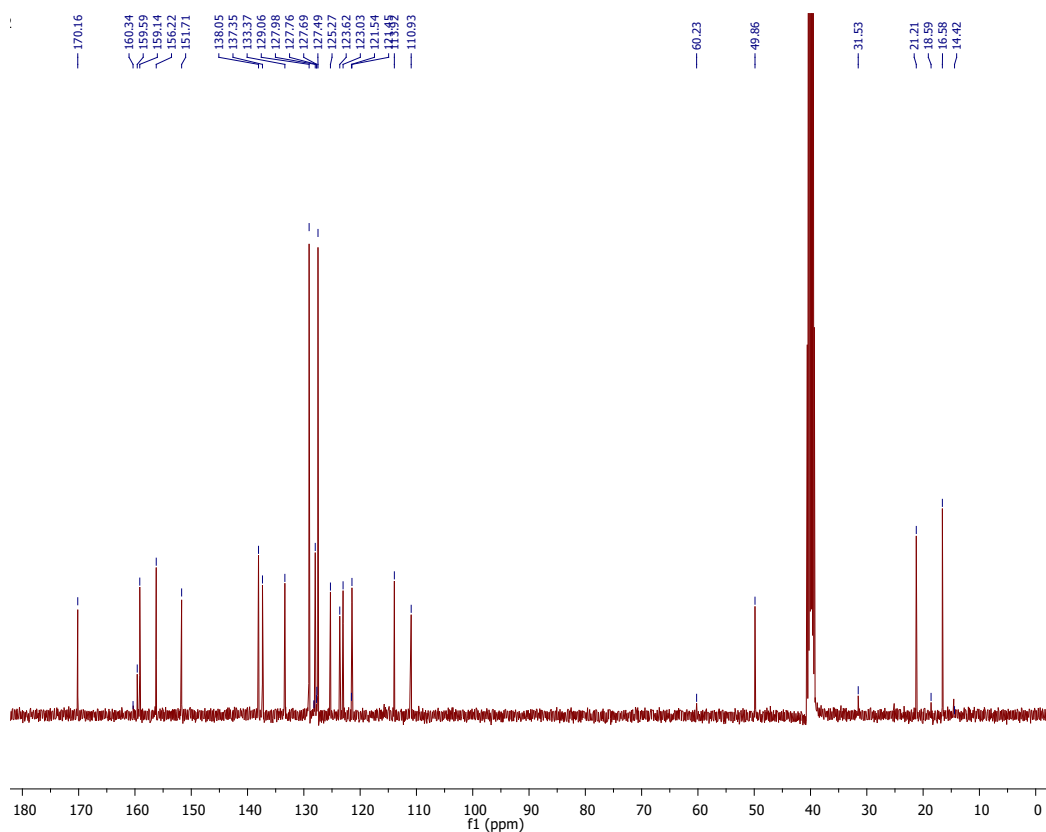

HRMS spectrum of compound **1b**.

MS Zoomed Spectrum

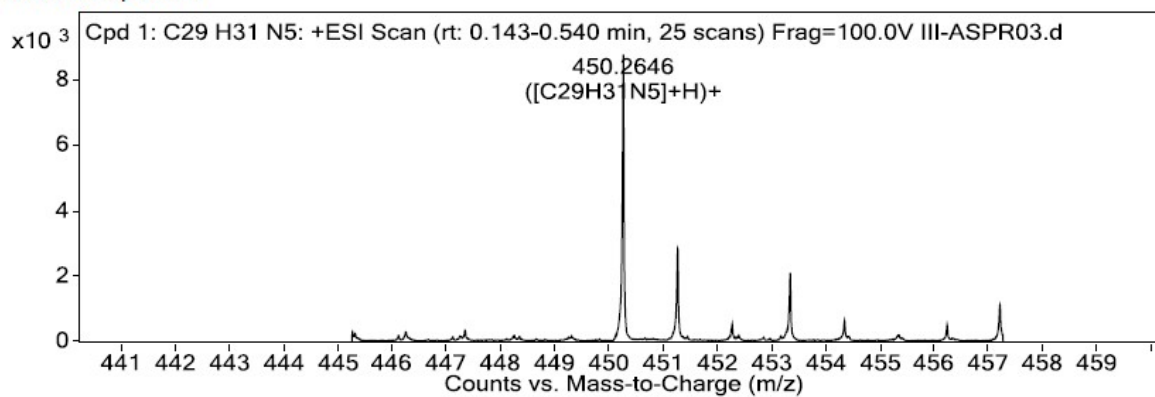

$^1\text{H}$  NMR spectrum of compound **1c** in  $\text{DMSO-d}_6$ .

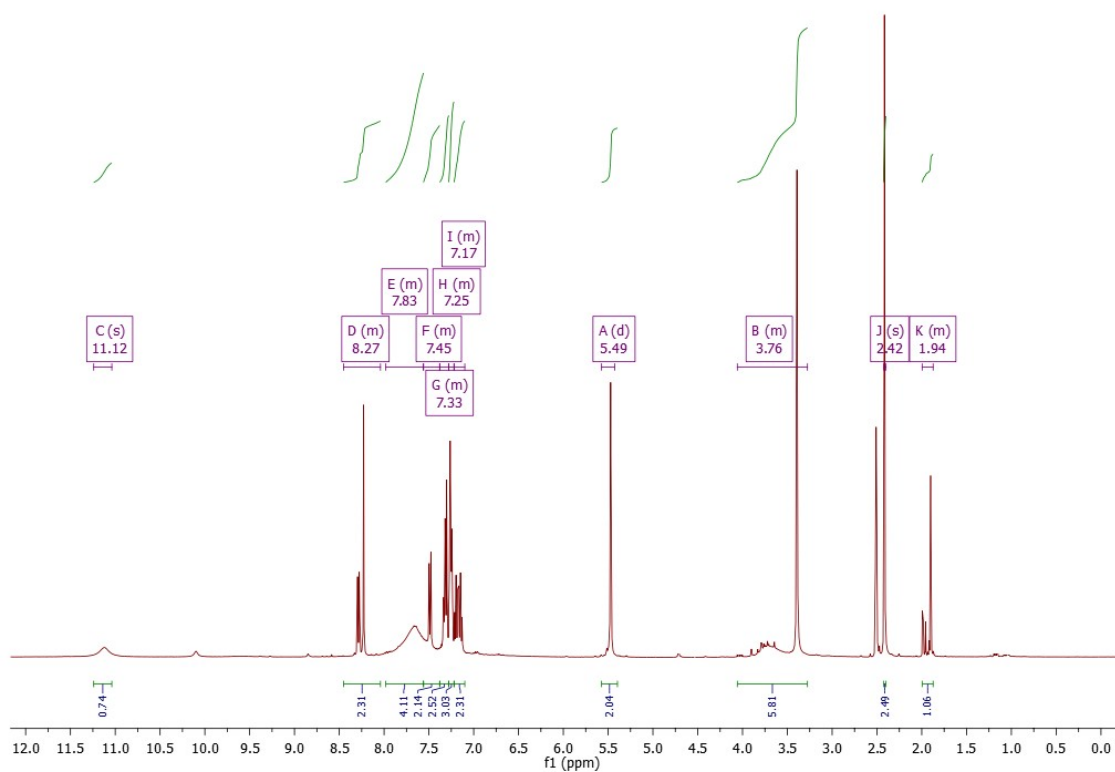

$^{13}\text{C}$  NMR spectrum of compound **1c** in  $\text{DMSO-d}_6$ .

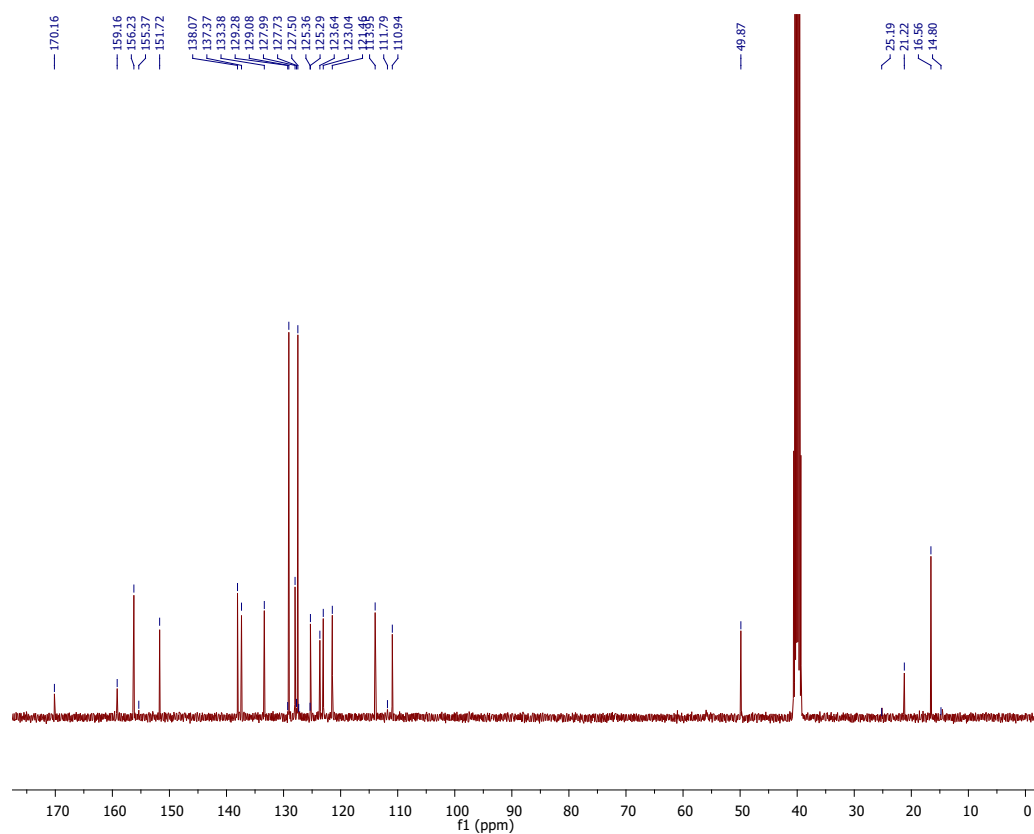

## HRMS spectrum of compound **1c**.

MS Zoomed Spectrum

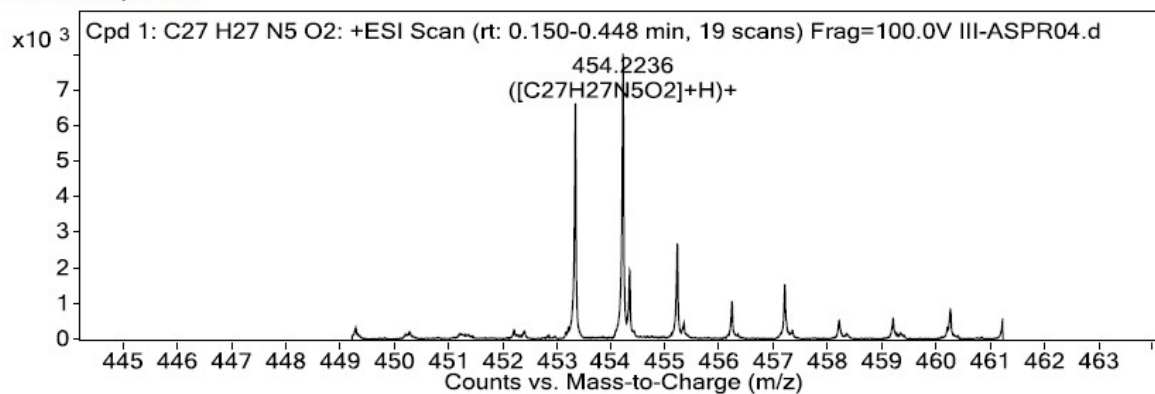

<sup>1</sup>H NMR spectrum of compound **1d** in DMSO-d<sub>6</sub>.

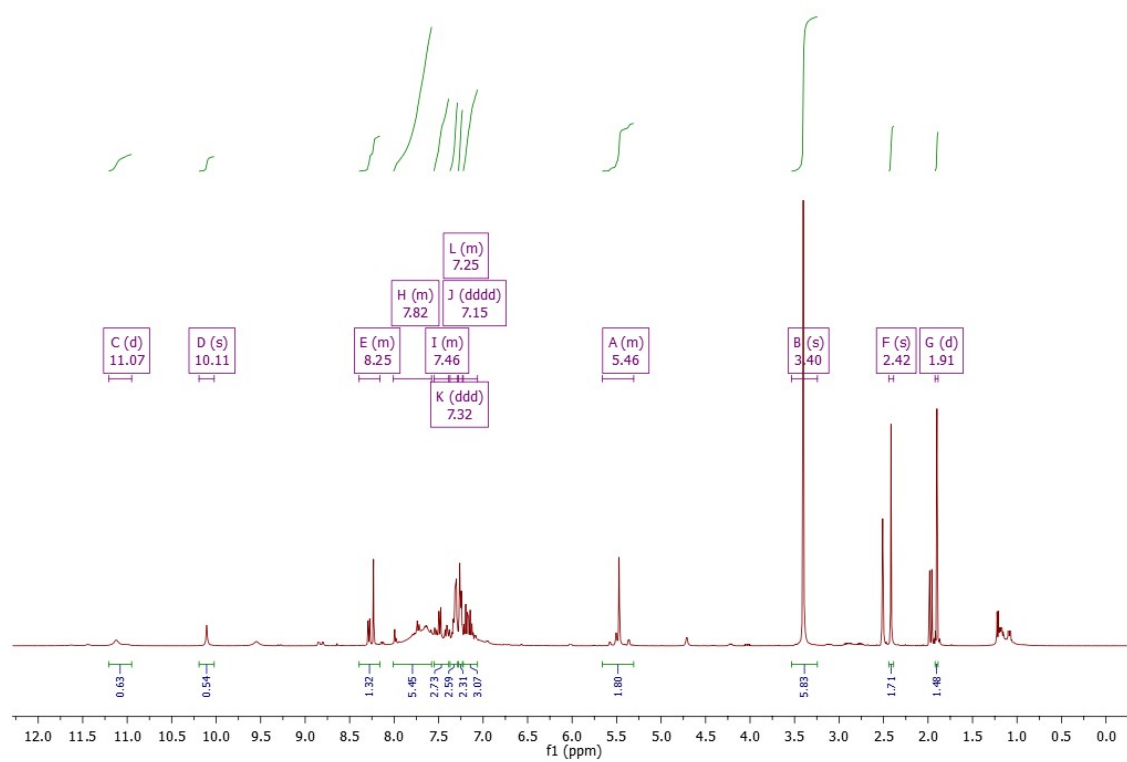

$^{13}\text{C}$

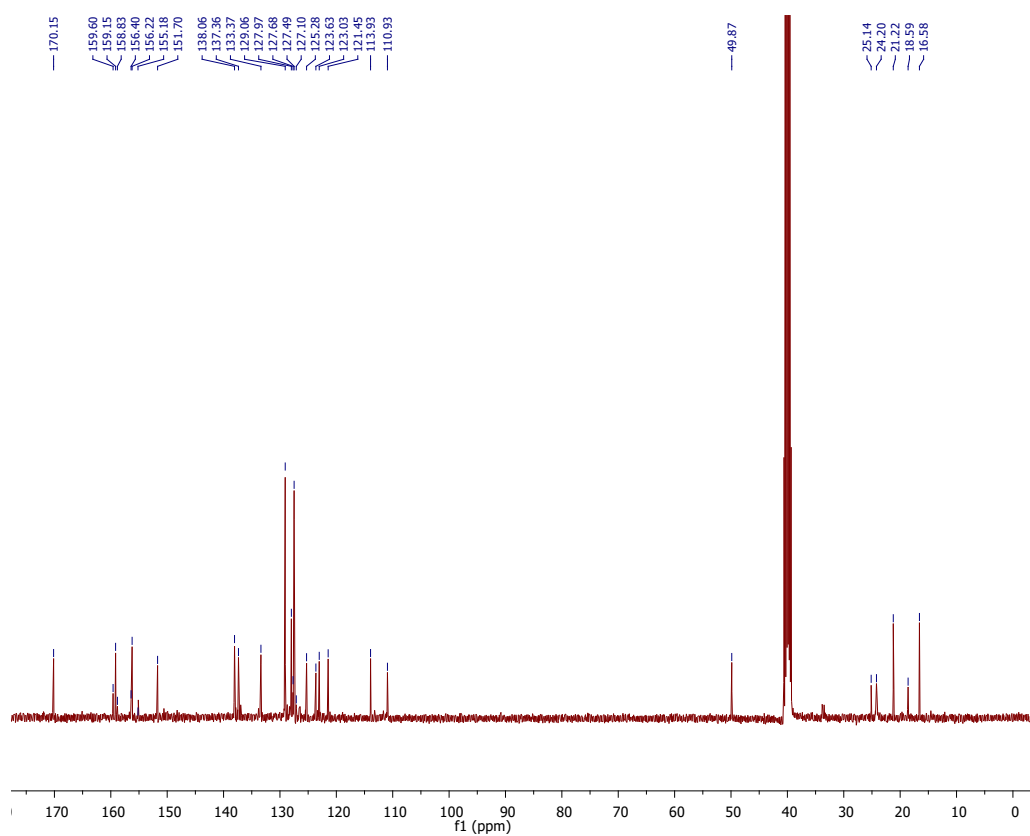

NMR spectrum of compound **1d** in  $\text{DMSO-d}_6$ .

HRMS spectrum of compound **1d**.

MS Zoomed Spectrum

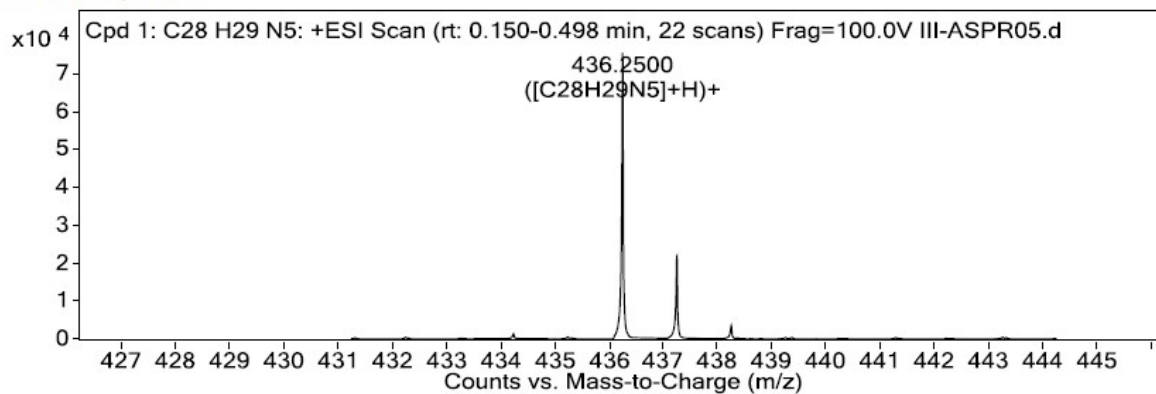

<sup>1</sup>H NMR spectrum of compound **1e** in DMSO-d<sub>6</sub>.

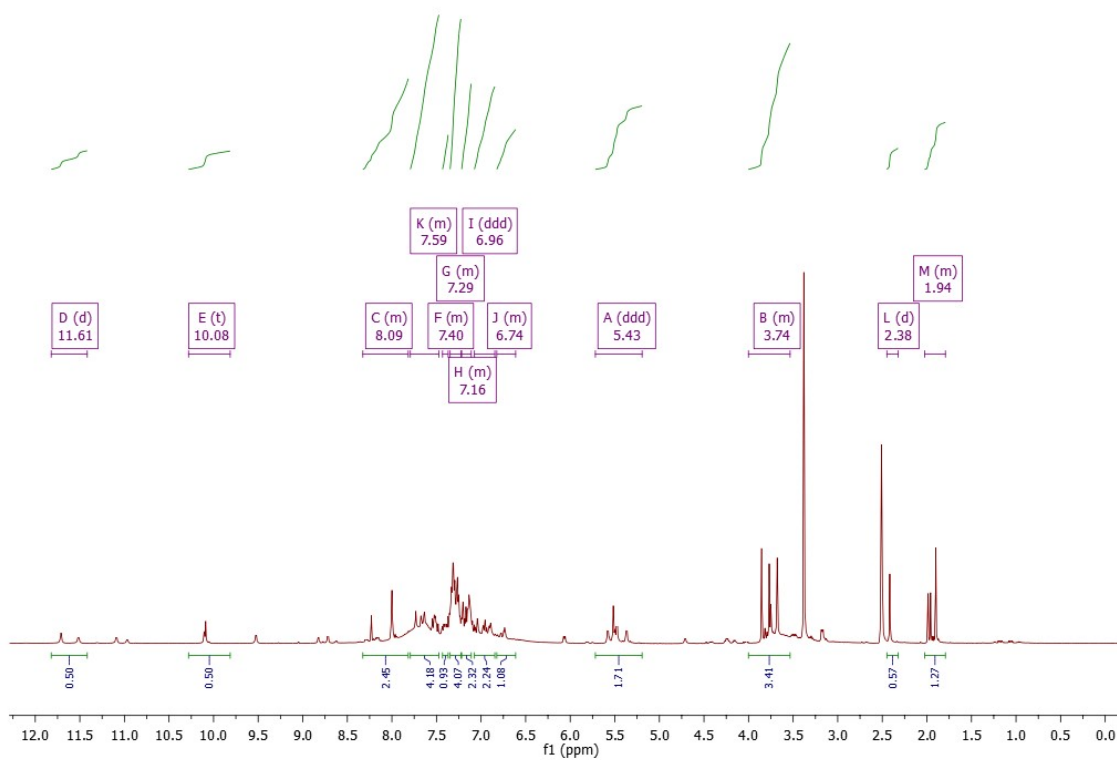



$^{13}\text{C}$  NMR spectrum of compound **1e** in  $\text{DMSO-d}_6$ .

HRMS spectrum of compound **1e**.

MS Zoomed Spectrum

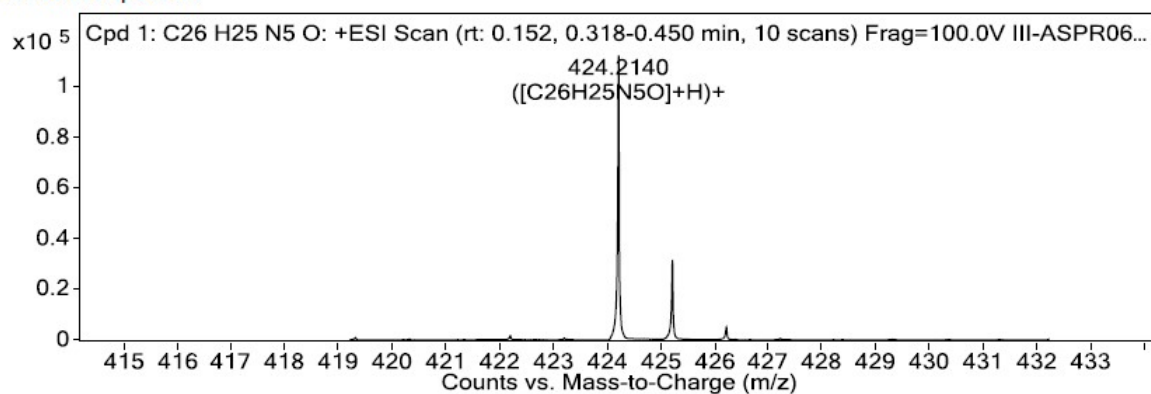

$^1\text{H}$

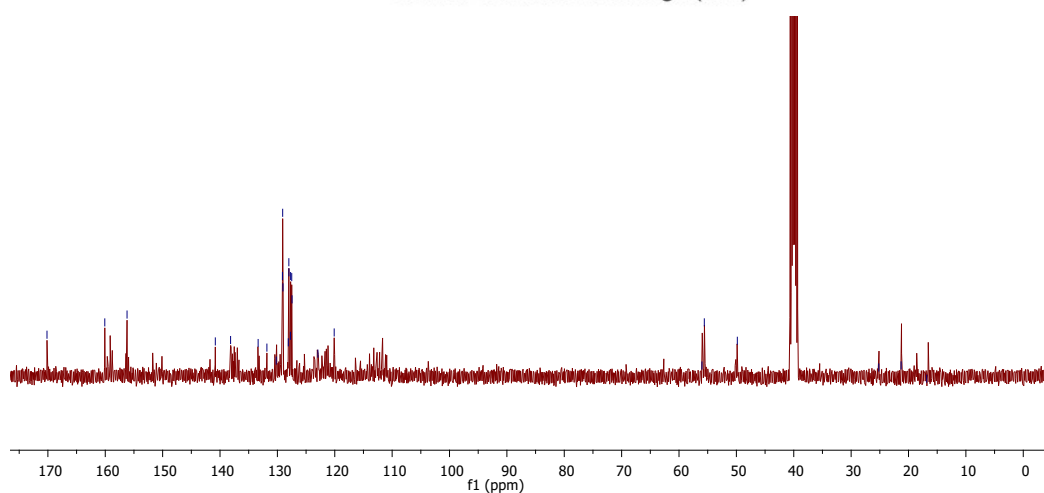

NMR spectrum of compound **1f** in  $\text{DMSO-d}_6$ .

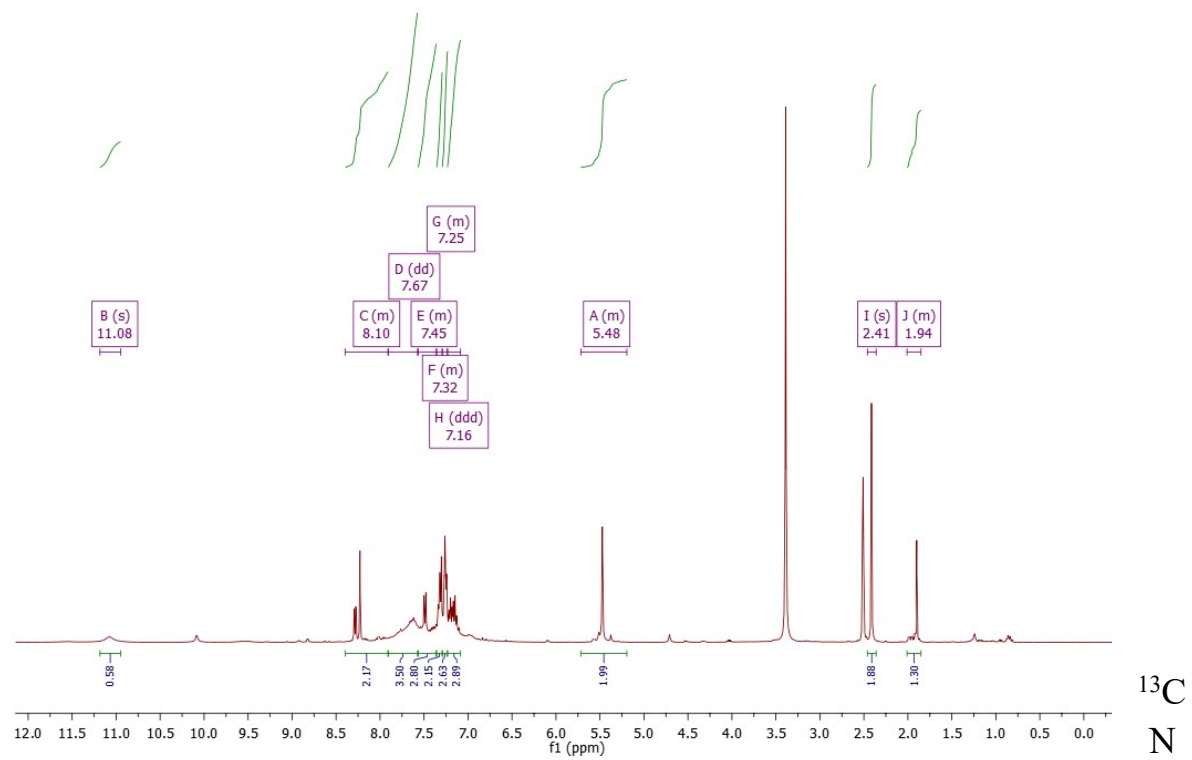

MR

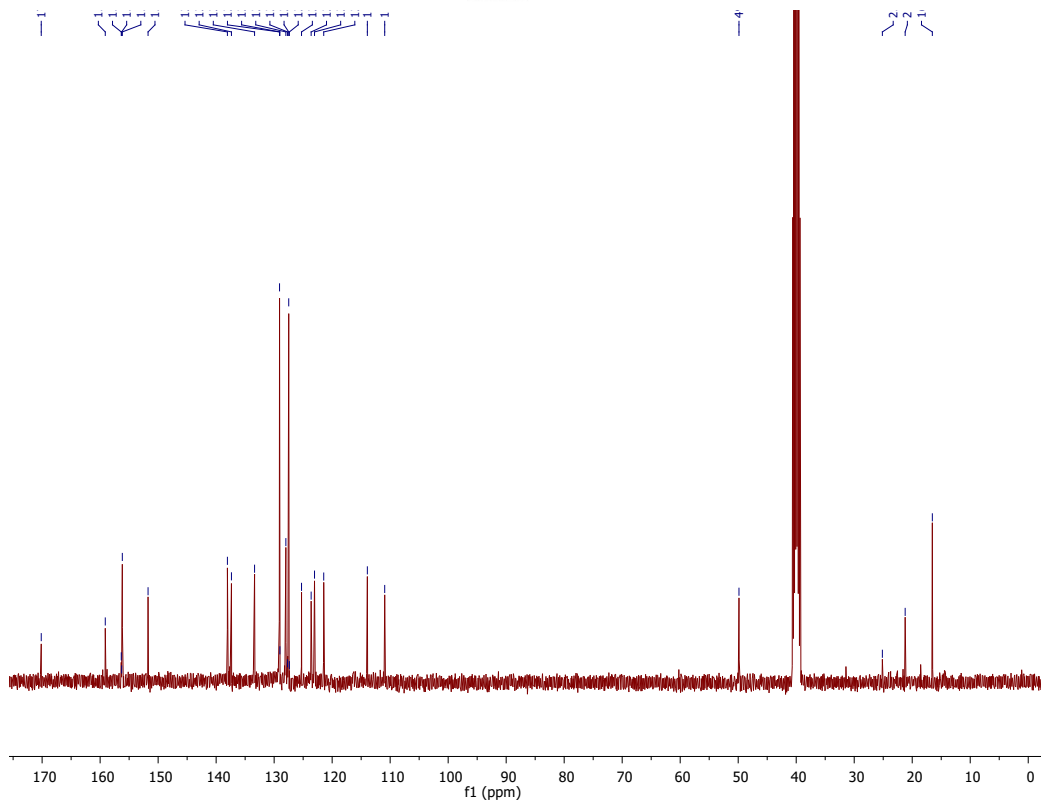

spectrum of compound **1f** in DMSO-d<sub>6</sub>.

HRMS spectrum of compound **1f**.

$^1\text{H}$  NMR spectrum of compound **1g** in  $\text{DMSO-d}_6$ .

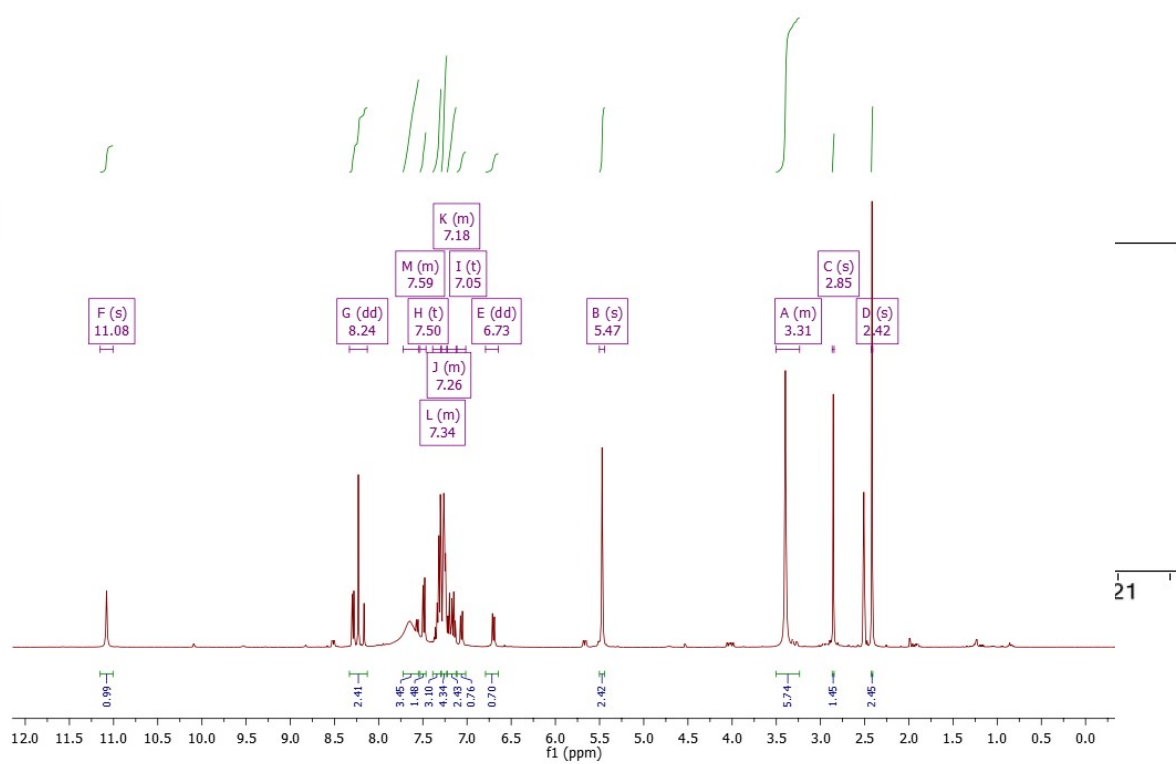

$^{13}\text{C}$  NMR spectrum of compound **1g** in  $\text{DMSO-d}_6$ .

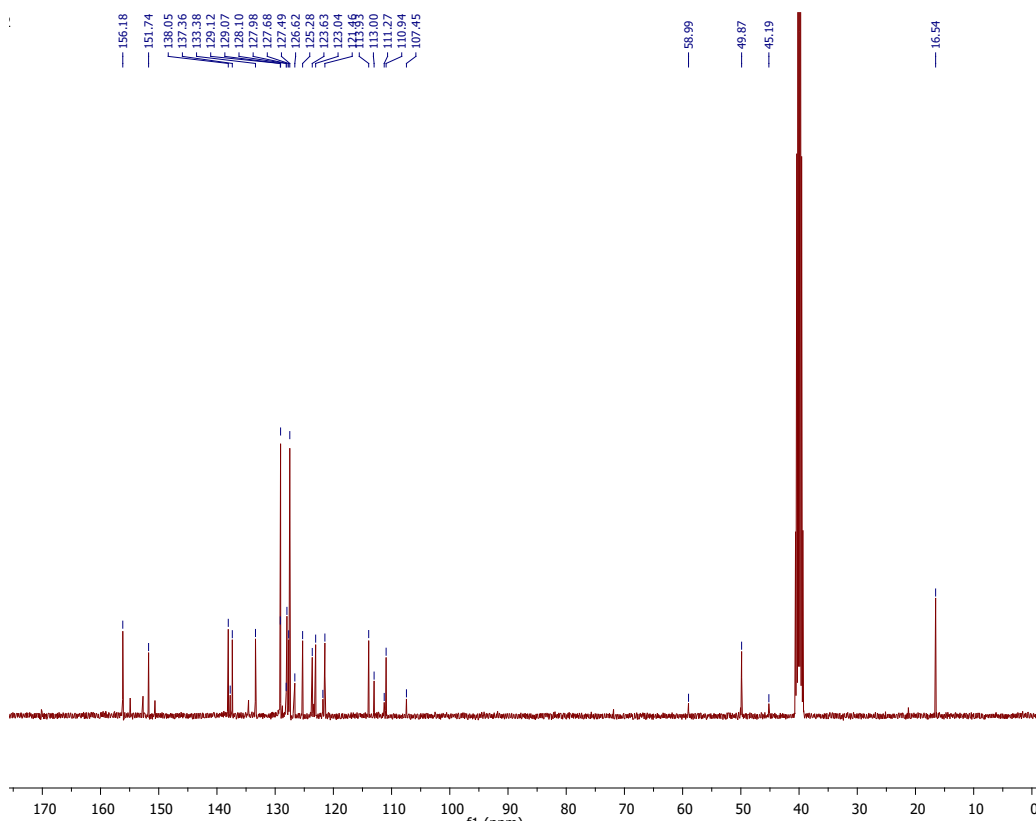

HRMS spectrum of compound **1g**.

MS Zoomed Spectrum

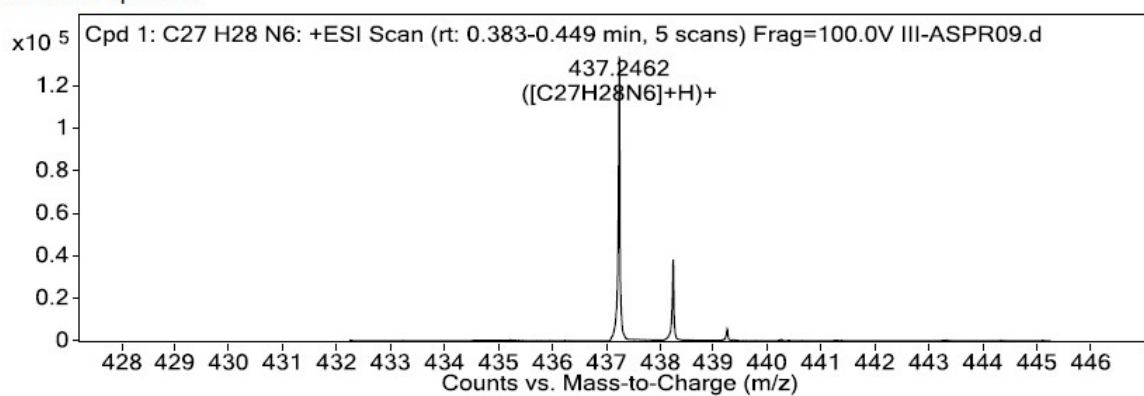

$^1\text{H}$  NMR spectrum of compound **1h** in  $\text{DMSO-d}_6$ .

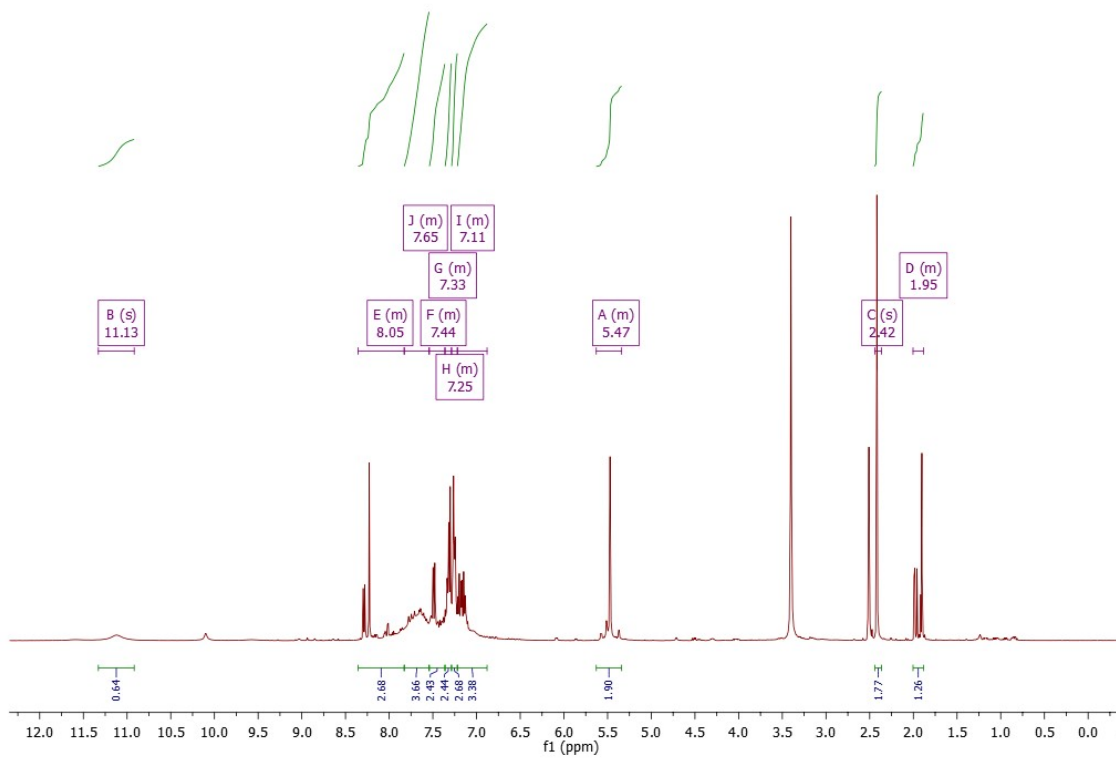

<sup>13</sup>C  
N  
M  
R  
spe  
ctr  
um

of

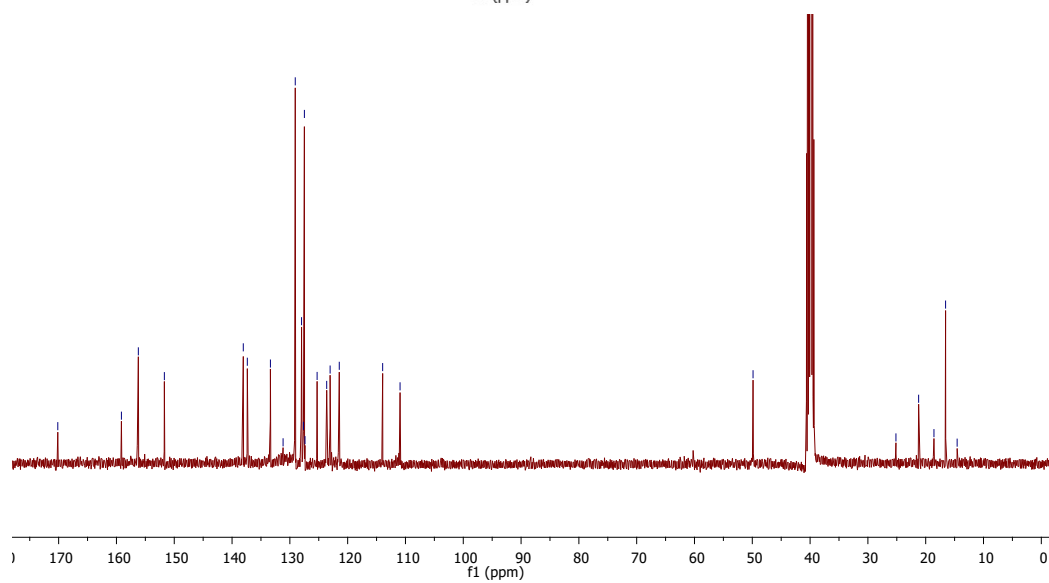

compound **1h** in DMSO-d<sub>6</sub>.

MS Zoomed Spectrum

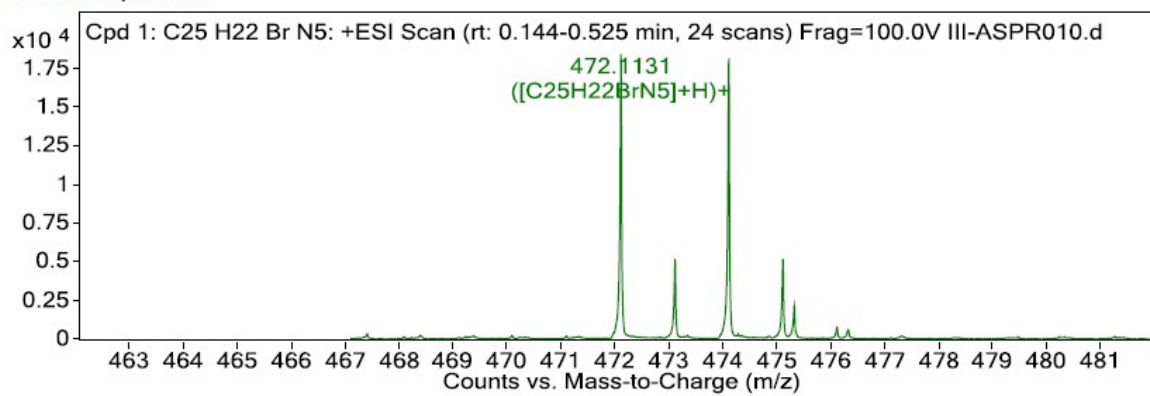

HRMS spectrum of compound **1h**.

<sup>1</sup>H NMR spectrum of compound **1i** in DMSO-d<sub>6</sub>.

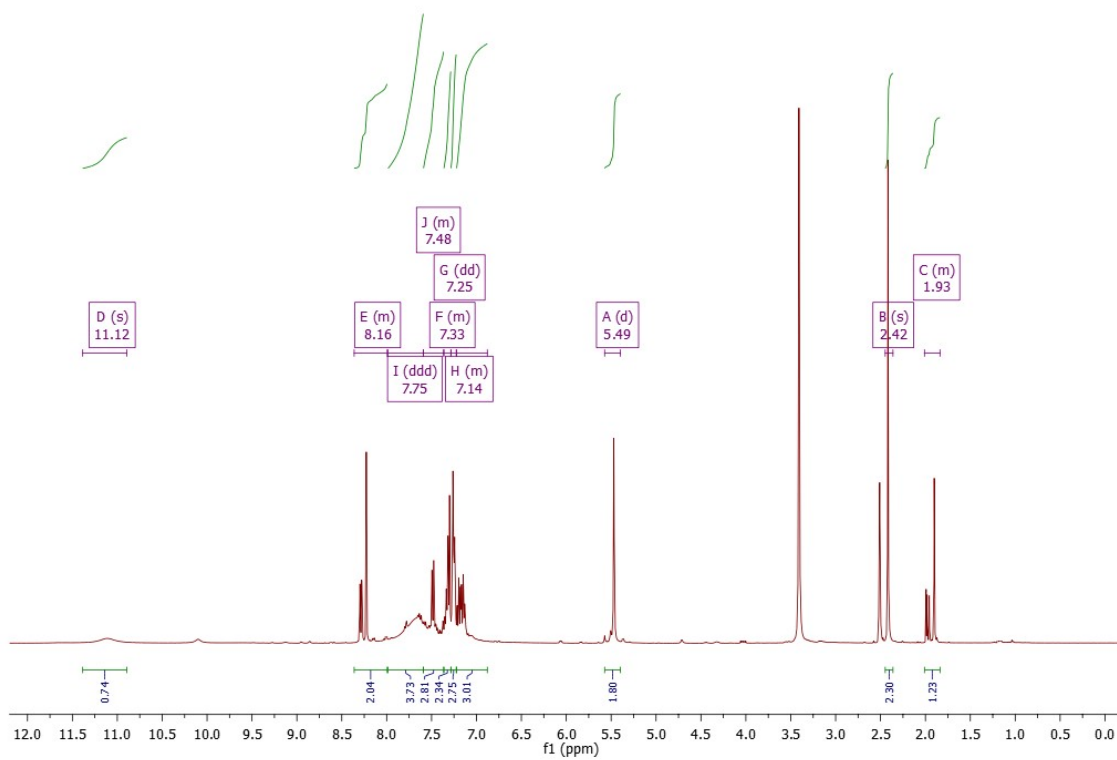

<sup>13</sup>C NMR spectrum of compound **1i** in DMSO-d<sub>6</sub>.

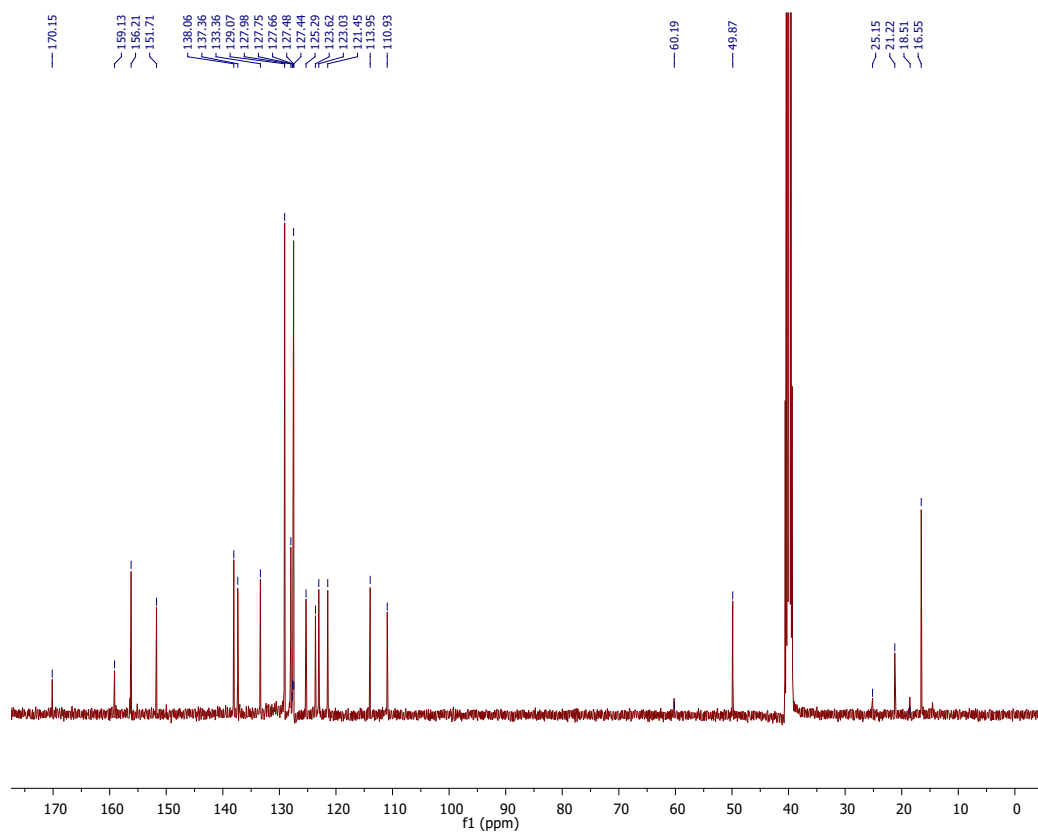

# HRMS spectrum of compound **1i**.

MS Zoomed Spectrum

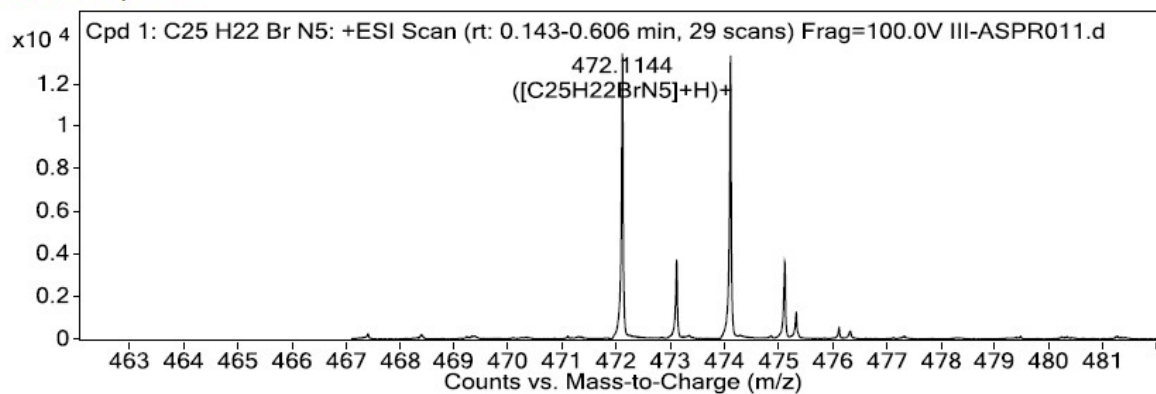

# <sup>1</sup>H NMR spectrum of compound **1j** in DMSO-d<sub>6</sub>.

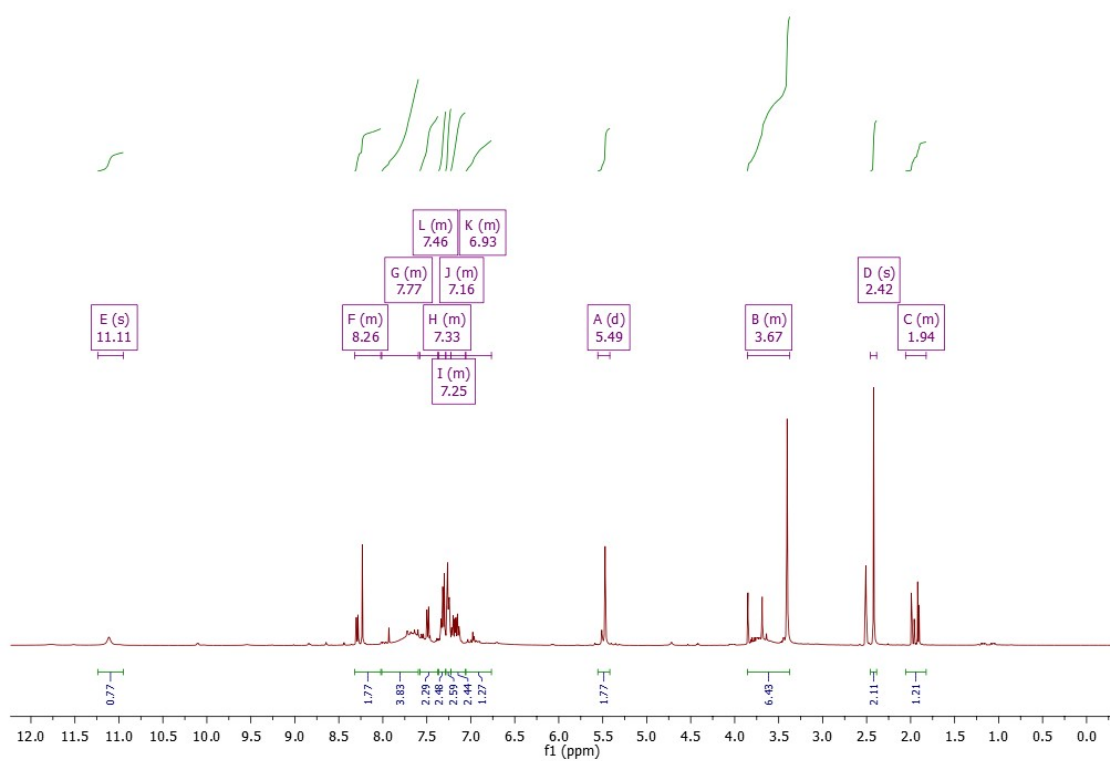

<sup>13</sup>C  
NMR  
spe  
ctru  
m

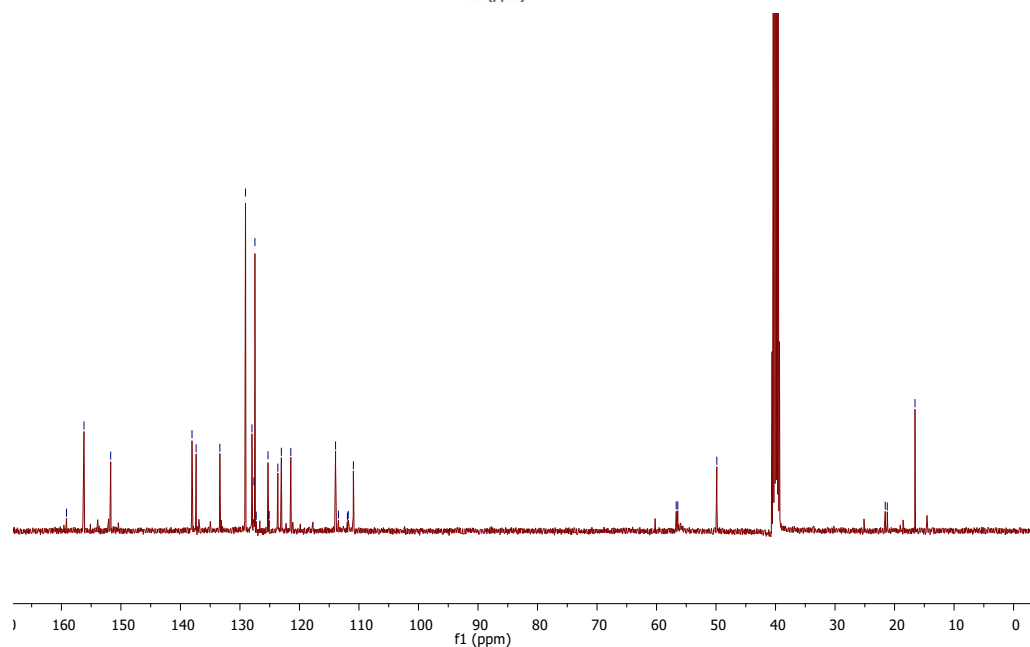



of compound **1j** in DMSO-d<sub>6</sub>.

MS Zoomed Spectrum

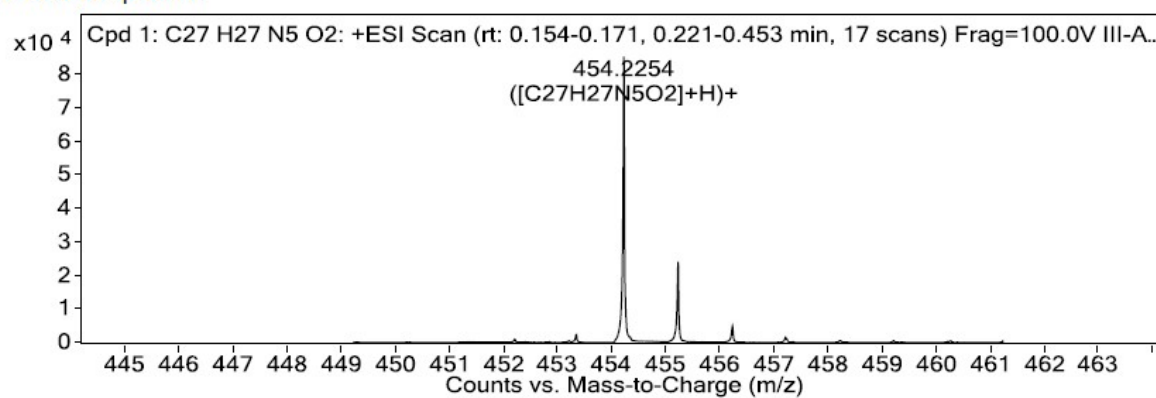

HRMS spectrum of compound **1j**.

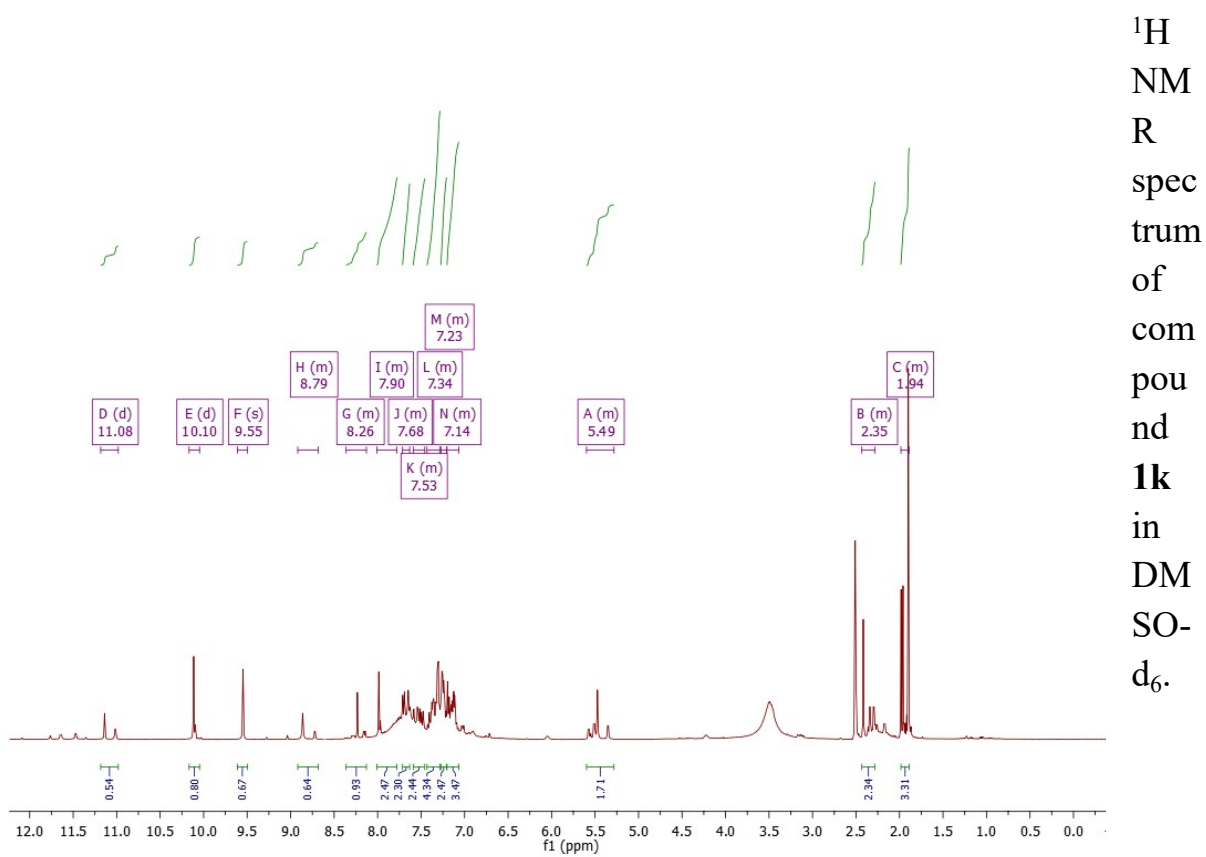

$^{13}\text{C}$  NMR spectrum of compound **1k** in  $\text{DMSO-d}_6$ .

HRMS spectrum of compound **1k**.

MS Zoomed Spectrum

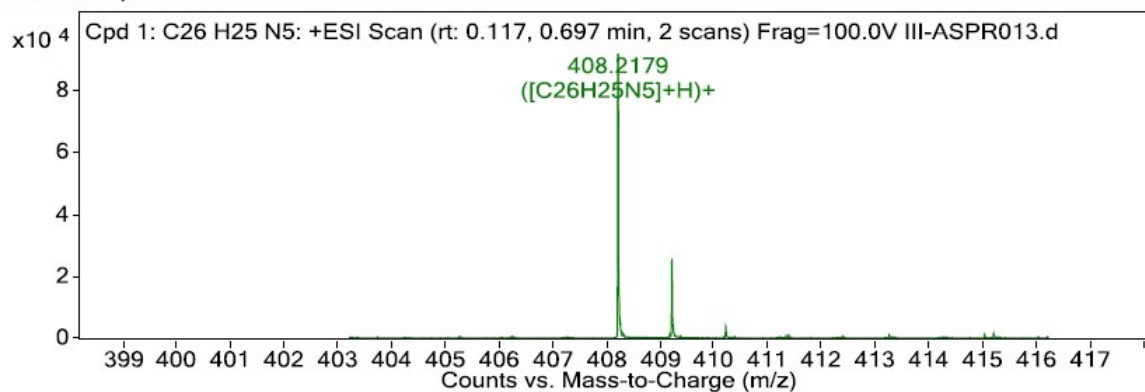

$^1\text{H}$

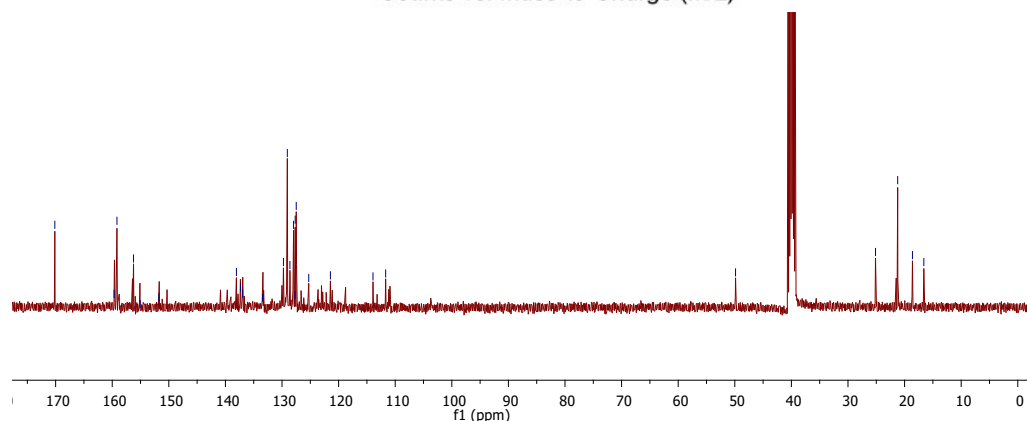

NMR spectrum of compound **1l** in  $\text{DMSO-d}_6$ .

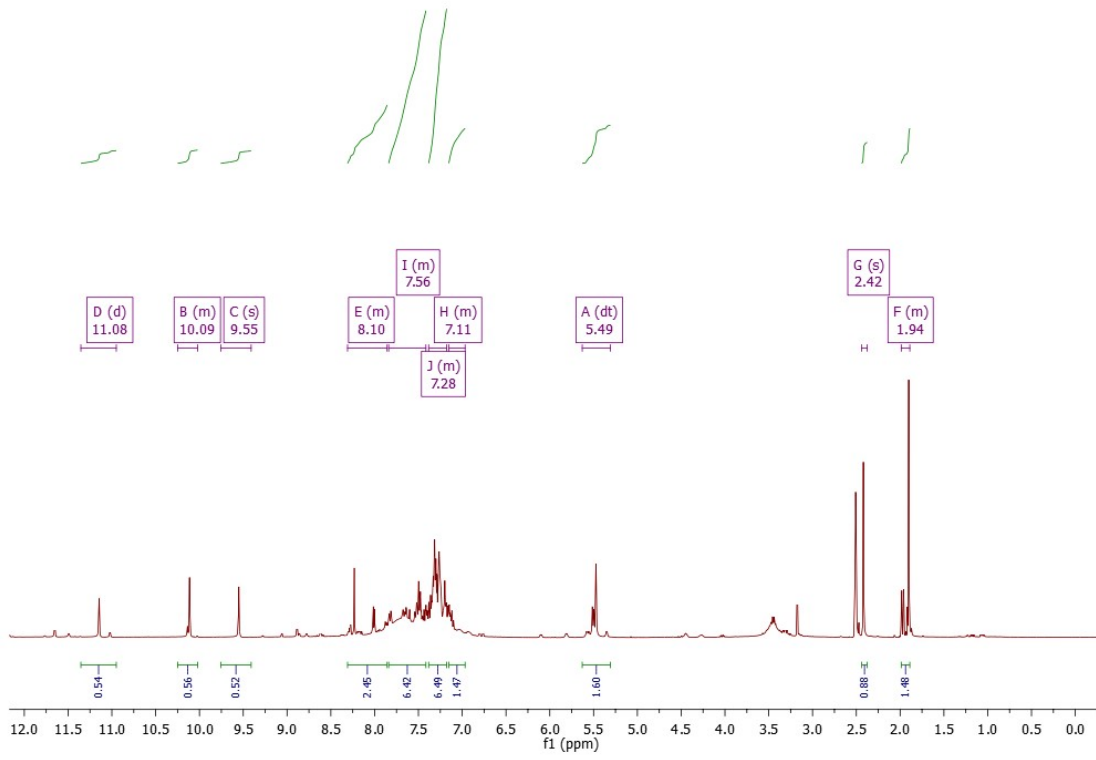

$^{13}\text{C}$

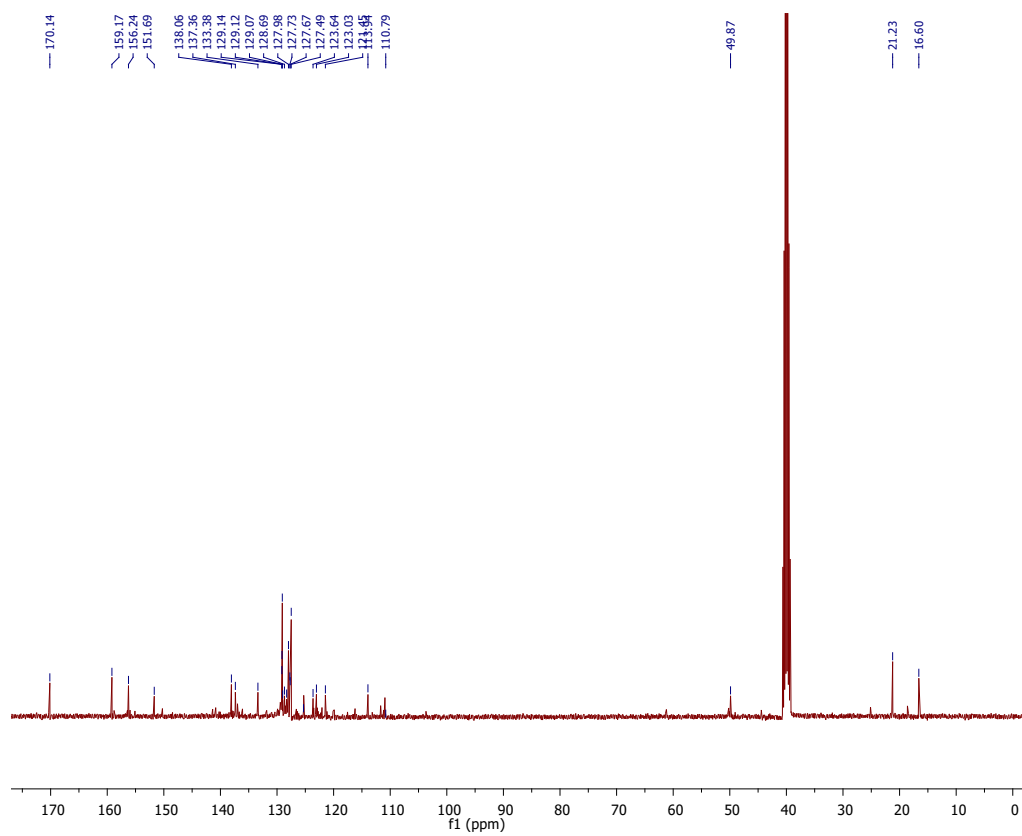

NMR spectrum of compound **11** in  $\text{DMSO-d}_6$ .

MS Zoomed Spectrum

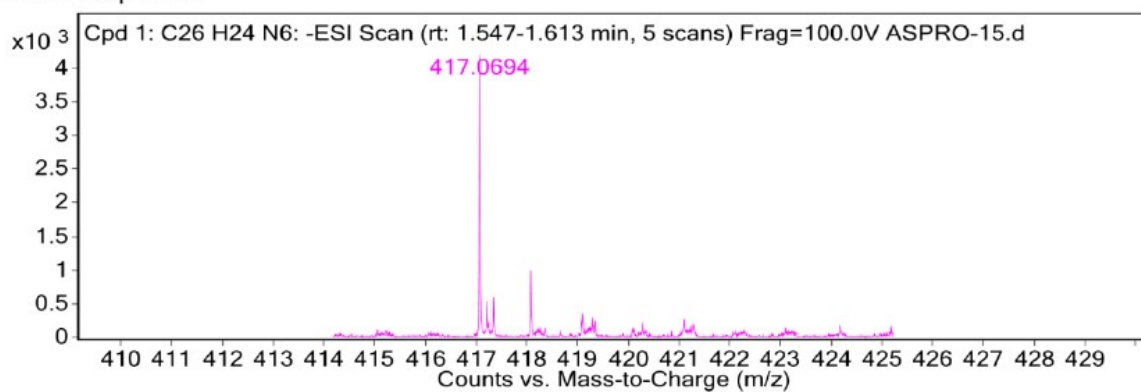

HRMS spectrum of compound **1l**.

<sup>1</sup>H NMR spectrum of compound **1n** in DMSO-d<sub>6</sub>.

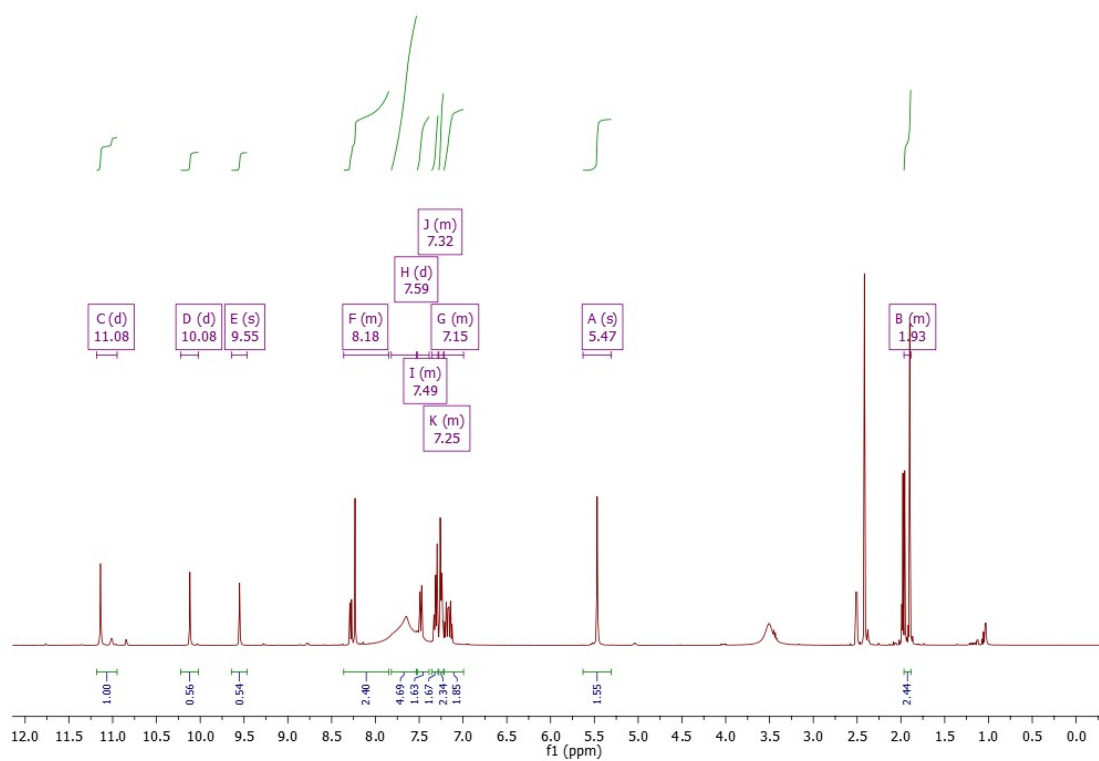

$^{13}\text{C}$  NMR spectrum of compound **1n** in  $\text{DMSO-d}_6$ .

MS Zoomed Spectrum

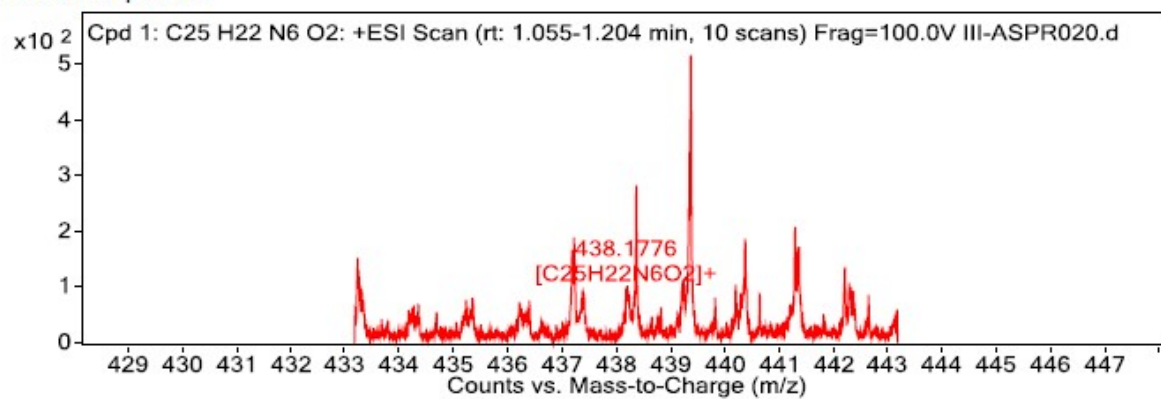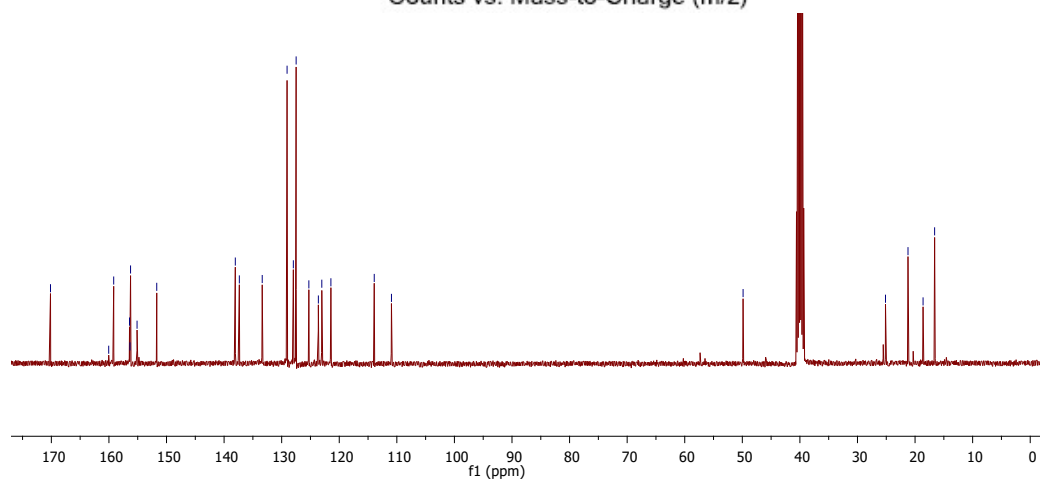

HRMS spectrum of compound **1n**.

$^1\text{H}$  NMR spectrum of compound **1o** in  $\text{DMSO-d}_6$ .

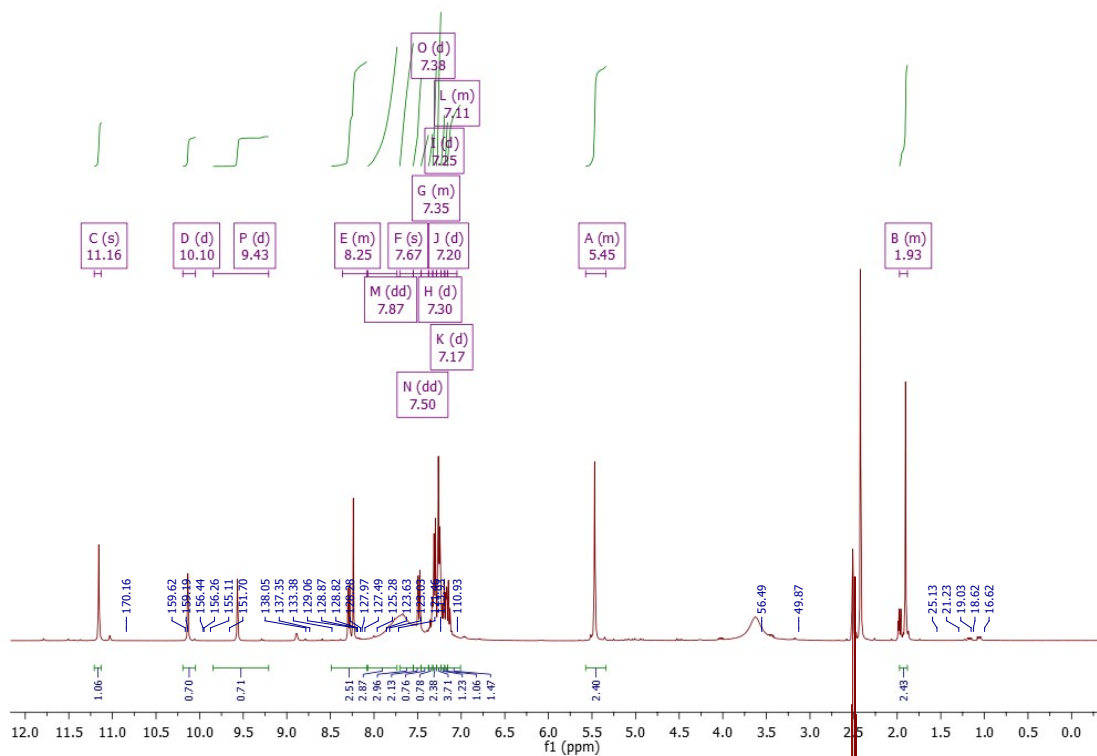

$^{13}\text{C}$   
NMR  
spe  
ctru  
m

of

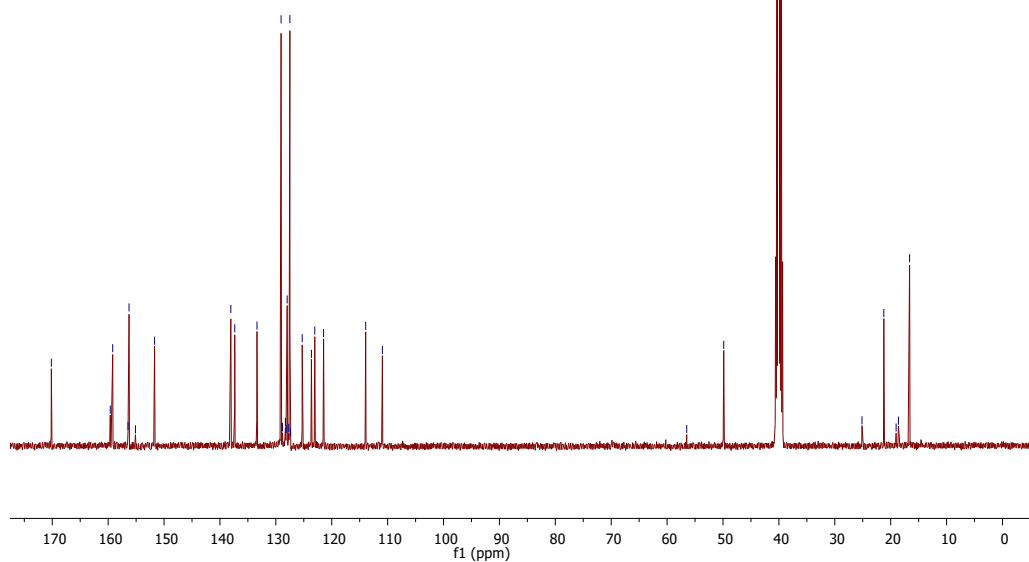

compound **1o** in  $\text{DMSO-d}_6$ .



MS Zoomed Spectrum

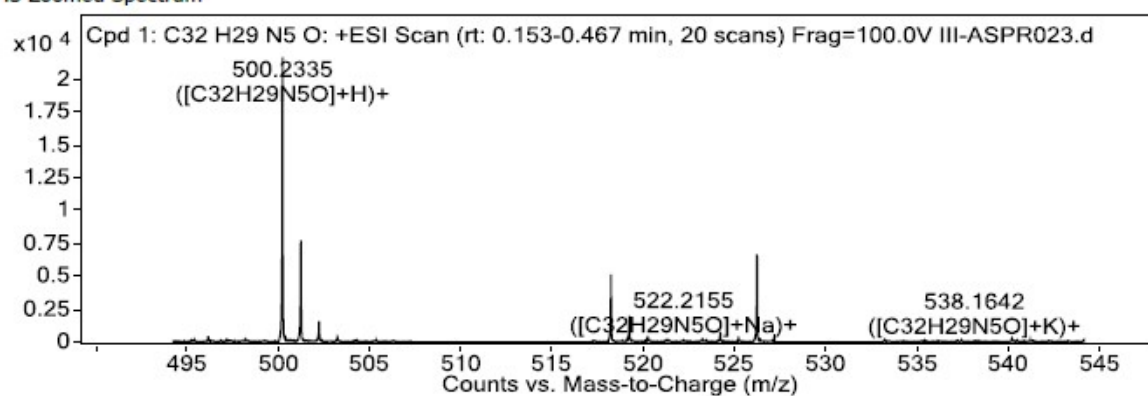

HRMS spectrum of compound **1o**.

<sup>1</sup>H NMR spectrum of compound **1p** in DMSO-d<sub>6</sub>.

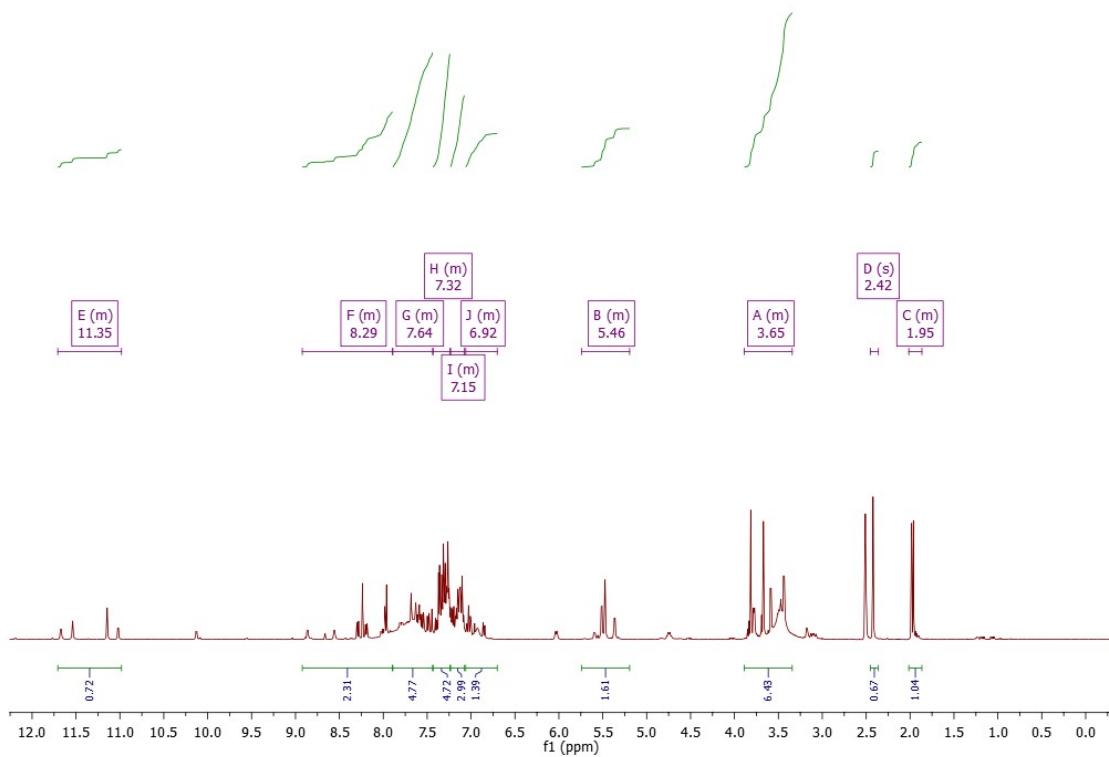

<sup>13</sup>C NMR spectrum of compound **1p** in DMSO-d<sub>6</sub>.

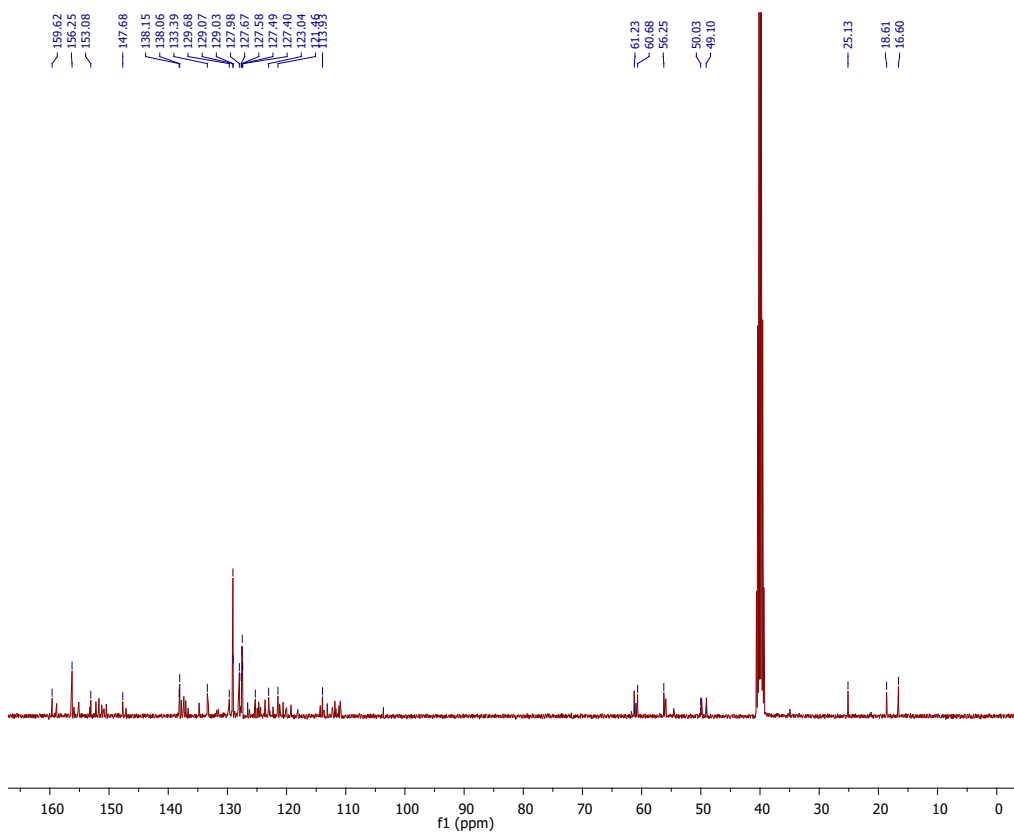

MS Zoomed Spectrum

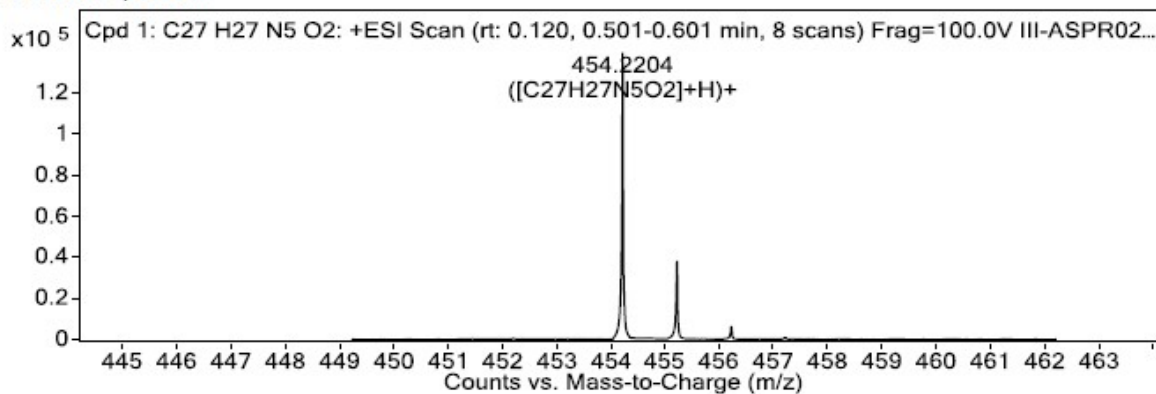

HRMS spectrum of compound **1p**.

<sup>1</sup>H NMR spectrum of compound **1q** in DMSO-d<sub>6</sub>.

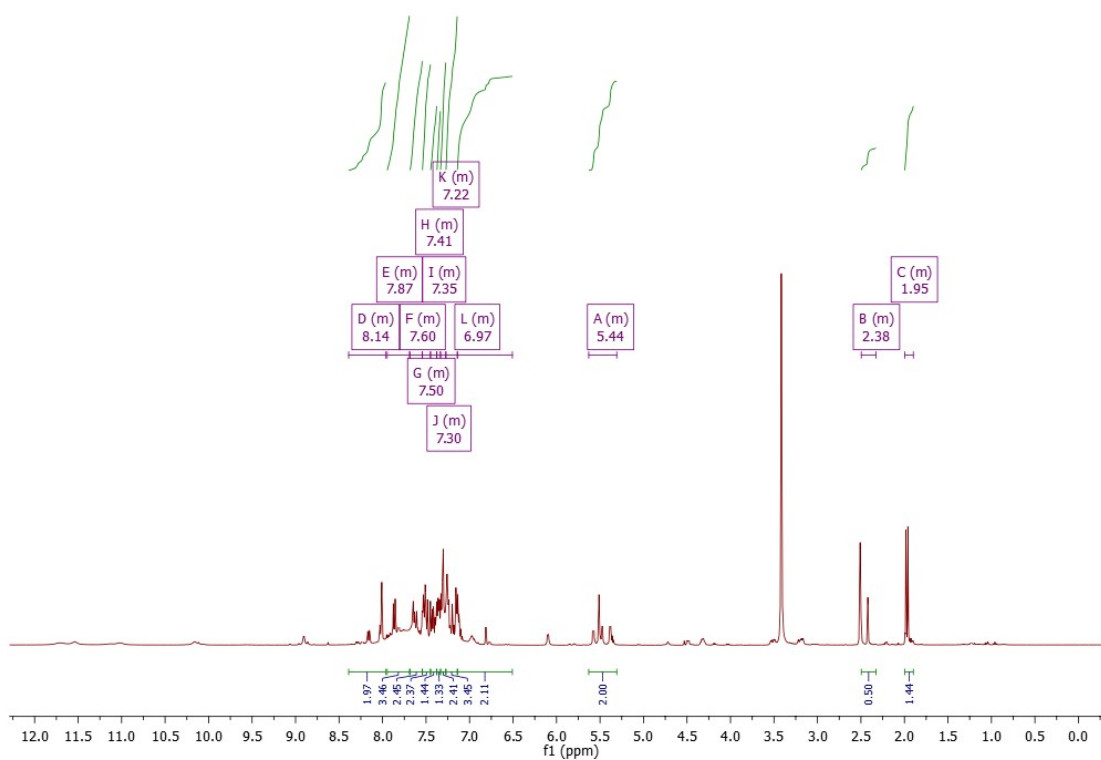

<sup>13</sup>C  
NMR  
spe  
ctru  
m

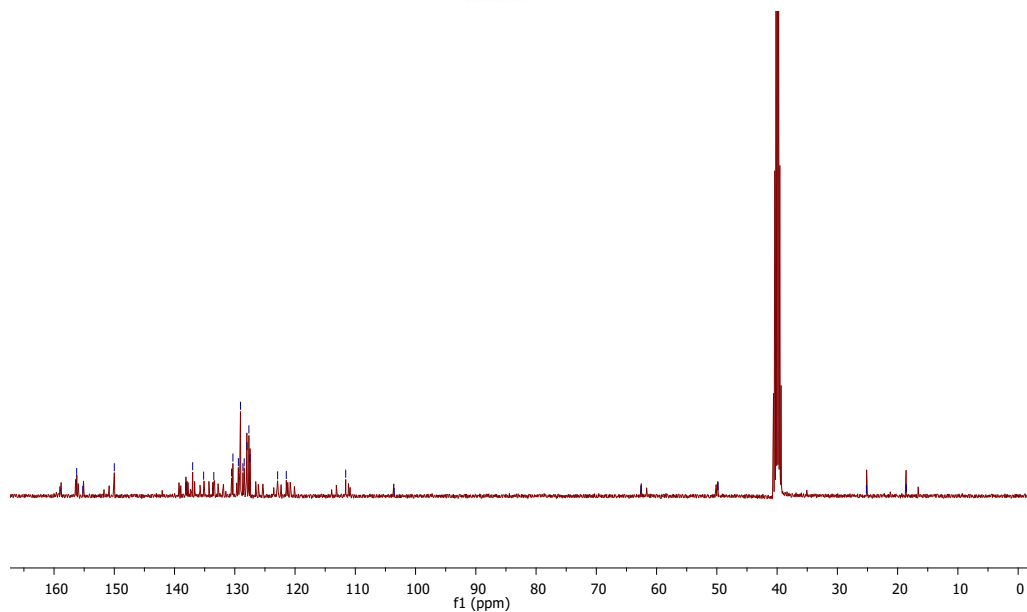

of compound **1q** in DMSO-d<sub>6</sub>.

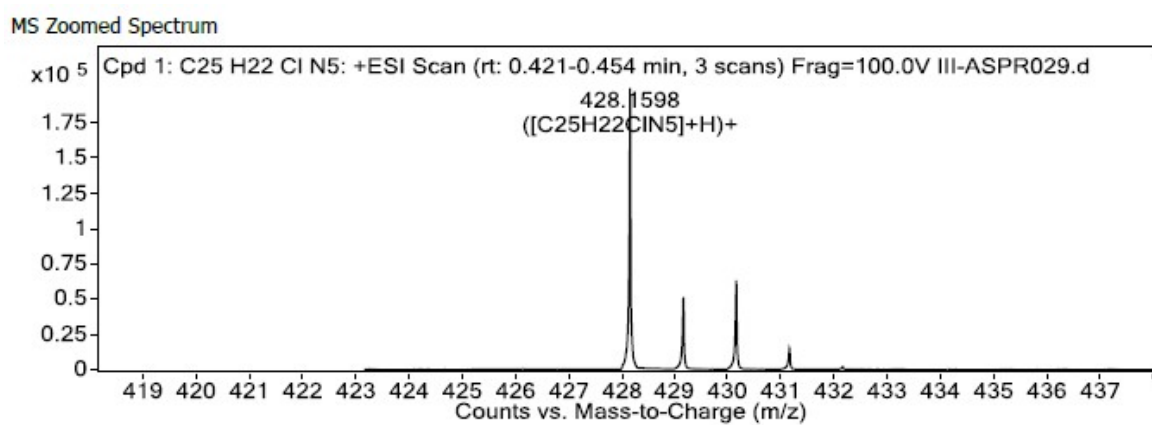

HRMS spectrum of compound **1q**.

$^1\text{H}$  NMR spectrum of compound **1r** in  $\text{DMSO-d}_6$ .

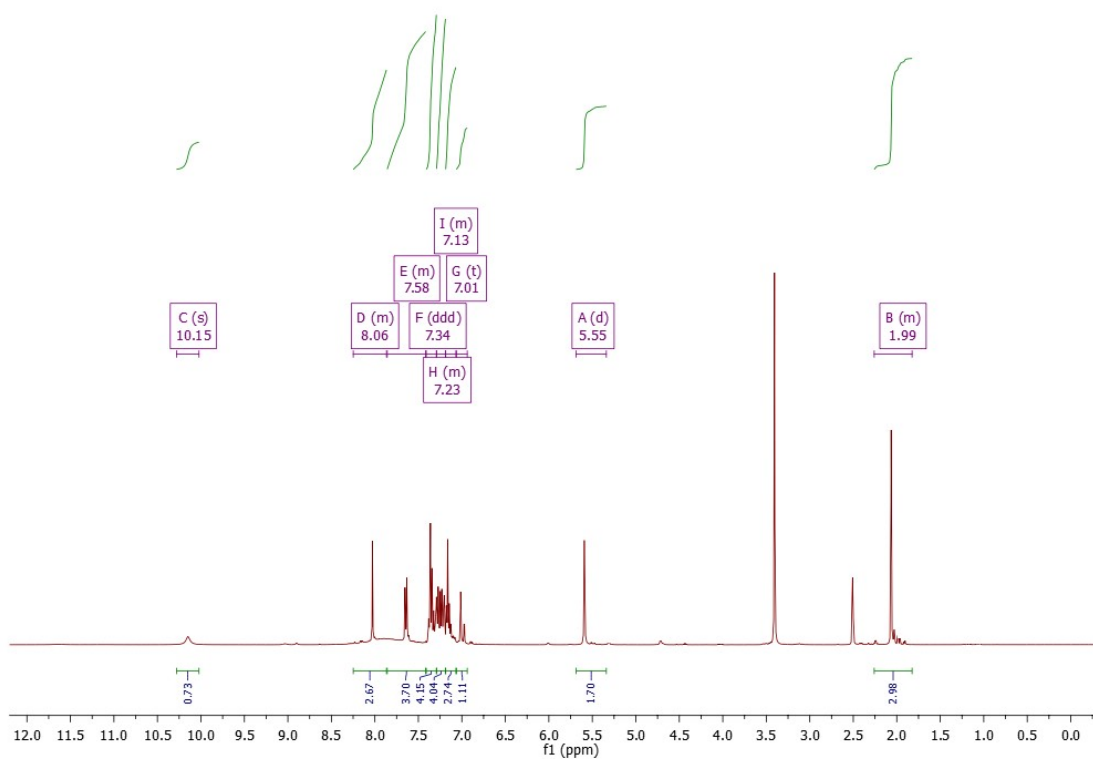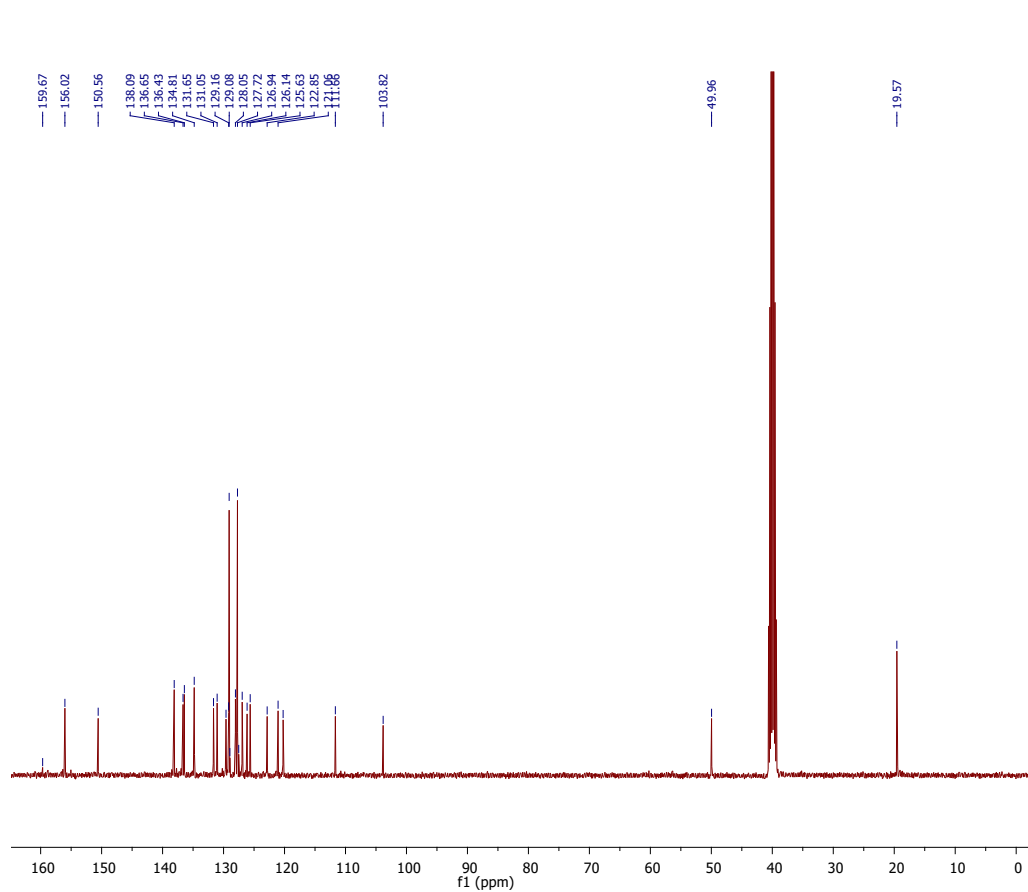

$^{13}\text{C}$   
NMR  
spectrum  
of  
compound  
**1r**  
in  
 $\text{DMSO-d}_6$ .

MS Zoomed Spectrum

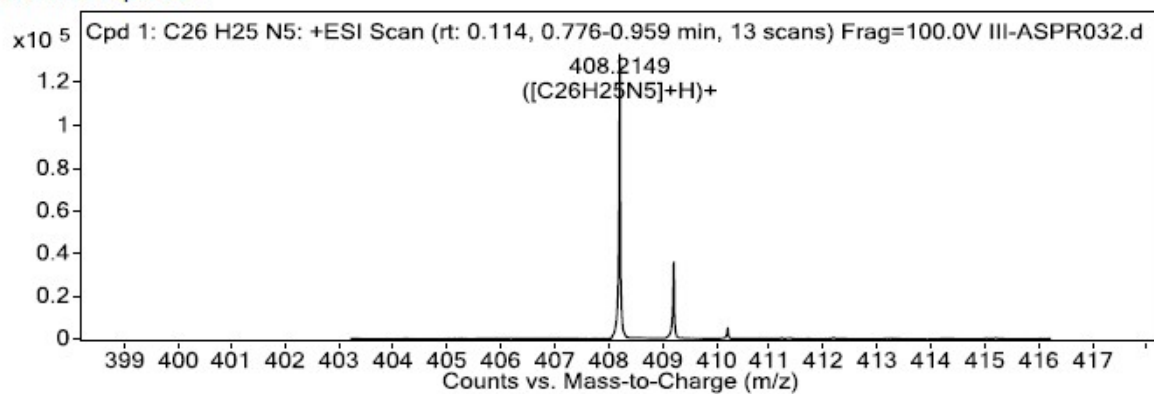

HRMS spectrum of compound **1r**.

<sup>1</sup>H NMR spectrum of compound **2a** in DMSO-d<sub>6</sub>.

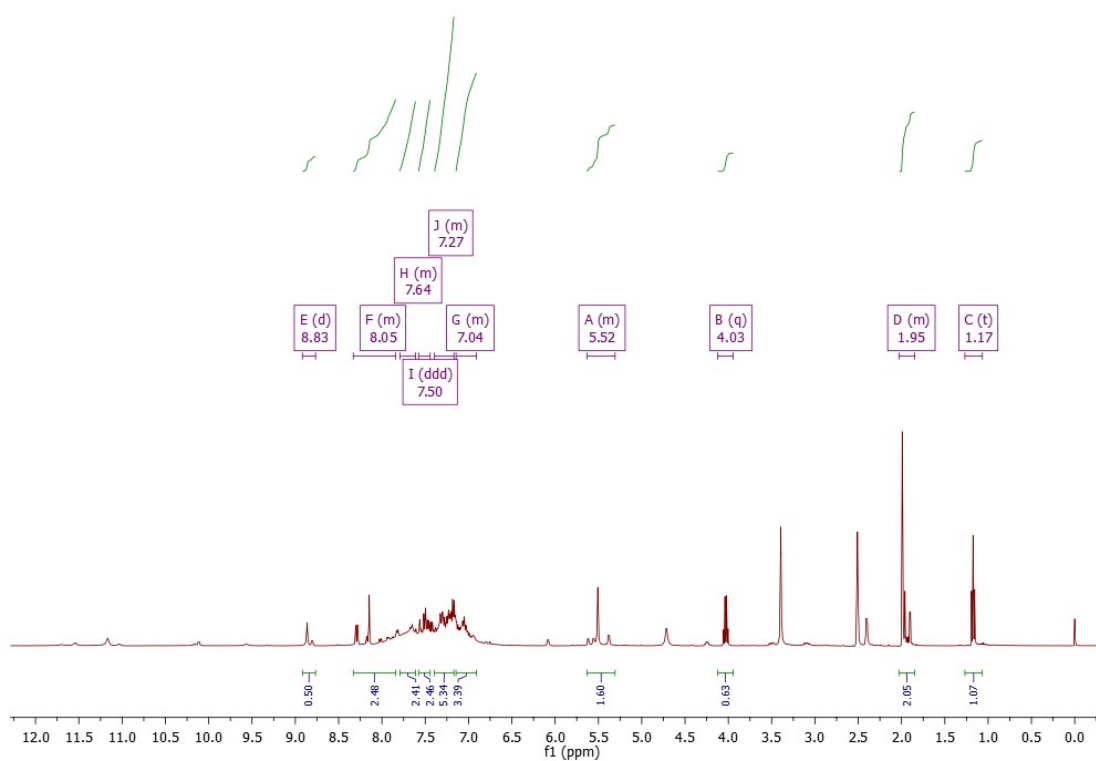

$^{13}\text{C}$

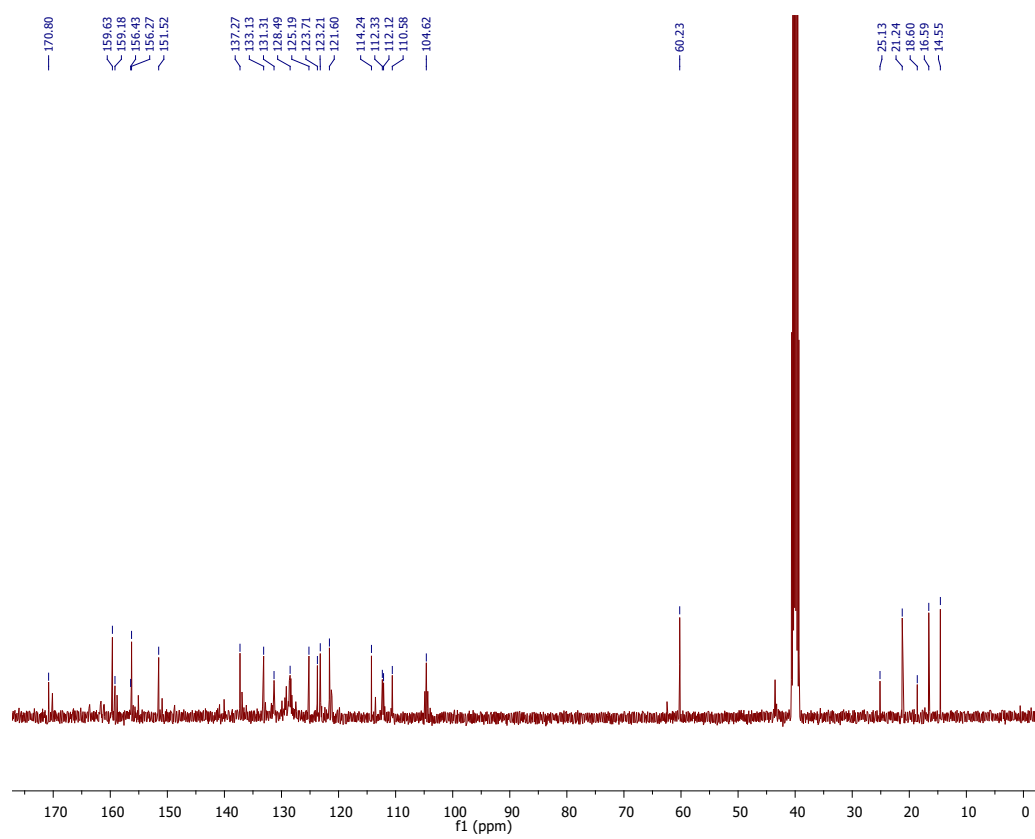

NMR spectrum of compound **2a** in DMSO- $d_6$ .

## HRMS spectrum of compound **2a**.

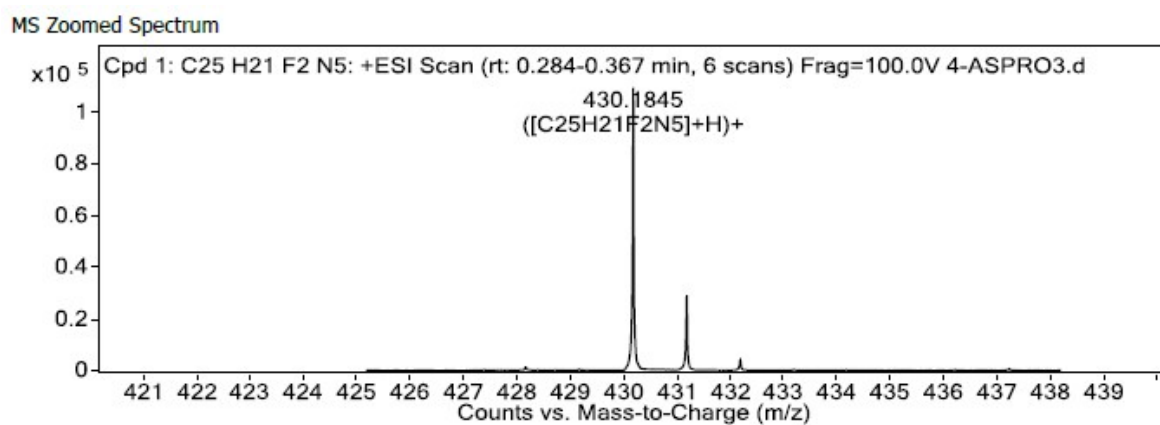

## <sup>1</sup>H NMR spectrum of compound **2d** in DMSO-d<sub>6</sub>.

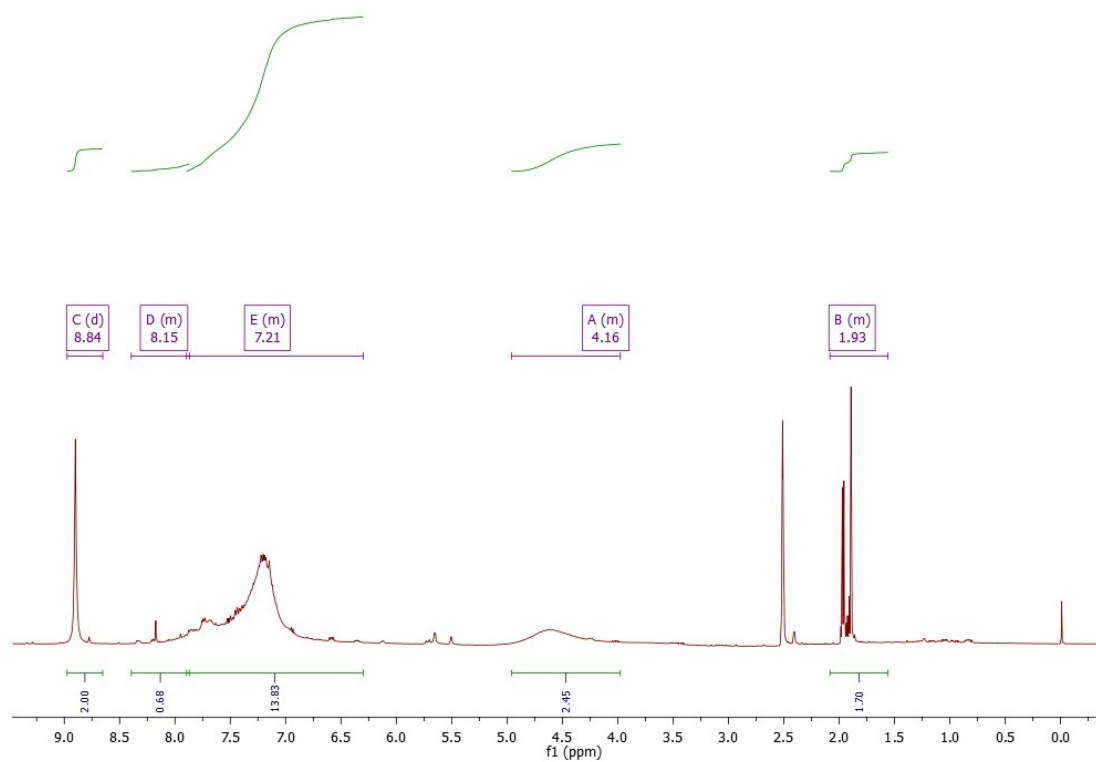



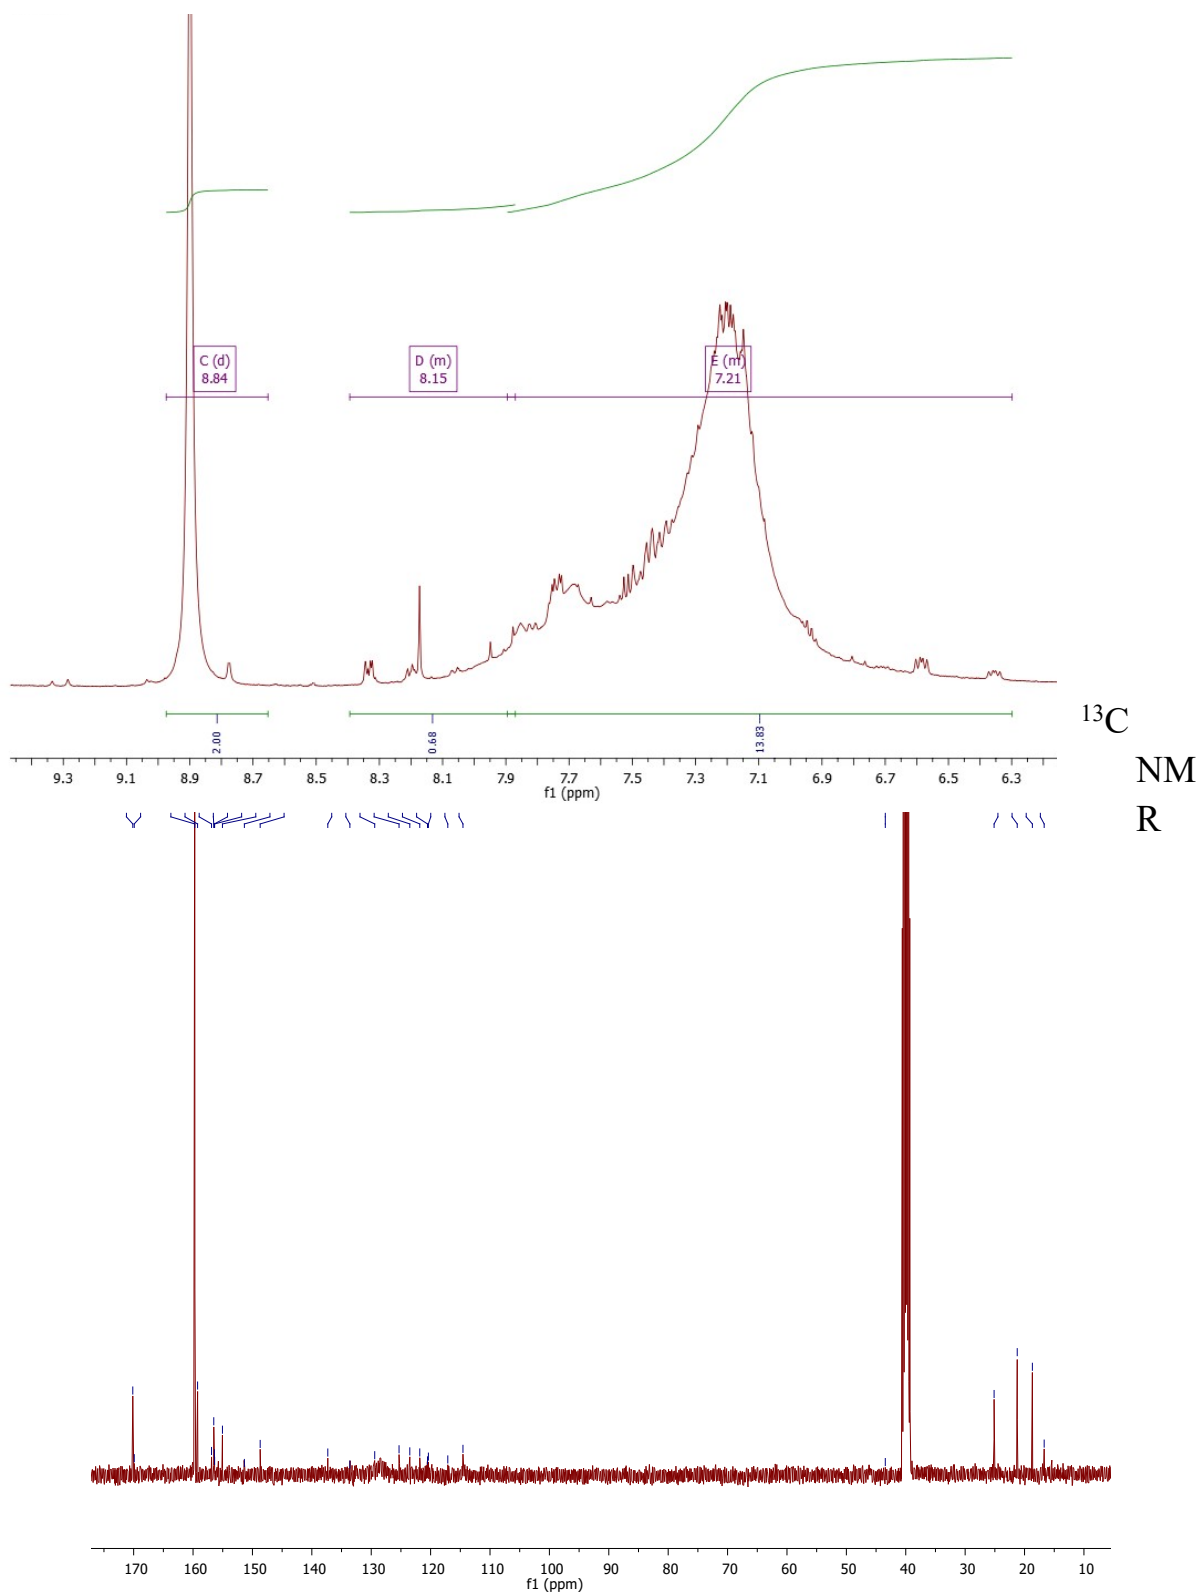

spectrum of compound **2d** in DMSO- $d_6$ .

MS Zoomed Spectrum

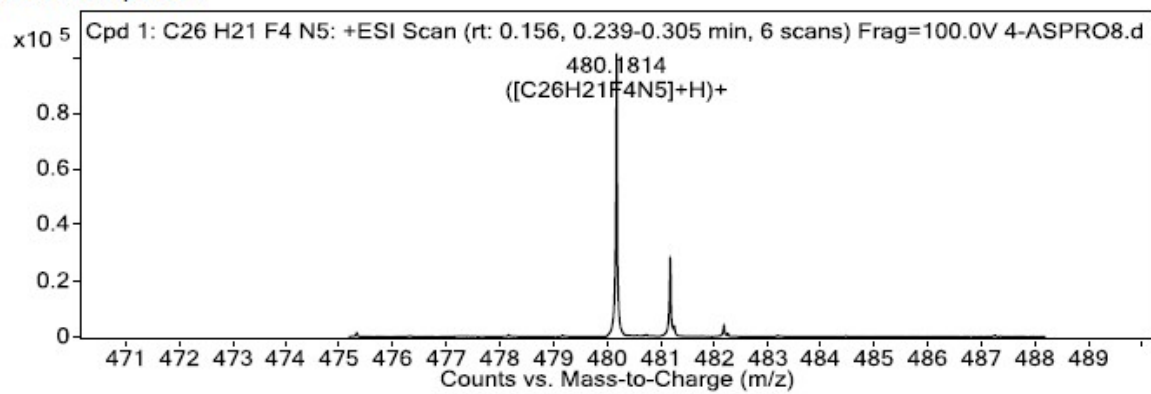

HRMS spectrum of compound **2d**.

<sup>1</sup>H NMR spectrum of compound **2f** in DMSO-d<sub>6</sub>.

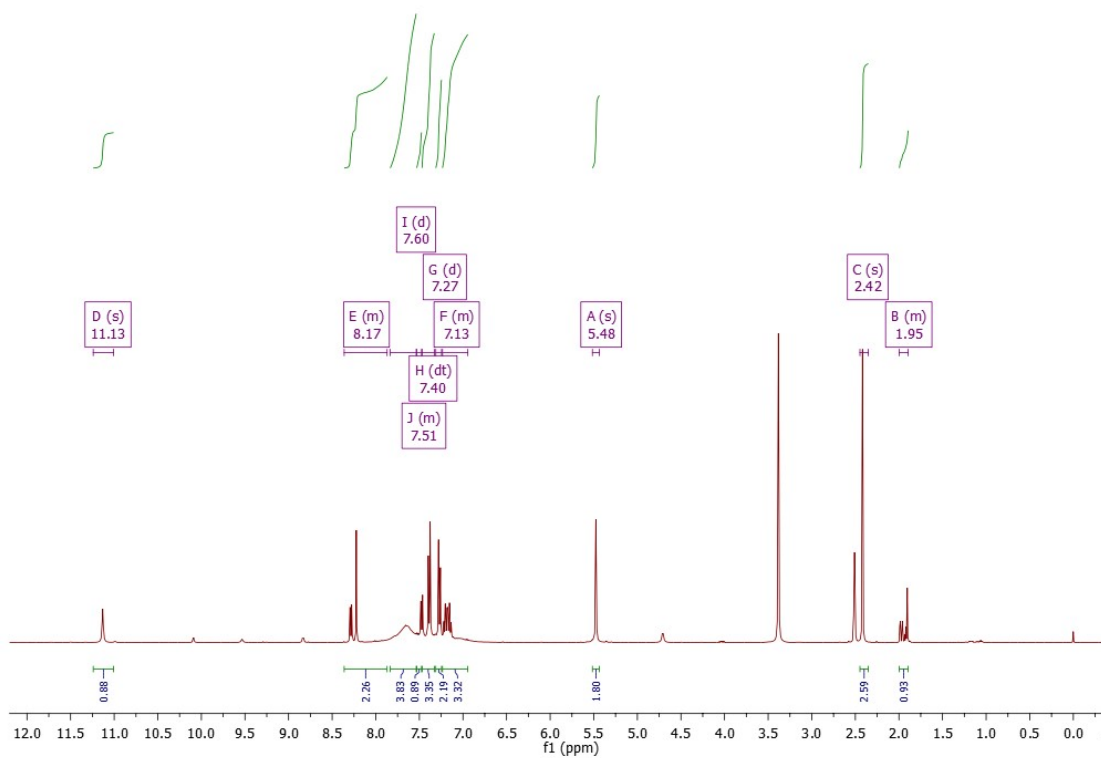

$^{13}\text{C}$

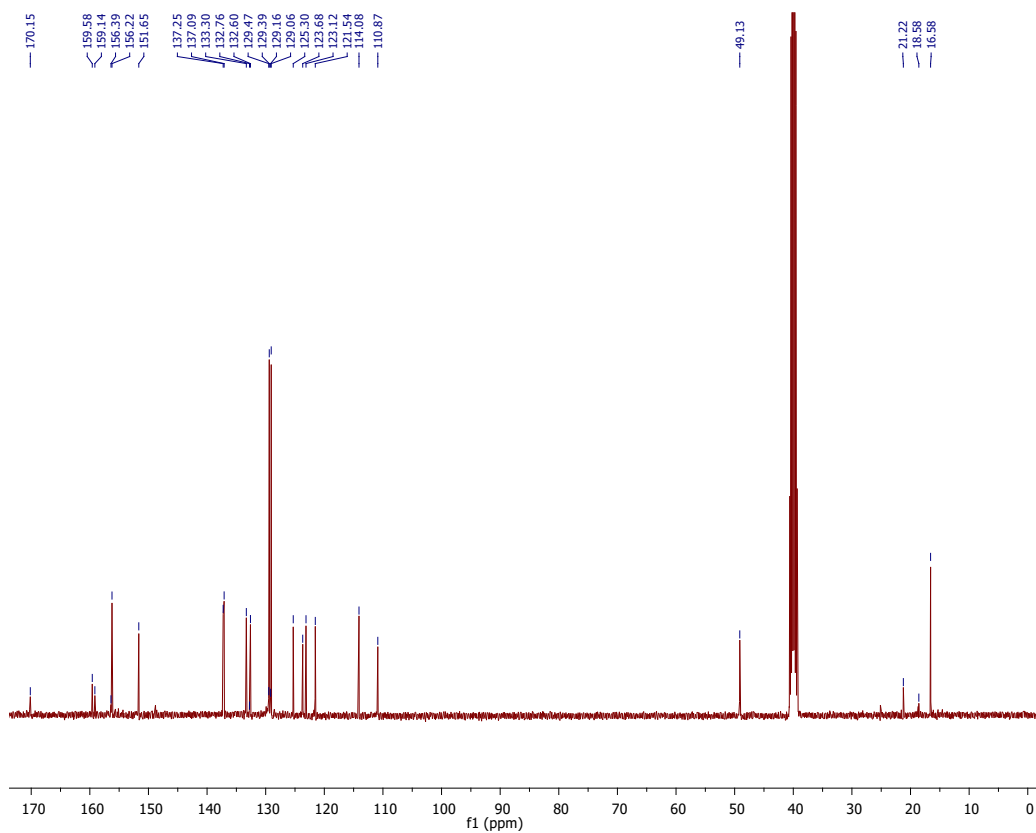

NMR spectrum of compound **2f** in  $\text{DMSO-d}_6$ .

MS Zoomed Spectrum

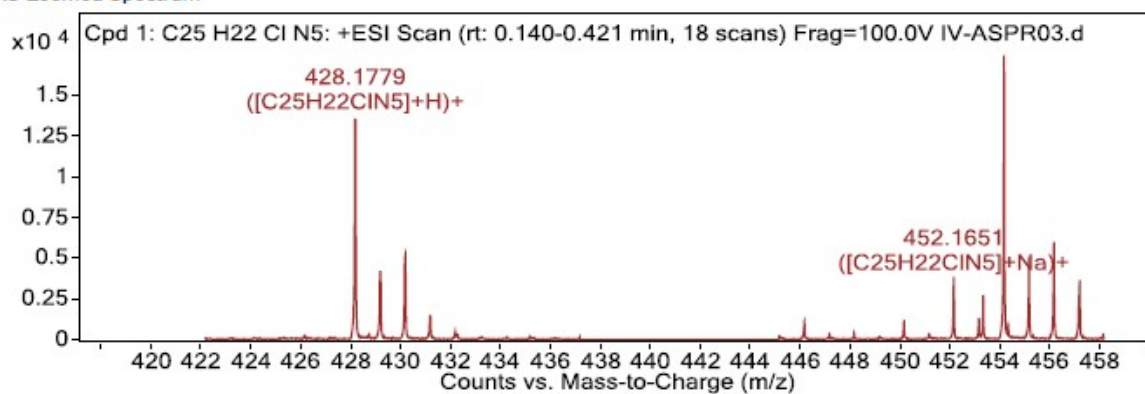

HRMS spectrum of compound **2f**.

<sup>1</sup>H NMR spectrum of compound **2g** in DMSO-d<sub>6</sub>.

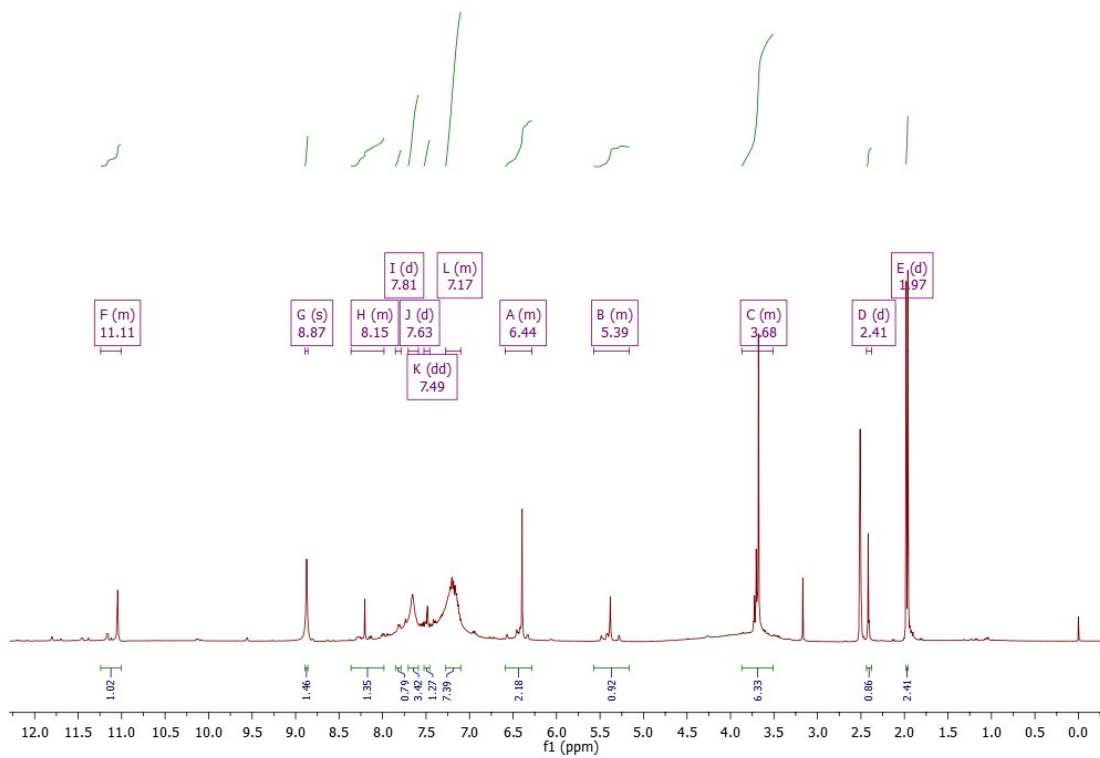

$^{13}\text{C}$

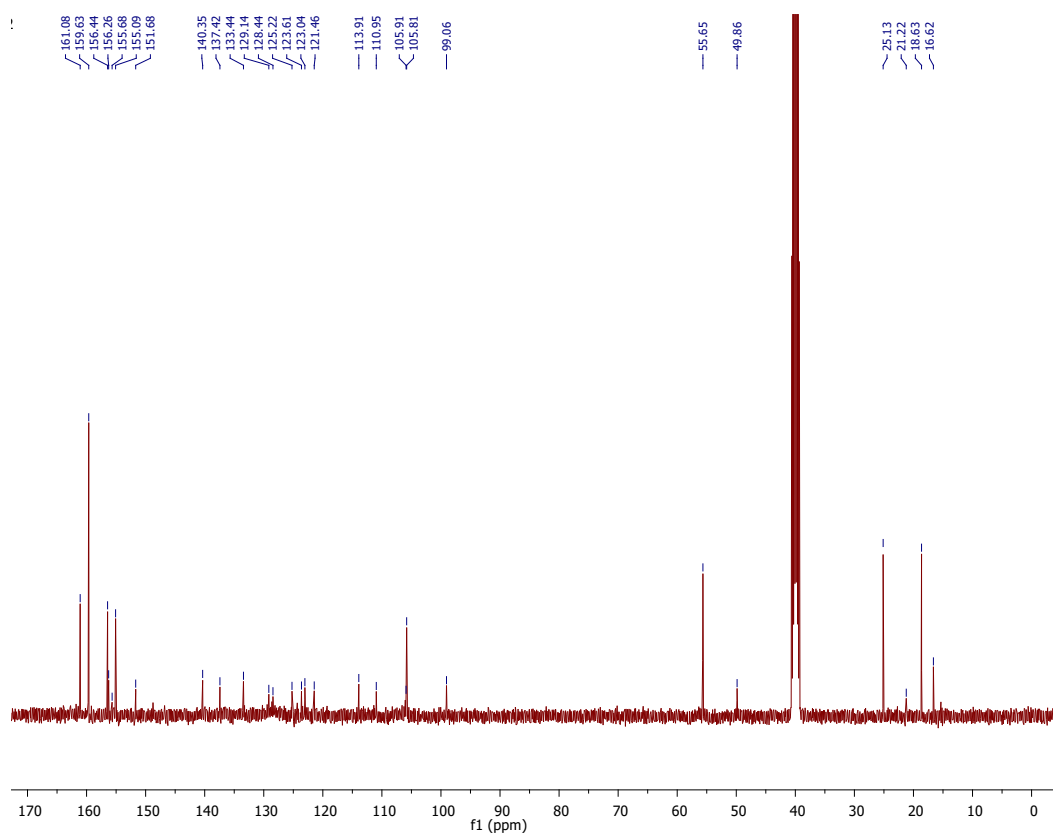

NMR spectrum of compound **2g** in  $\text{DMSO-d}_6$ .

MS Zoomed Spectrum

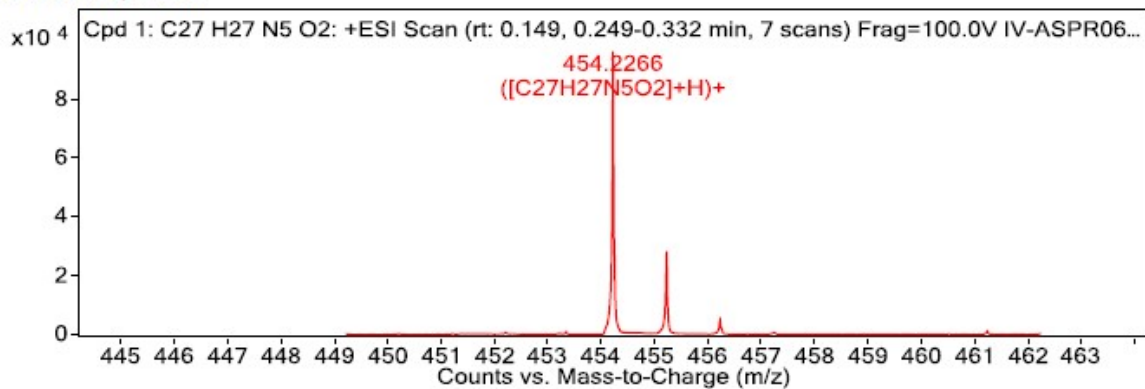

HRMS spectrum of compound **2g**.

<sup>1</sup>H NMR spectrum of compound **2h** in DMSO-d<sub>6</sub>.

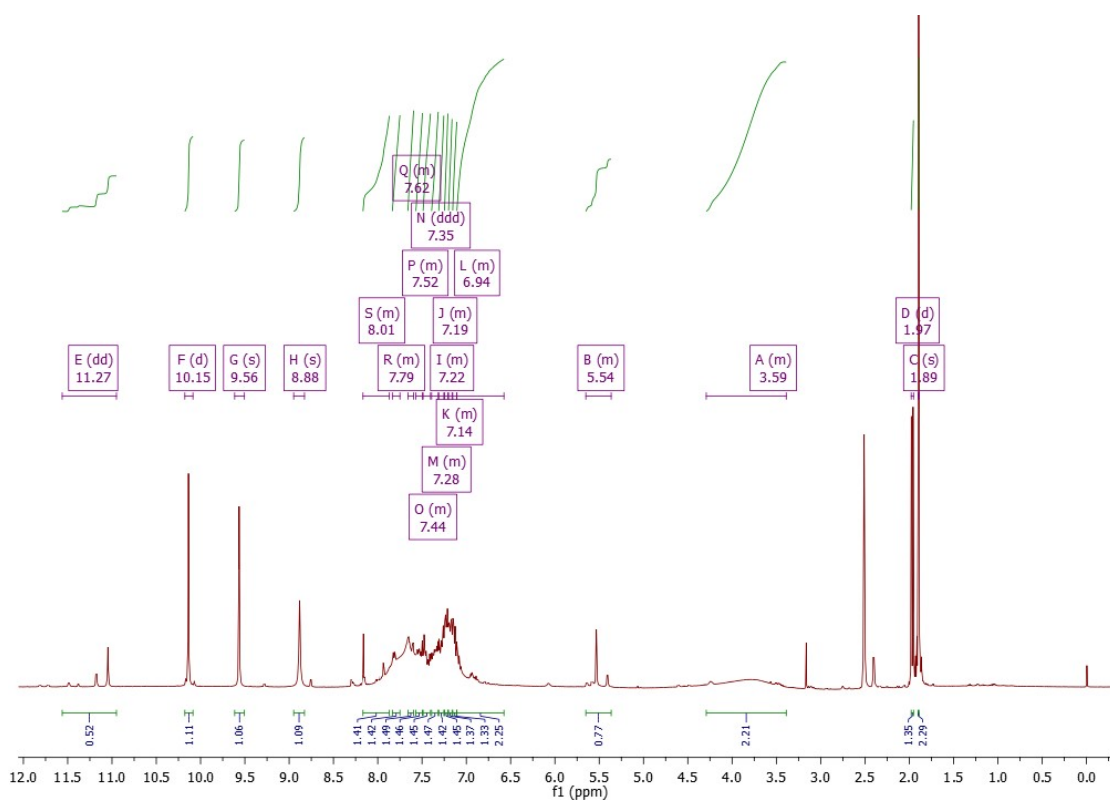

$^{13}\text{C}$

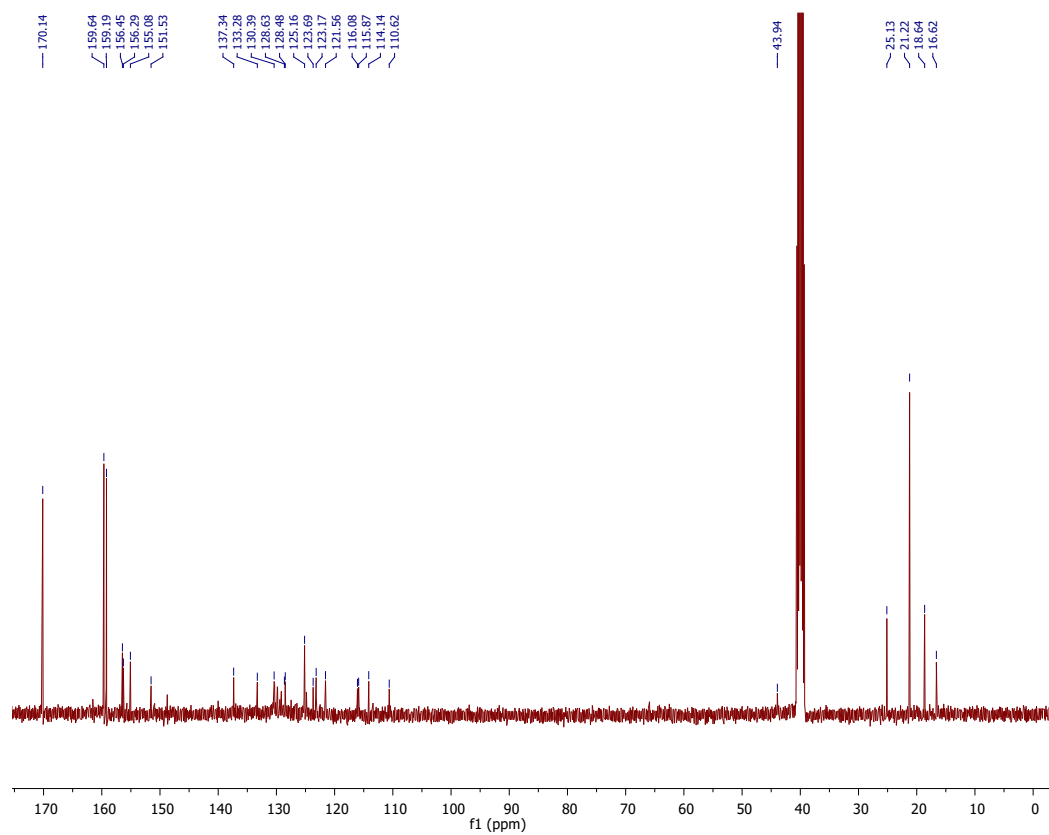

NMR spectrum of compound **2h** in  $\text{DMSO-d}_6$ .



MS Zoomed Spectrum

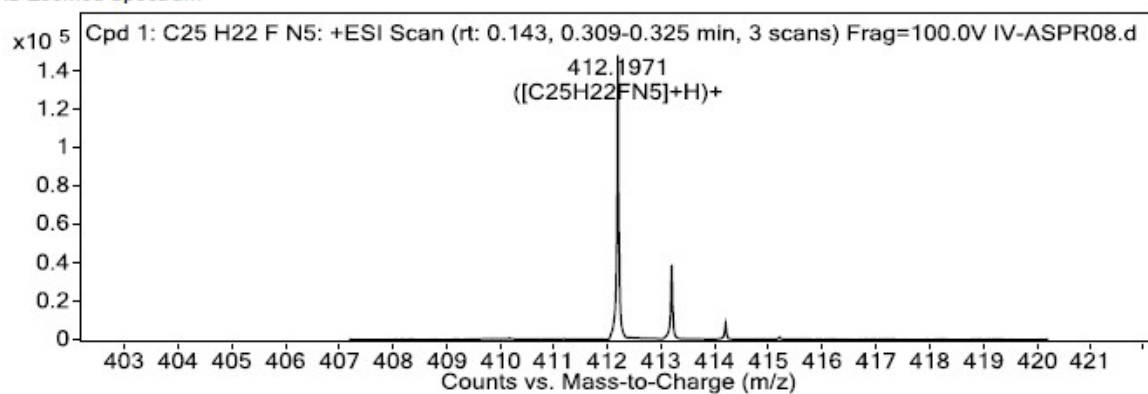

HRMS spectrum of compound **2h**.

<sup>1</sup>H NMR spectrum of compound **2i** in DMSO-d<sub>6</sub>.

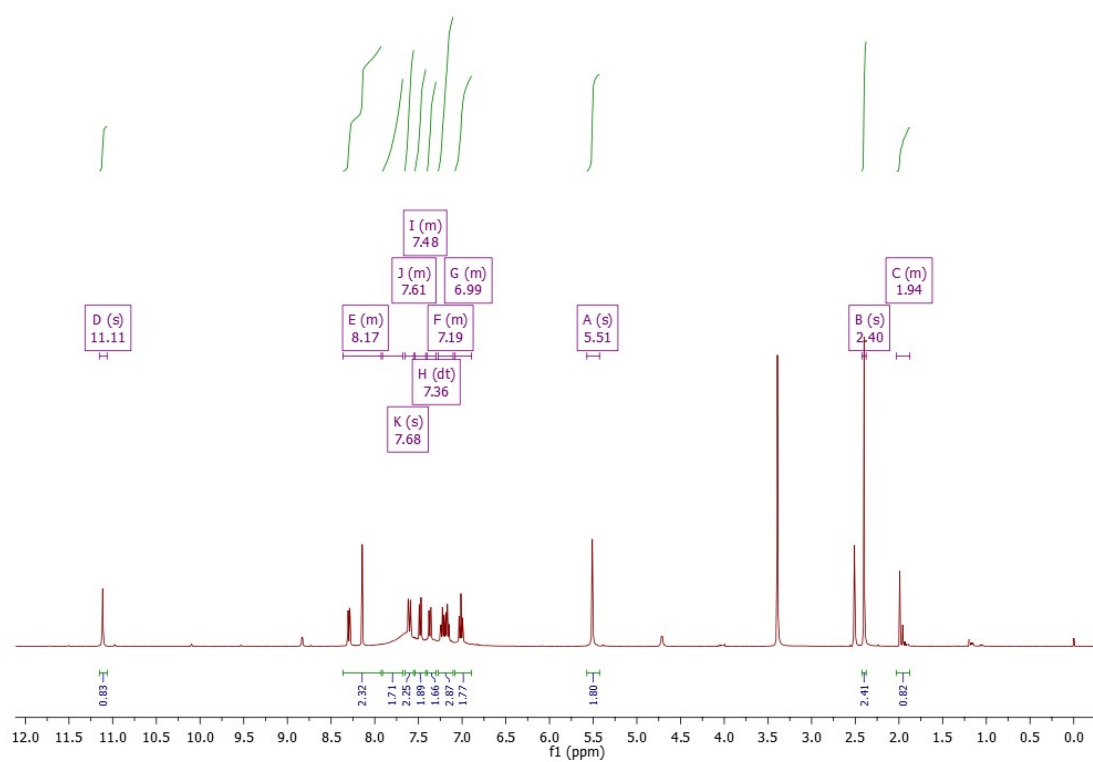

$^{13}\text{C}$

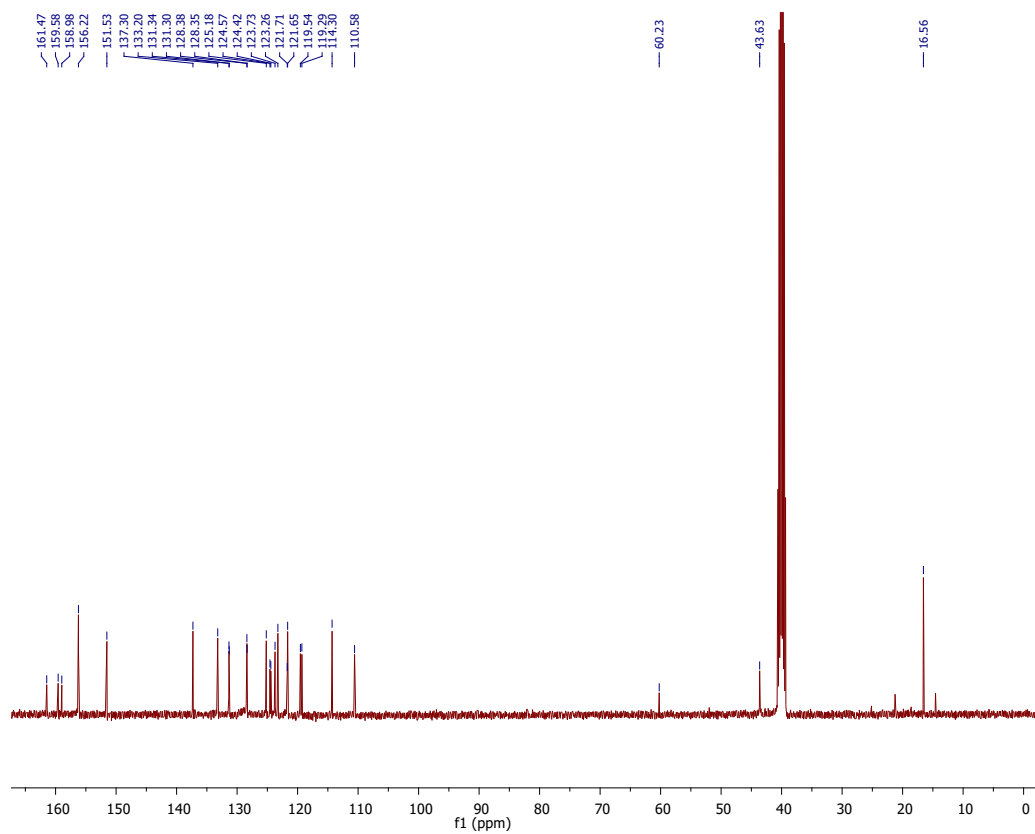

NMR spectrum of compound **2i** in DMSO- $d_6$ .

MS Zoomed Spectrum

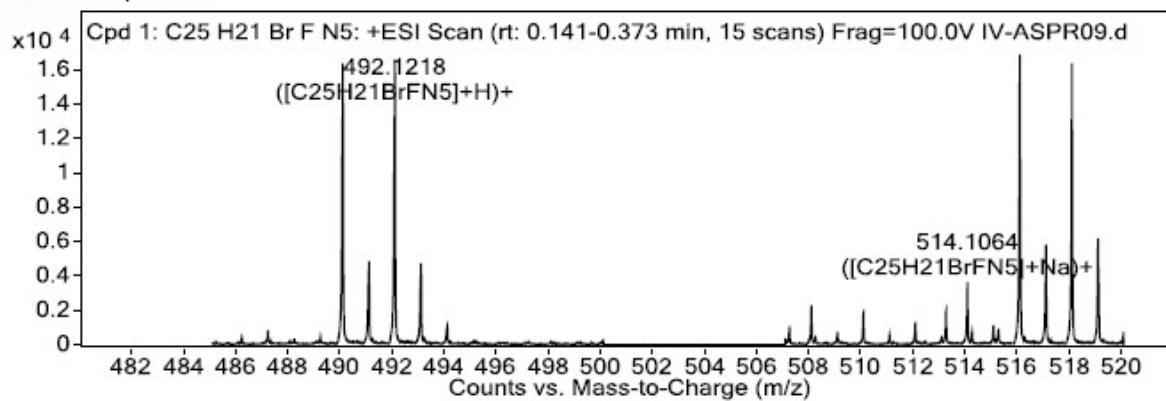

HRMS spectrum of compound **2i**.

<sup>1</sup>H NMR spectrum of compound **2j** in DMSO-d<sub>6</sub>.

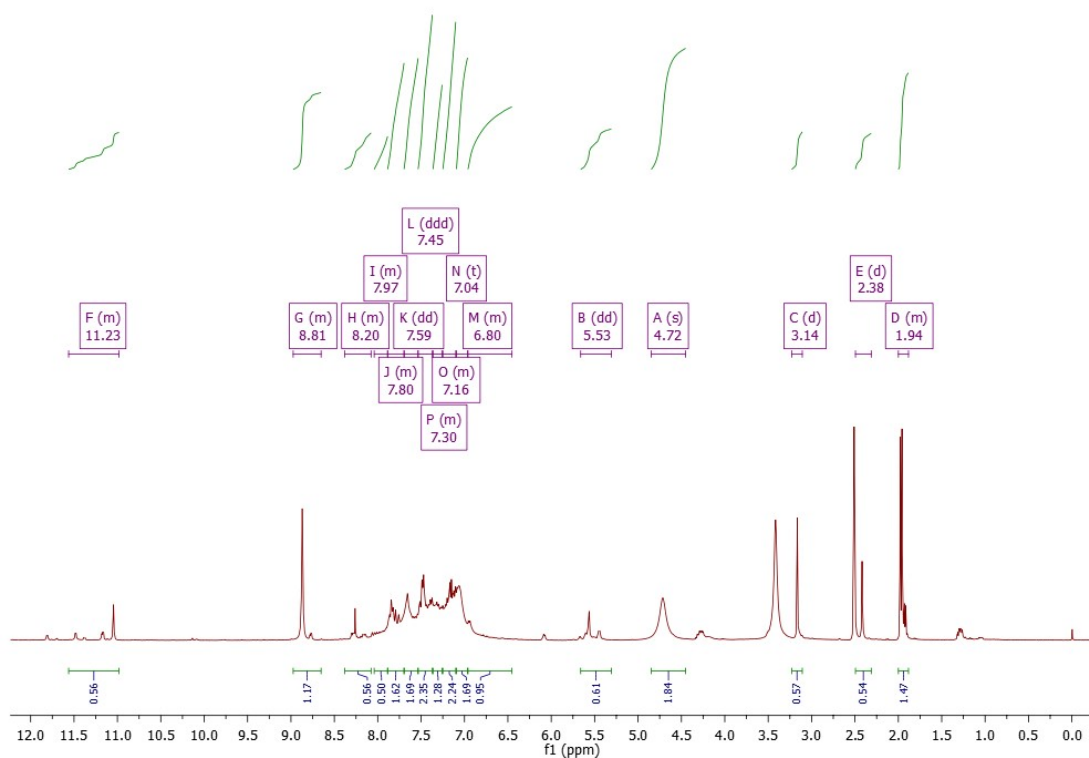

$^{13}\text{C}$  NMR spectrum of compound **2j** in  $\text{DMSO-d}_6$ .

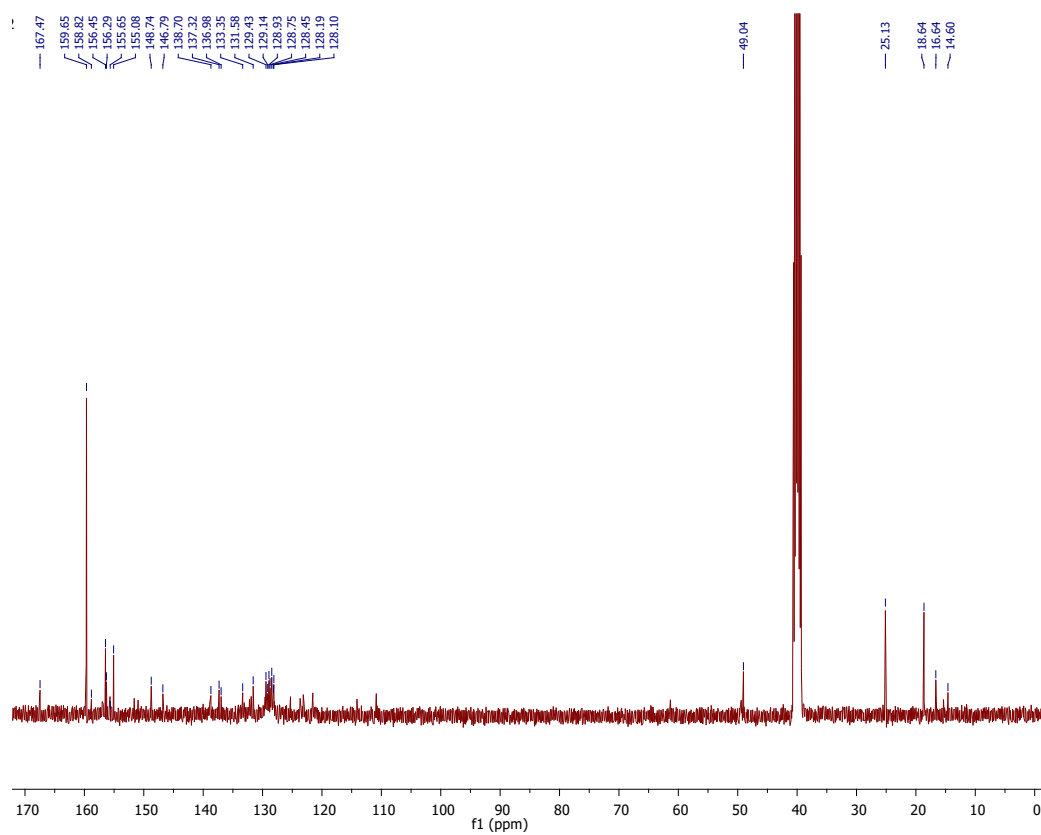

HRMS spectrum of compound **2j**.

MS Zoomed Spectrum

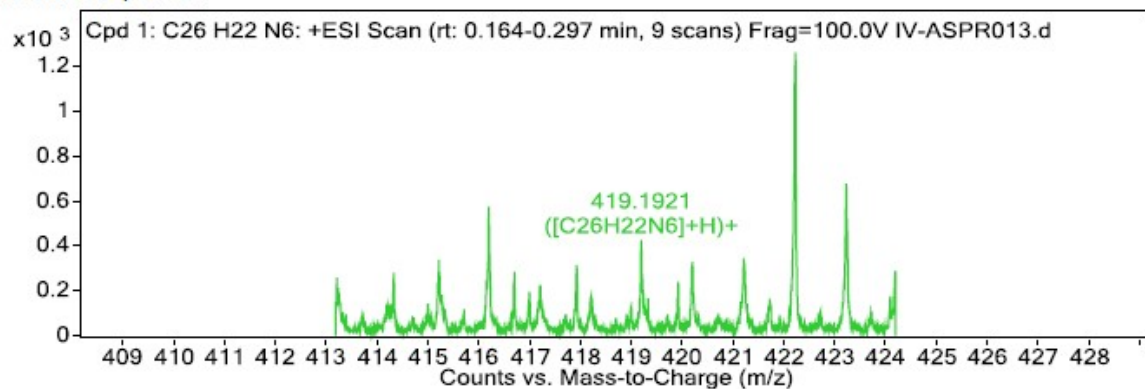

<sup>1</sup>H NMR spectrum of compound **3a** in DMSO-d<sub>6</sub>.

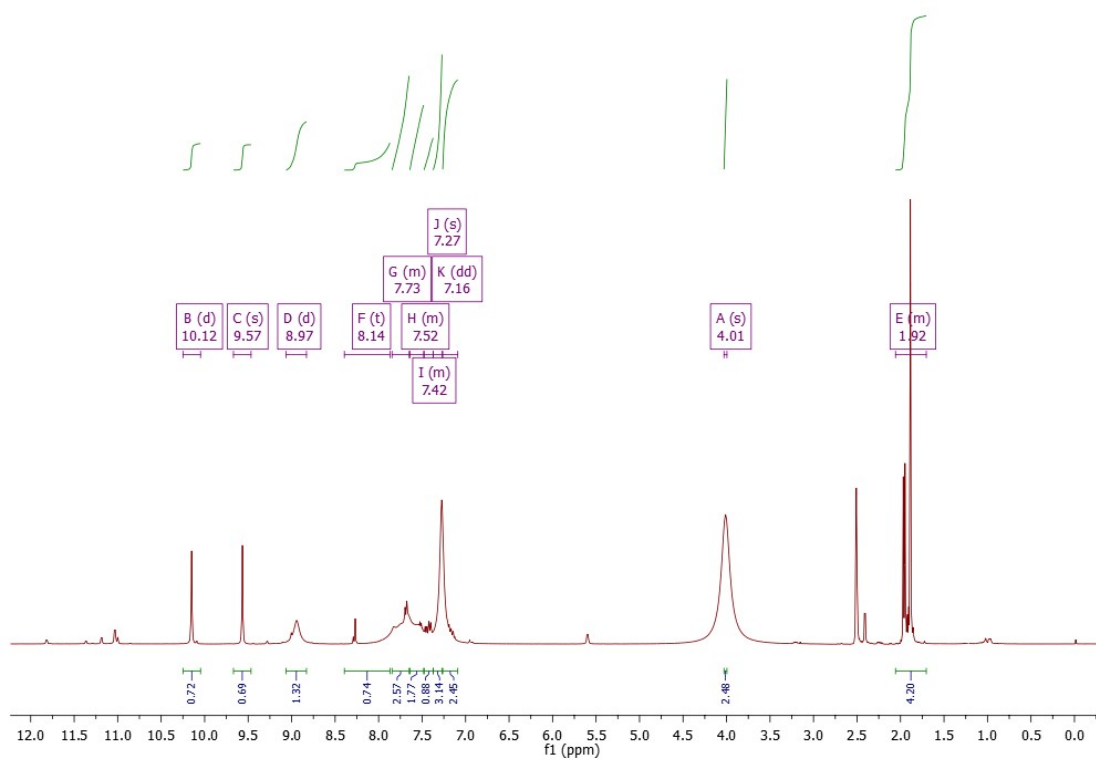

$^{13}\text{C}$

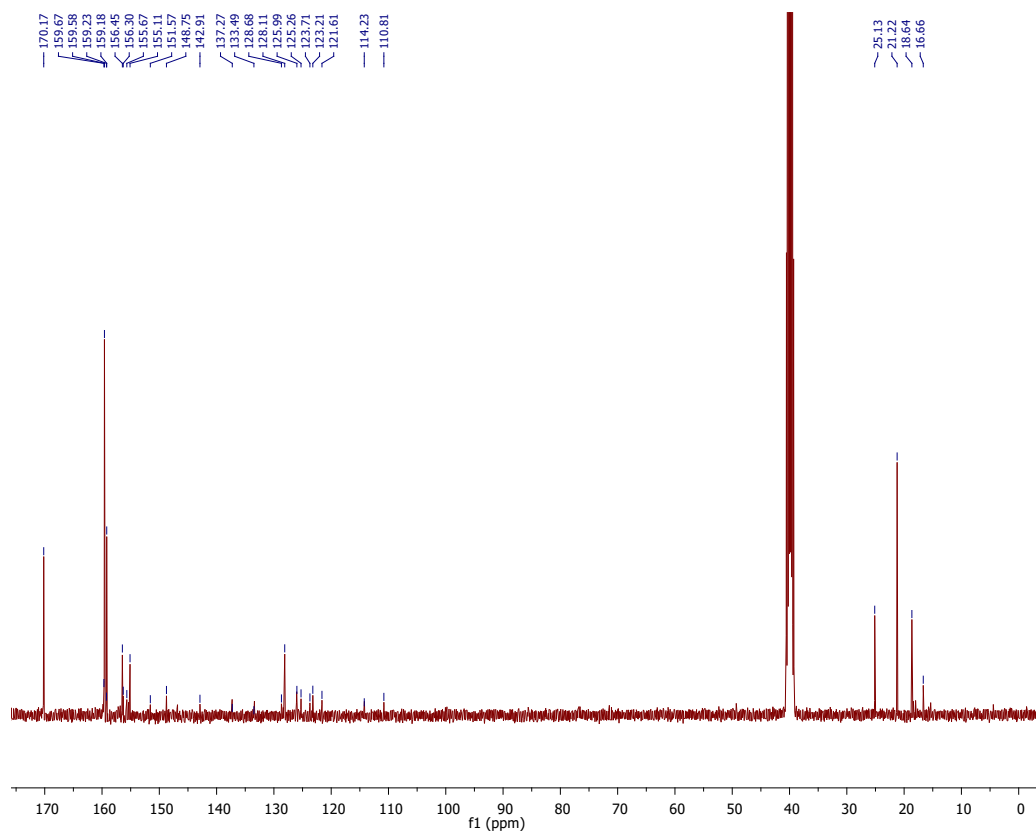

NMR spectrum of compound **3a** in DMSO- $d_6$ .

MS Zoomed Spectrum

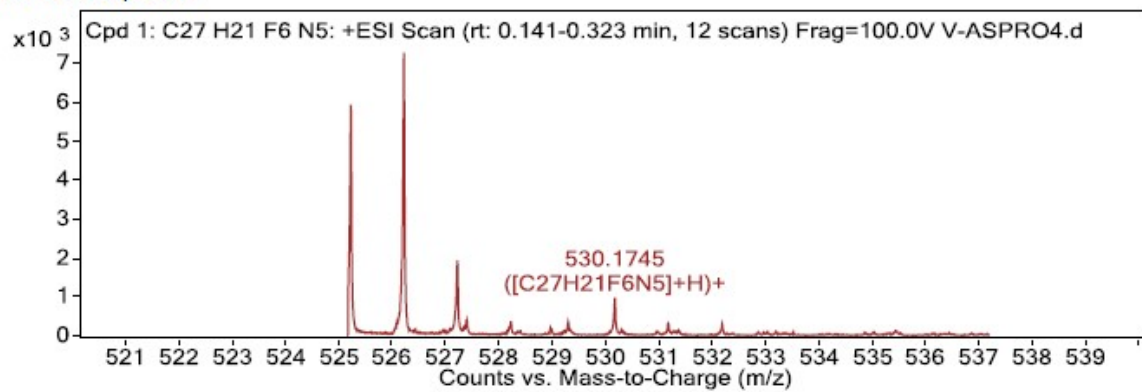

HRMS spectrum of compound **3a**.

<sup>1</sup>H NMR spectrum of compound **3b** in DMSO-d<sub>6</sub>.

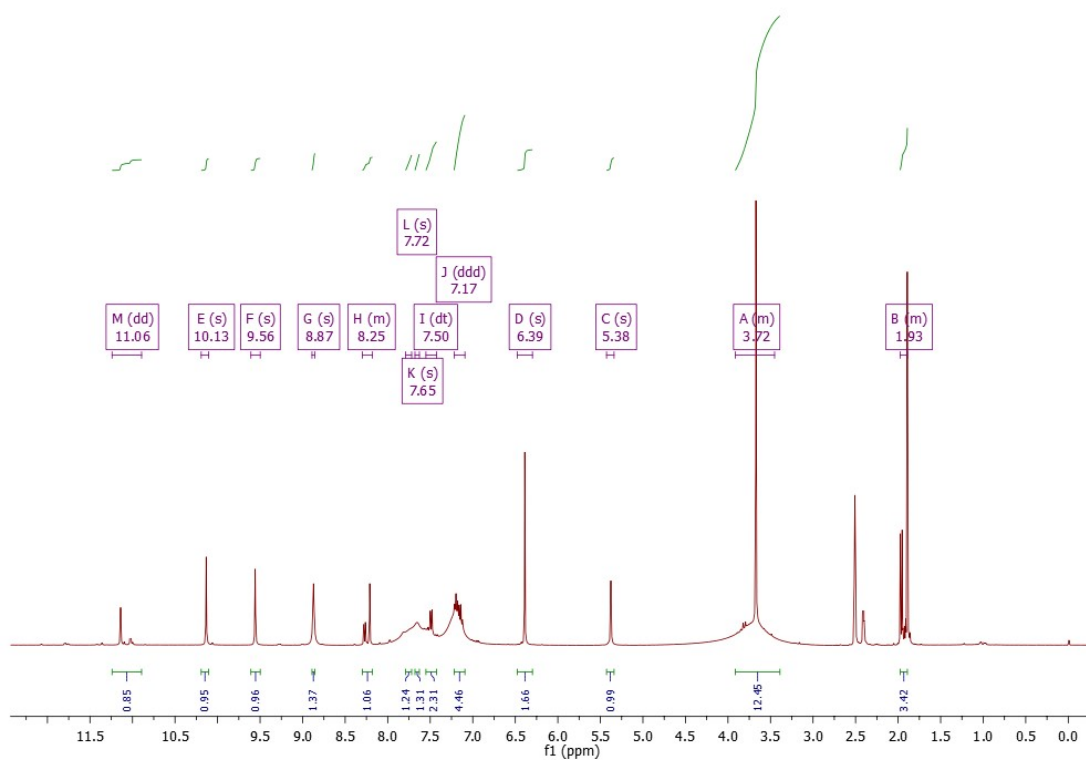

$^{13}\text{C}$

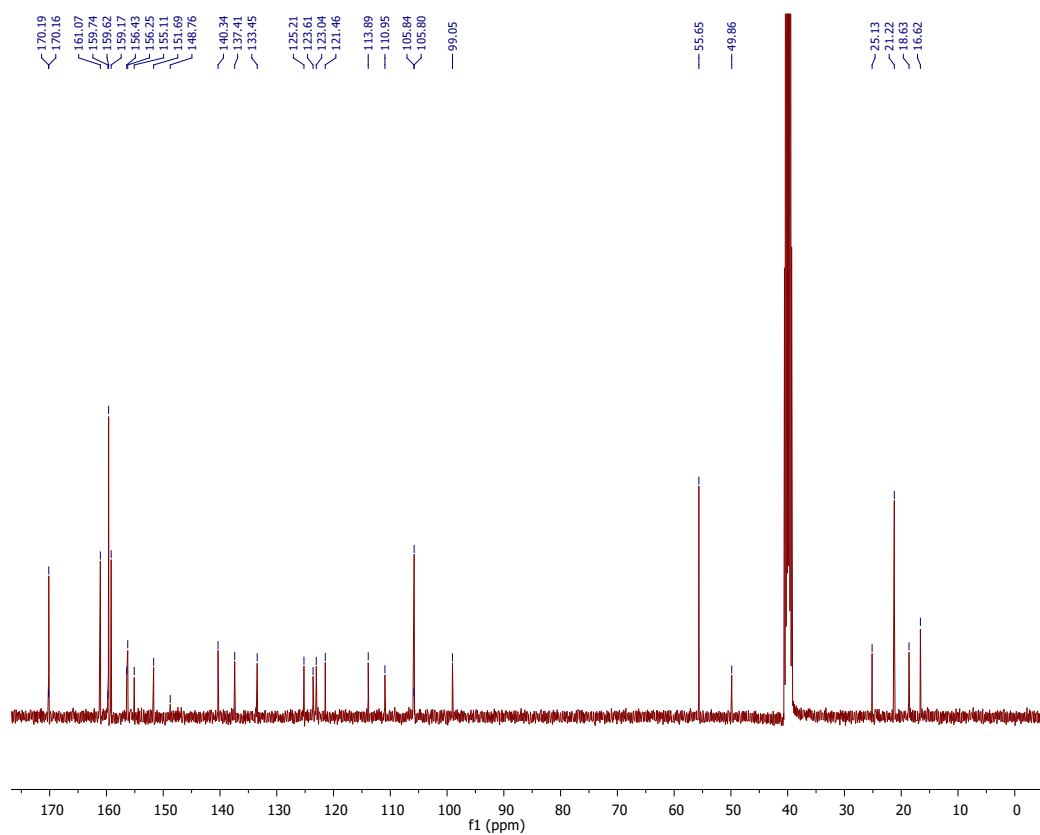

NMR spectrum of compound **3b** in  $\text{DMSO-d}_6$ .



MS Zoomed Spectrum

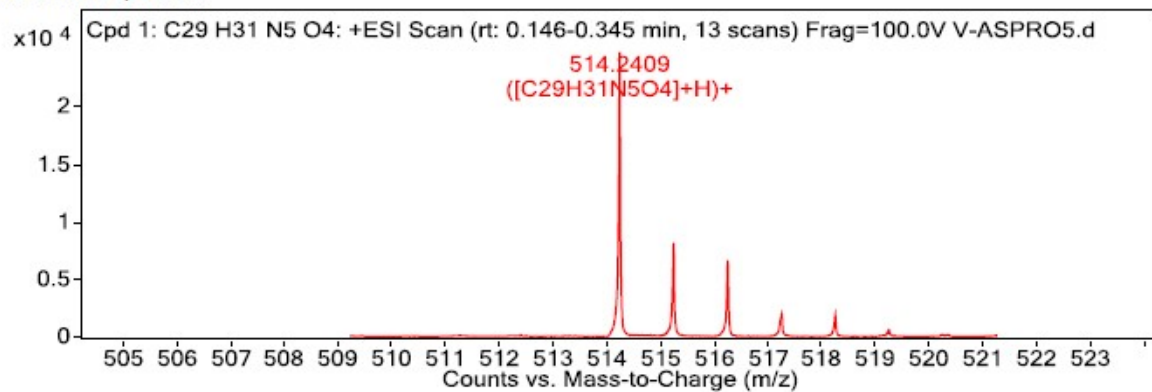

HRMS spectrum of compound **3b**.

<sup>1</sup>H NMR spectrum of compound **3c** in DMSO-d<sub>6</sub>.

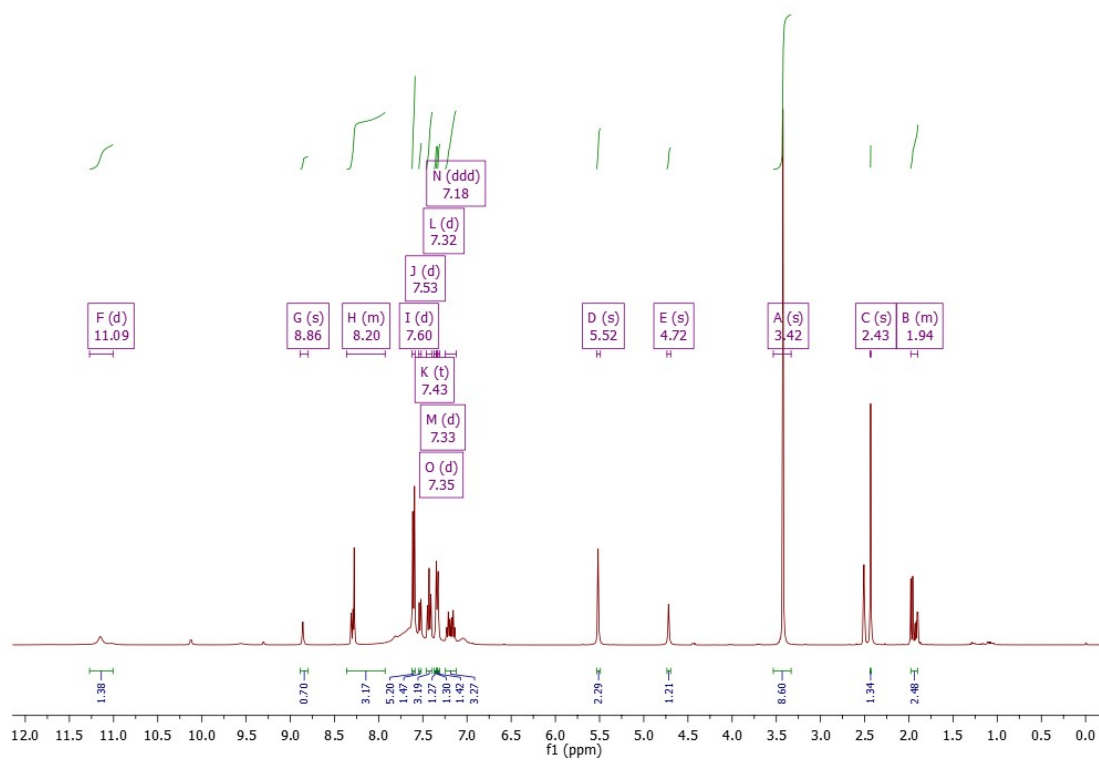

$^{13}\text{C}$

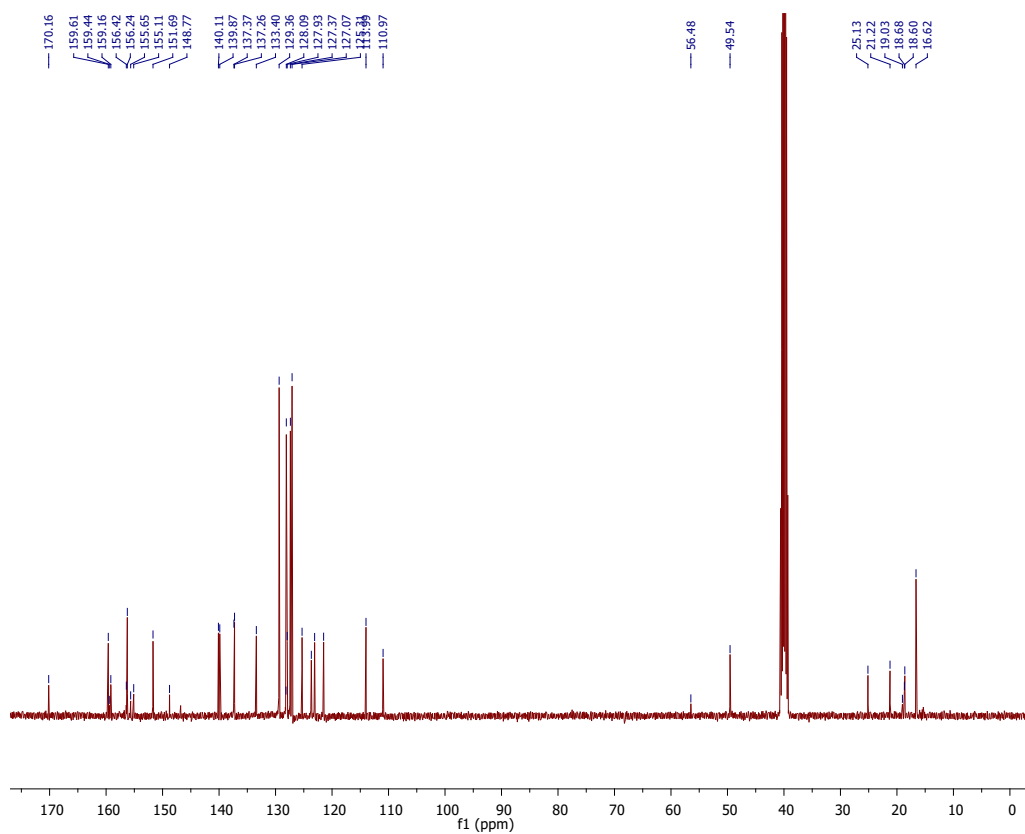

NMR spectrum of compound **3c** in  $\text{DMSO-d}_6$ .

## HRMS spectrum of compound **3c**.

MS Zoomed Spectrum

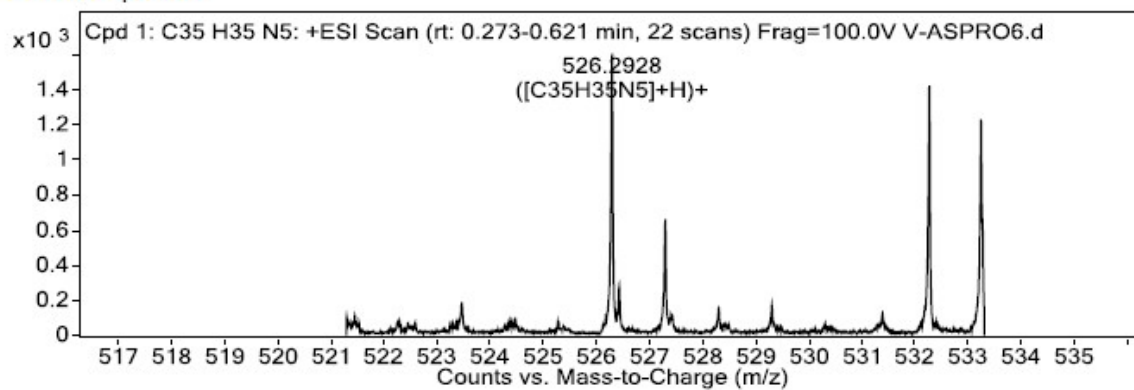

## <sup>1</sup>H NMR spectrum of compound **3d** in DMSO-d<sub>6</sub>.

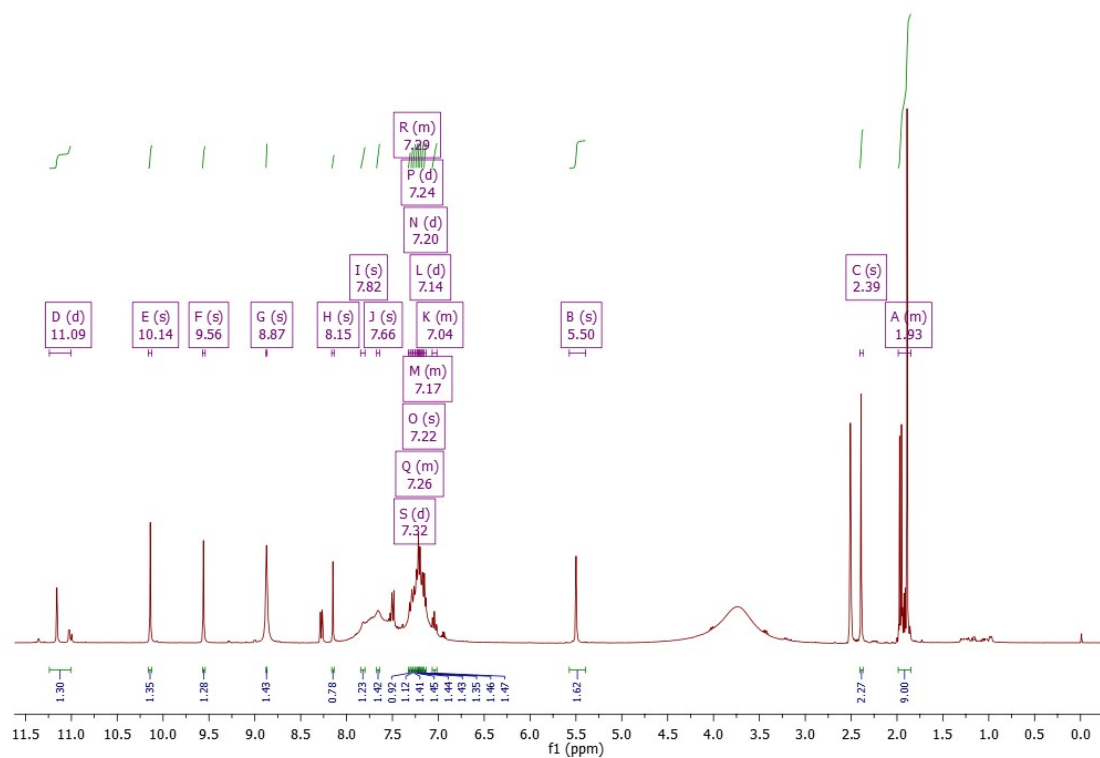

$^{13}\text{C}$

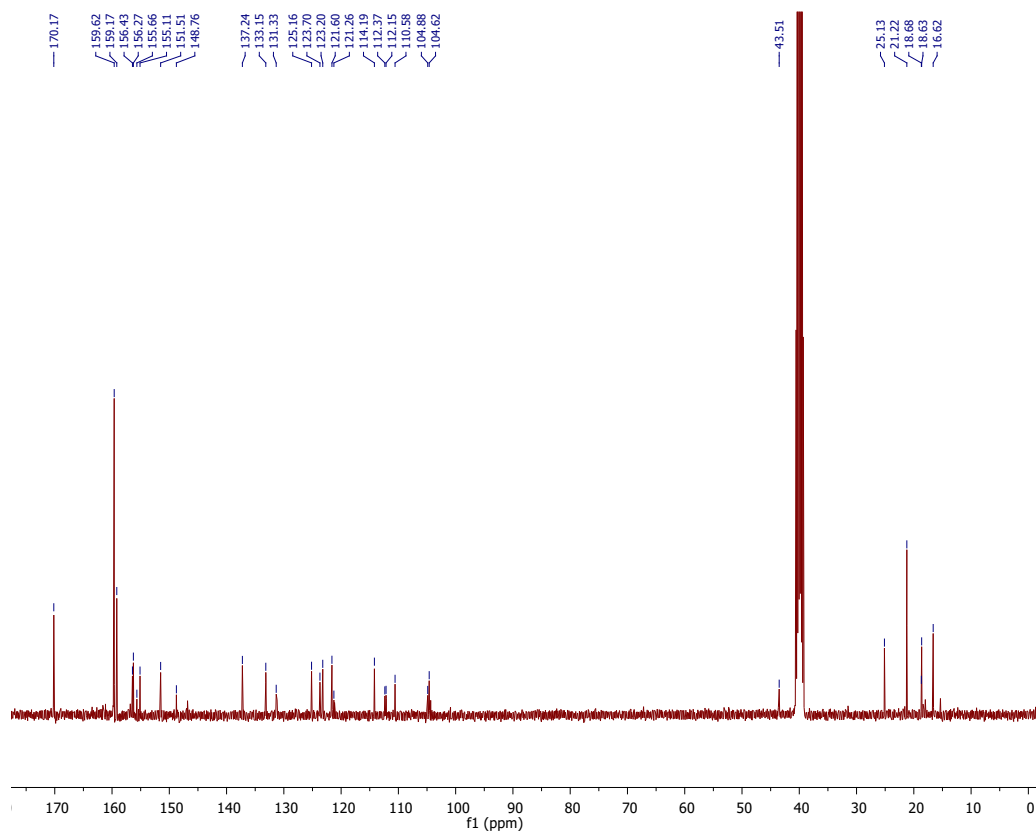

NMR spectrum of compound **3d** in  $\text{DMSO-d}_6$ .

## HRMS spectrum of compound **3d**.

MS Zoomed Spectrum

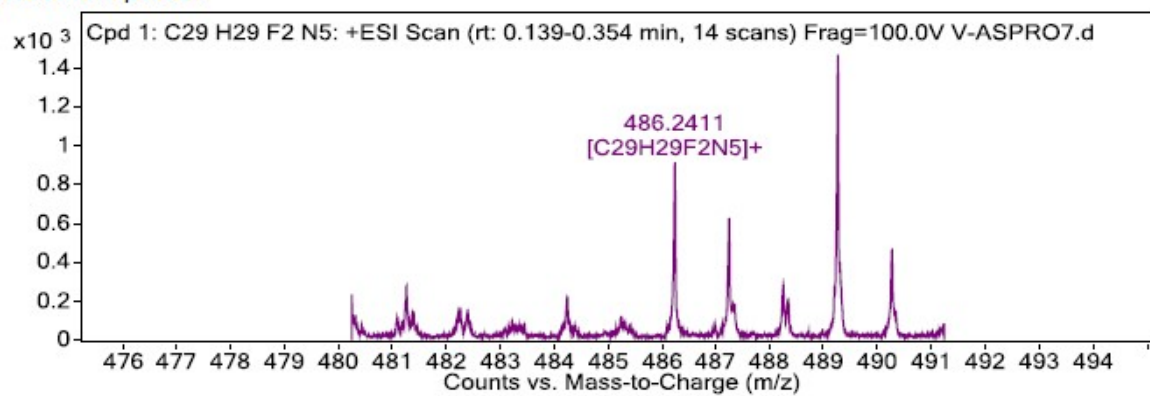

## <sup>1</sup>H NMR spectrum of compound **3e** in DMSO-d<sub>6</sub>.

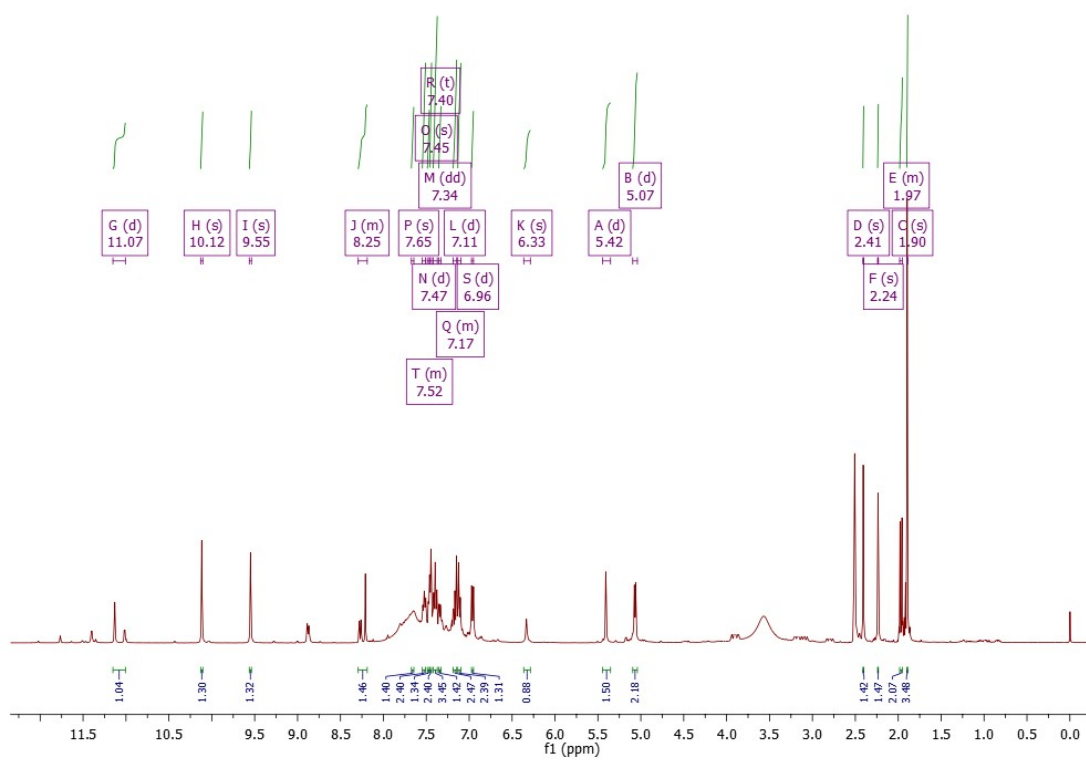

$^{13}\text{C}$

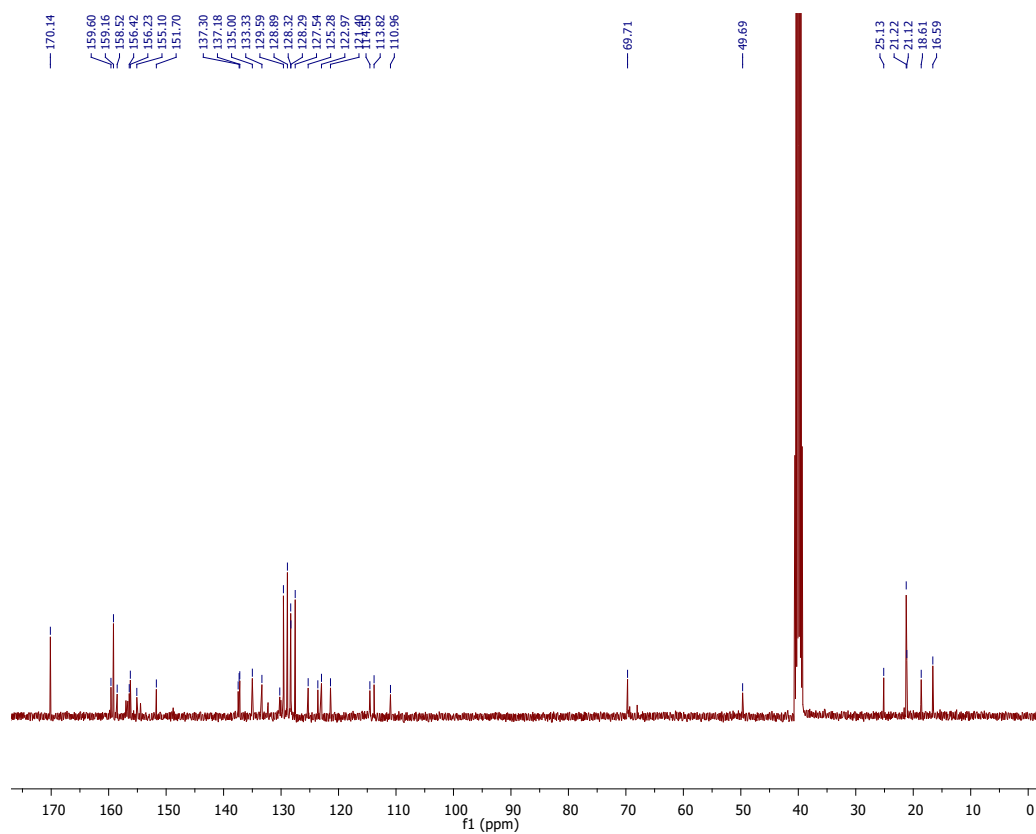

NMR spectrum of compound **3e** in DMSO- $\text{d}_6$ .

MS Zoomed Spectrum

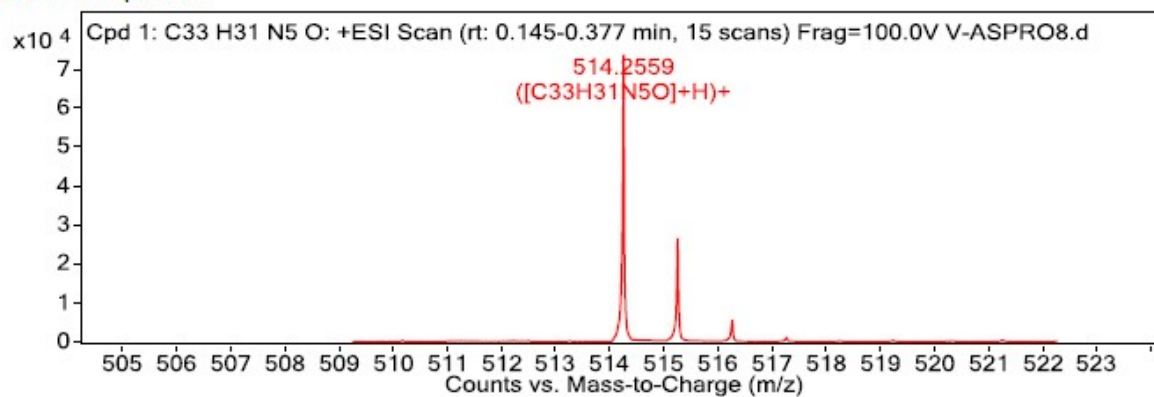

HRMS spectrum of compound **3e**.

<sup>1</sup>H NMR spectrum of compound **3f** in DMSO-d<sub>6</sub>.

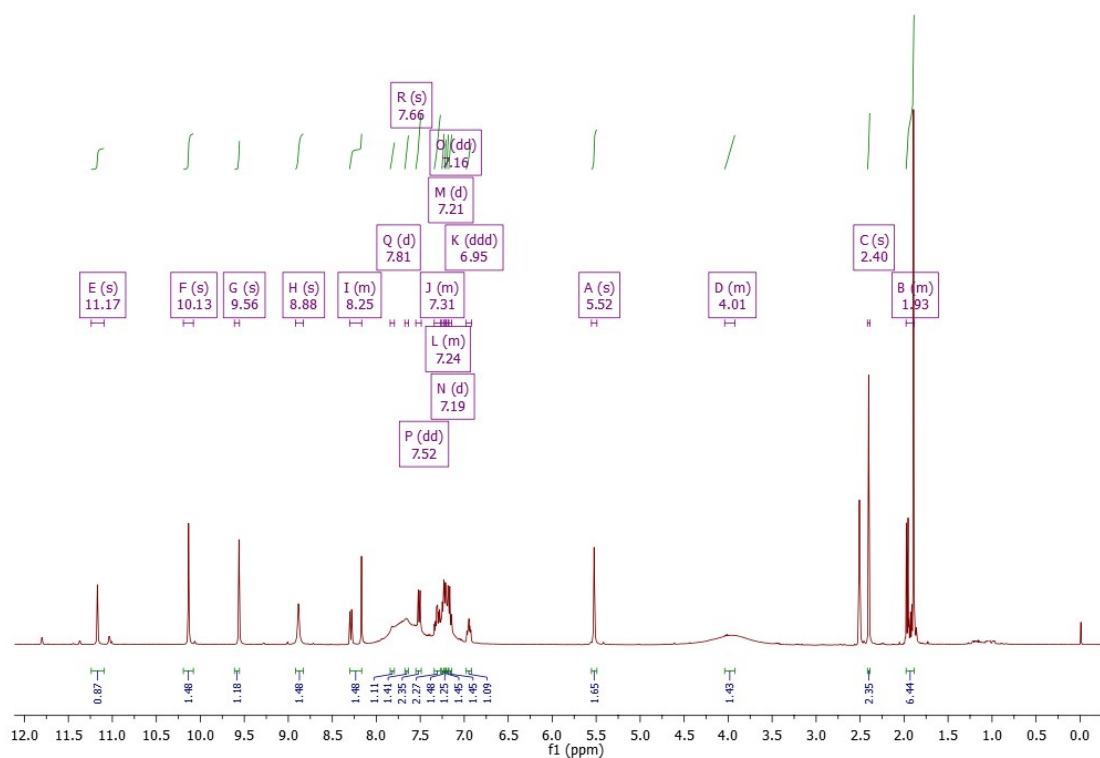

$^{13}\text{C}$  NMR spectrum of compound **3f** in  $\text{DMSO-d}_6$ .

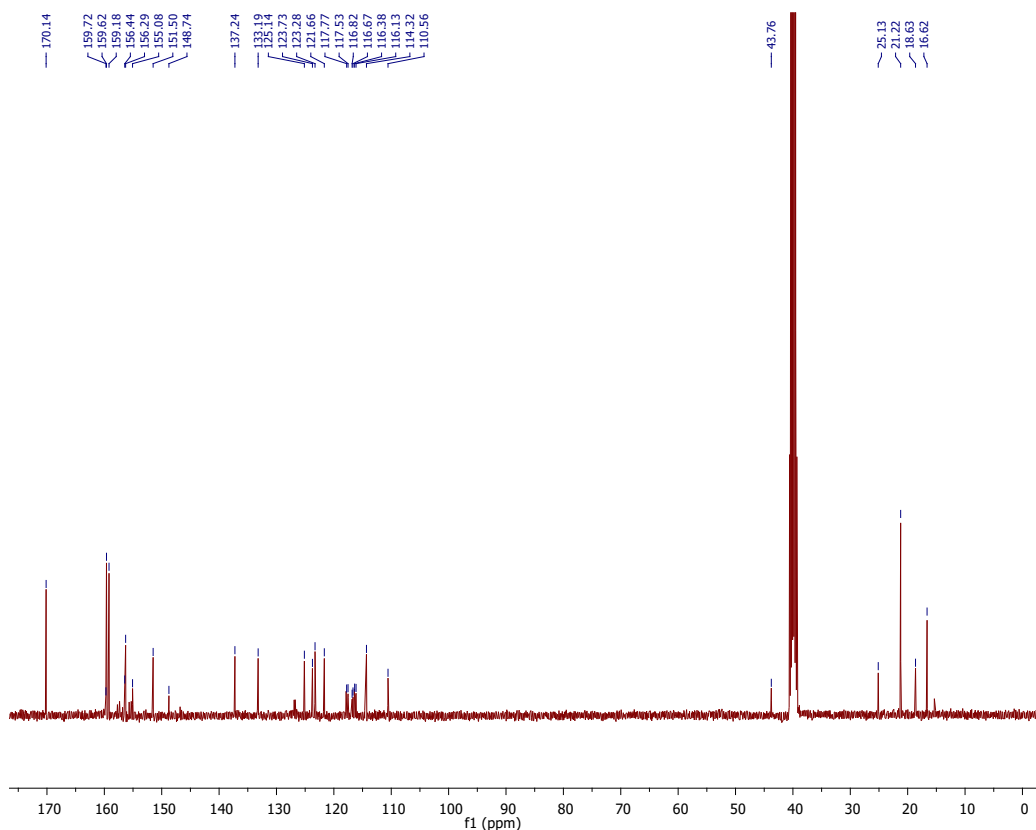

HRMS spectrum of compound **3f**.

MS Zoomed Spectrum

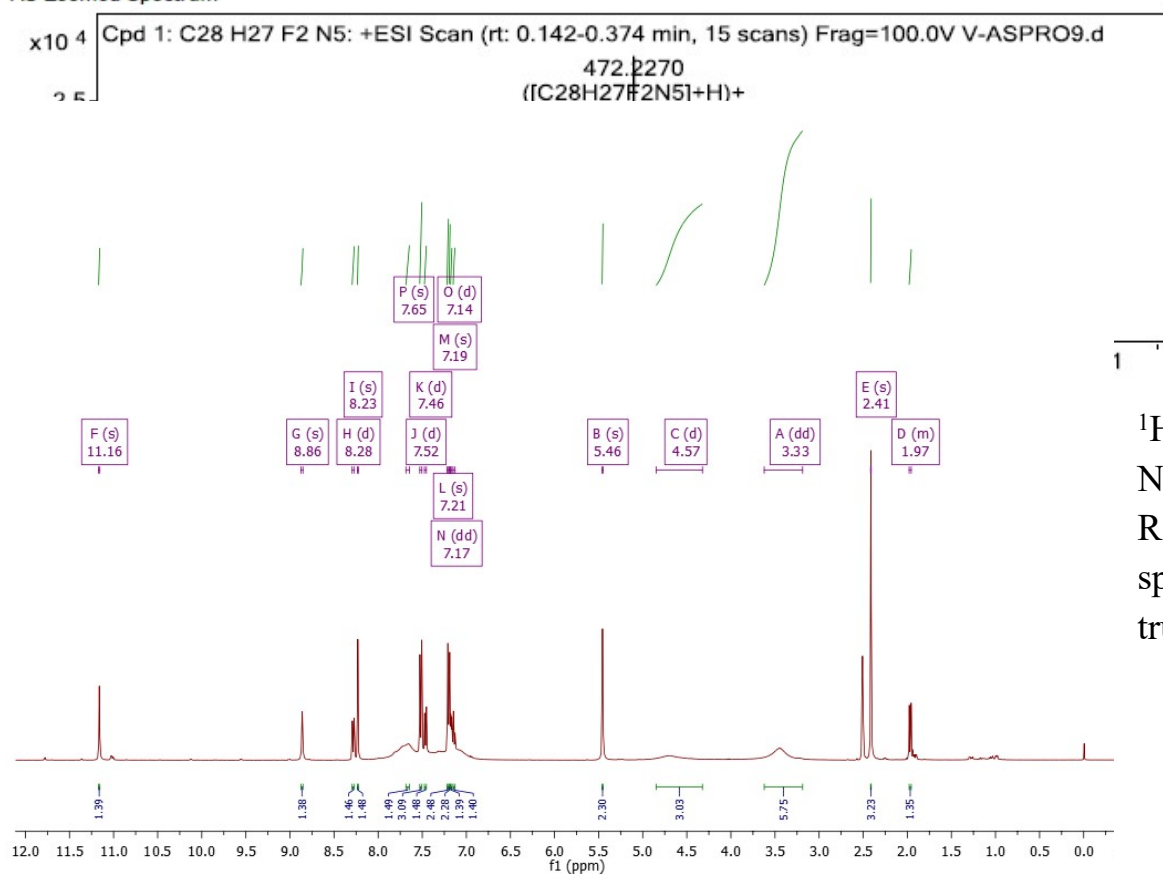

$^1\text{H}$   
NMR  
spec  
trum



of compound **3g** in DMSO-d<sub>6</sub>.

$^{13}\text{C}$

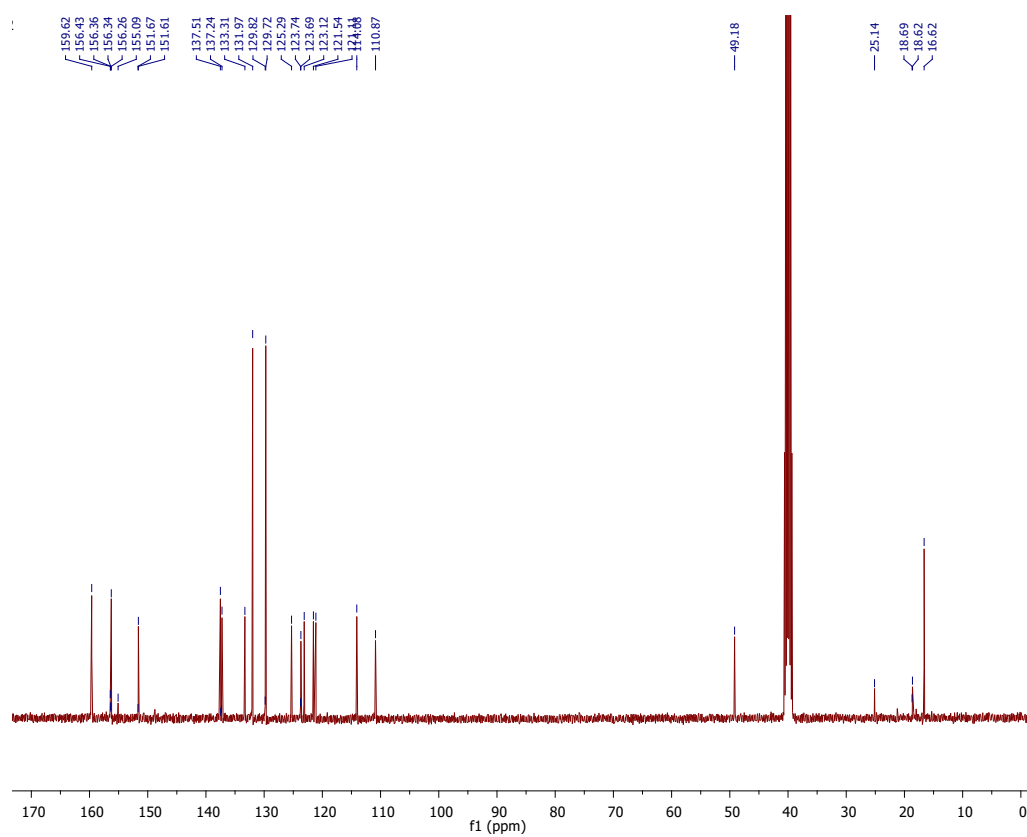

NMR spectrum of compound **3g** in  $\text{DMSO-d}_6$ .

MS Zoomed Spectrum

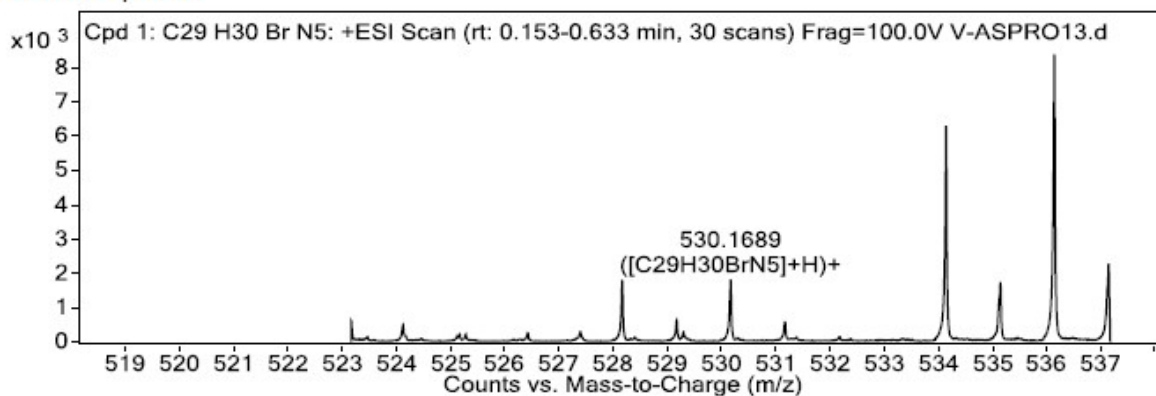

HRMS spectrum of compound **3g**.

<sup>1</sup>H NMR spectrum of compound **3h** in DMSO-d<sub>6</sub>.

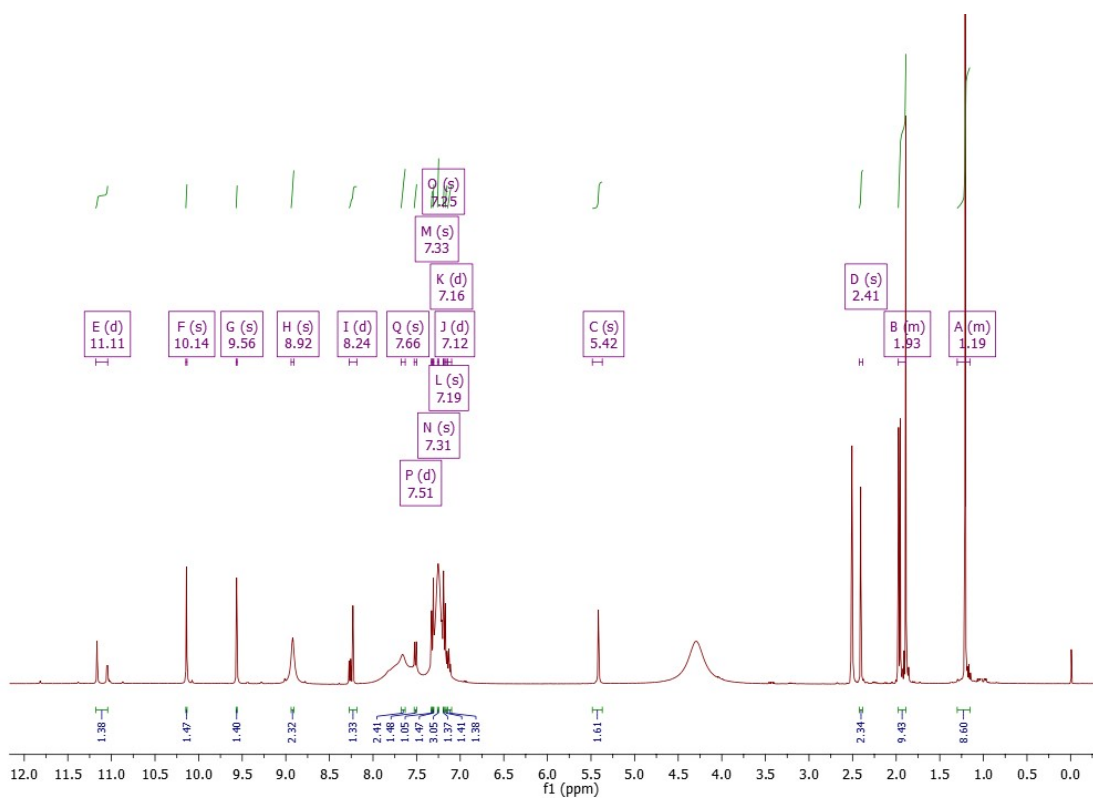

$^{13}\text{C}$  NMR spectrum of compound **3h** in  $\text{DMSO-d}_6$ .

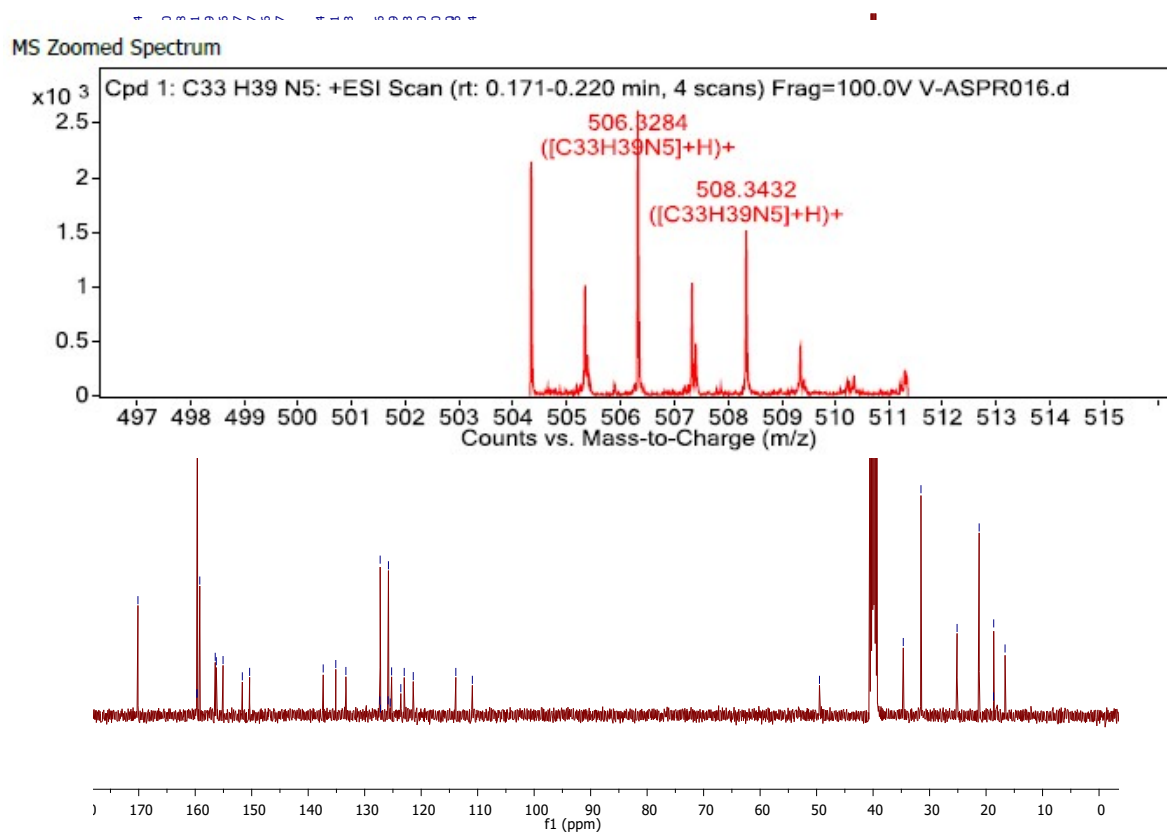

HRMS spectrum of compound **3h**.

$^1\text{H}$  NMR spectrum of compound **3i** in  $\text{DMSO-d}_6$ .

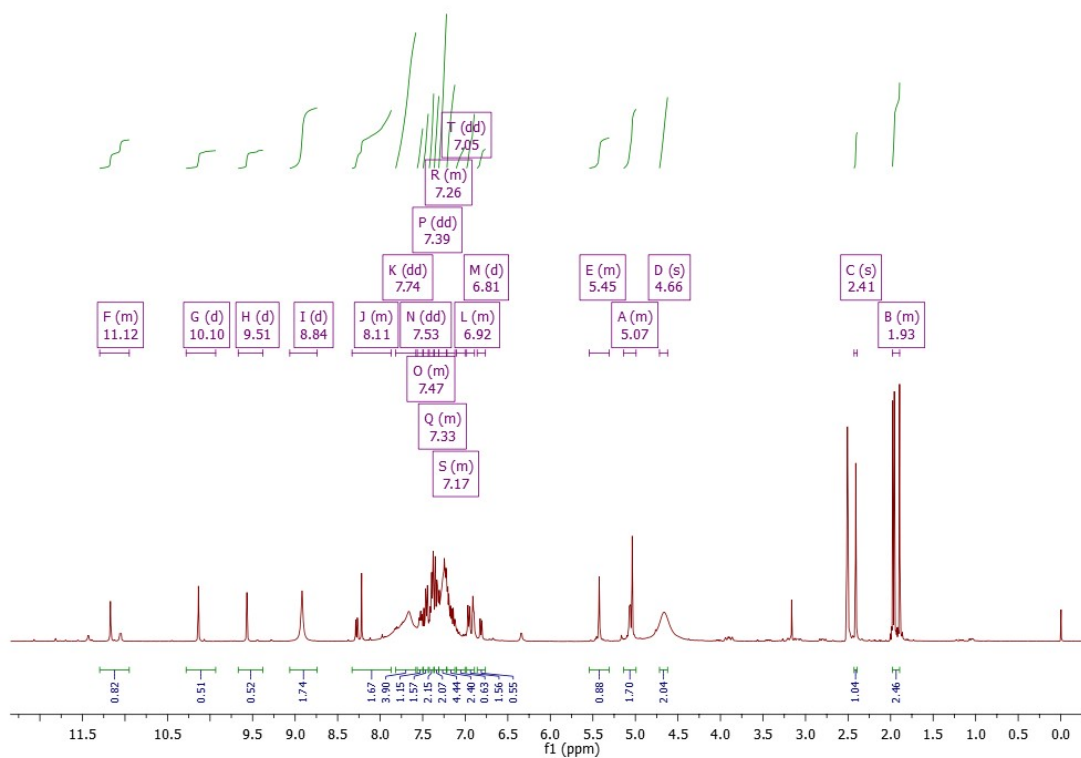

$^{13}\text{C}$

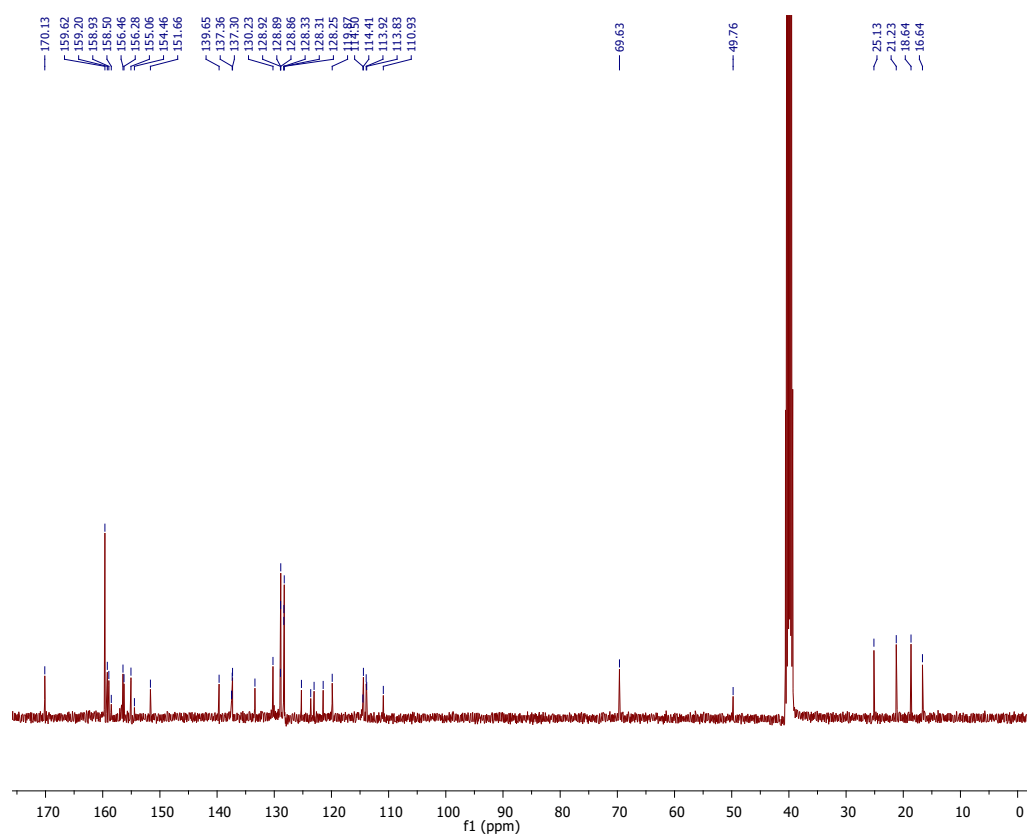

NMR spectrum of compound **3i** in DMSO- $d_6$ .

MS Zoomed Spectrum

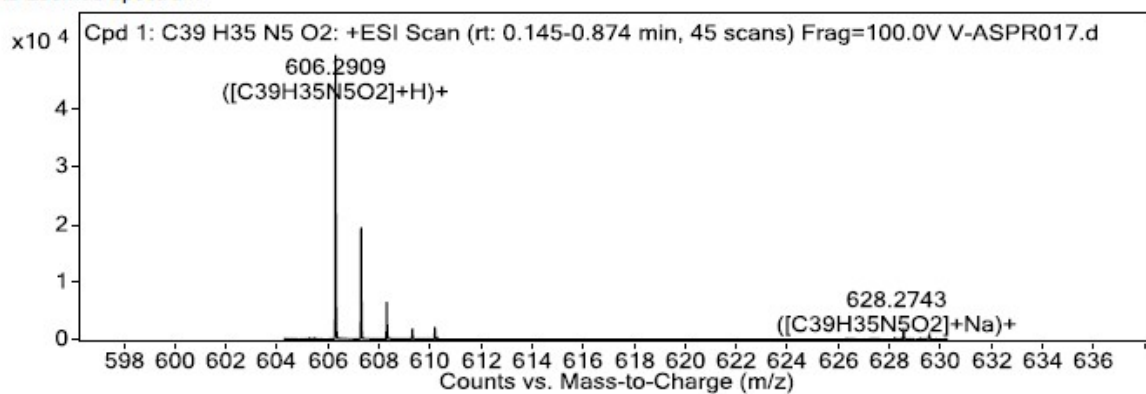

HRMS spectrum of compound **3i**.

<sup>1</sup>H NMR spectrum of compound **3j** in DMSO-d<sub>6</sub>.

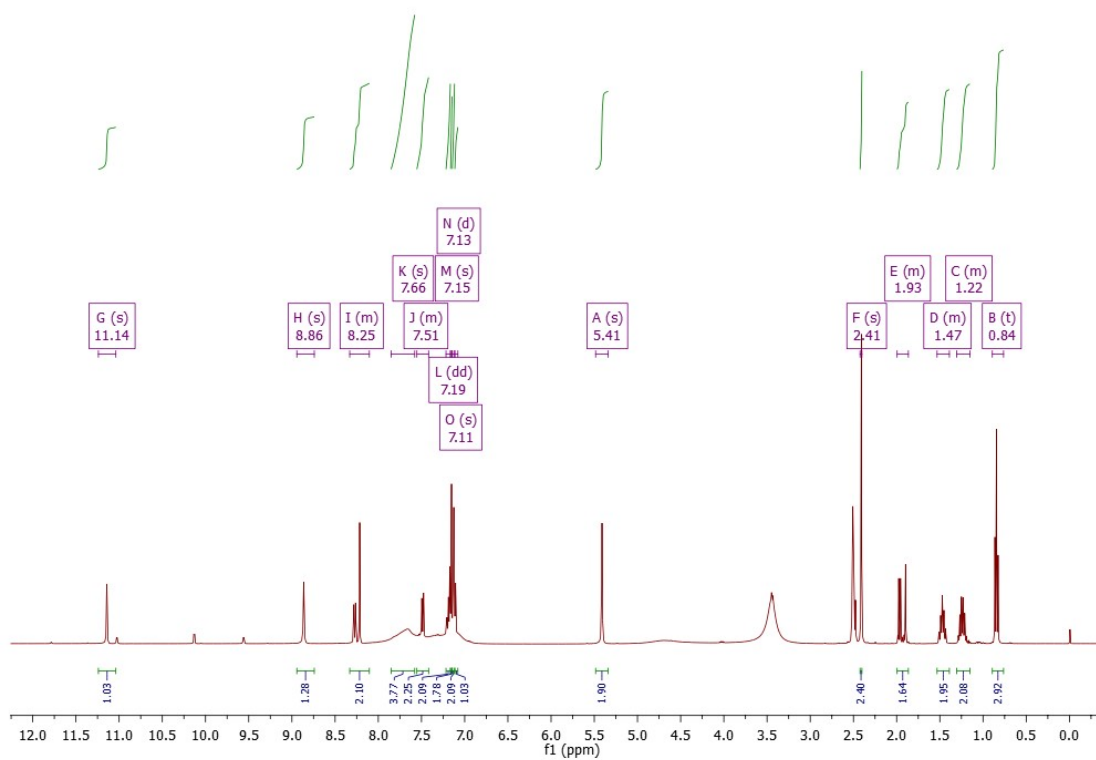

$^{13}\text{C}$

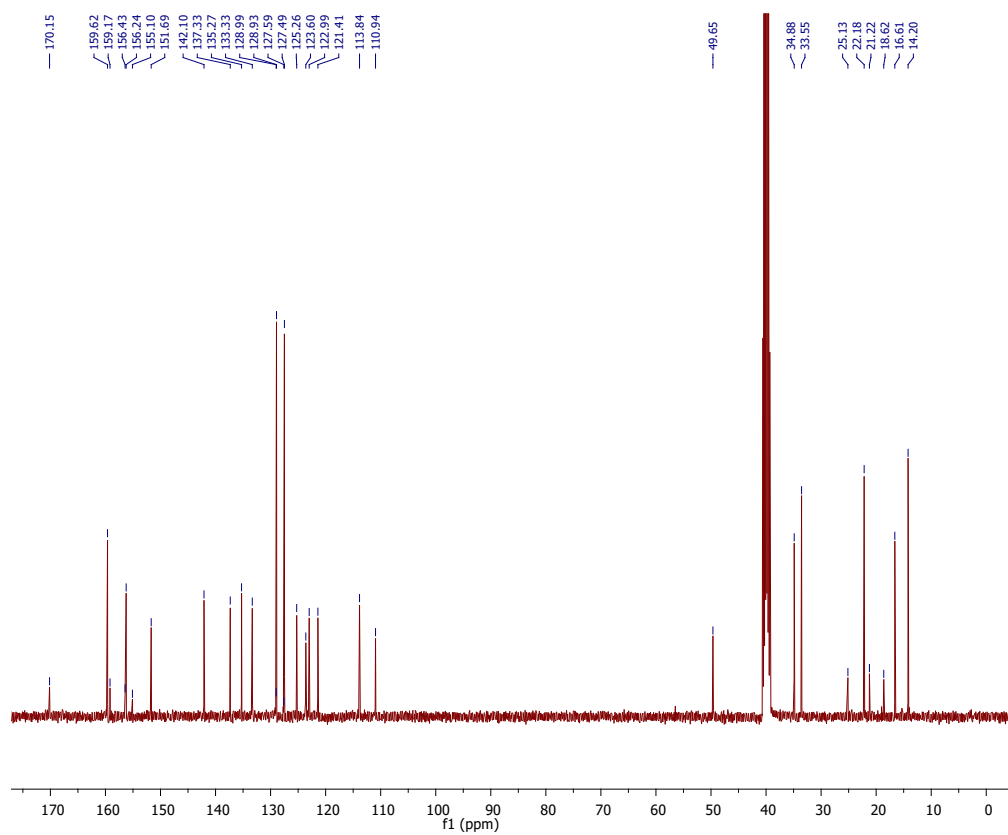

NMR spectrum of compound **3j** in DMSO- $\text{d}_6$ .



MS Zoomed Spectrum

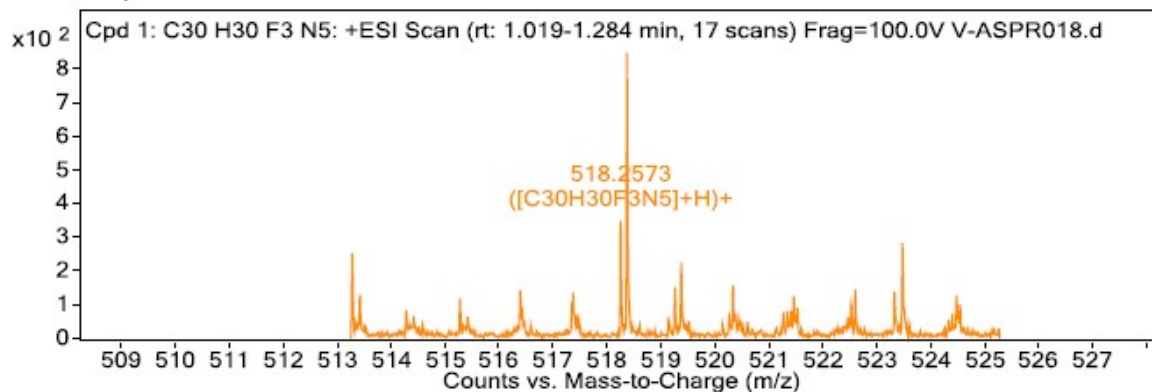

HRMS spectrum of compound **3j**.

<sup>1</sup>H NMR spectrum of compound **3k** in DMSO-d<sub>6</sub>.

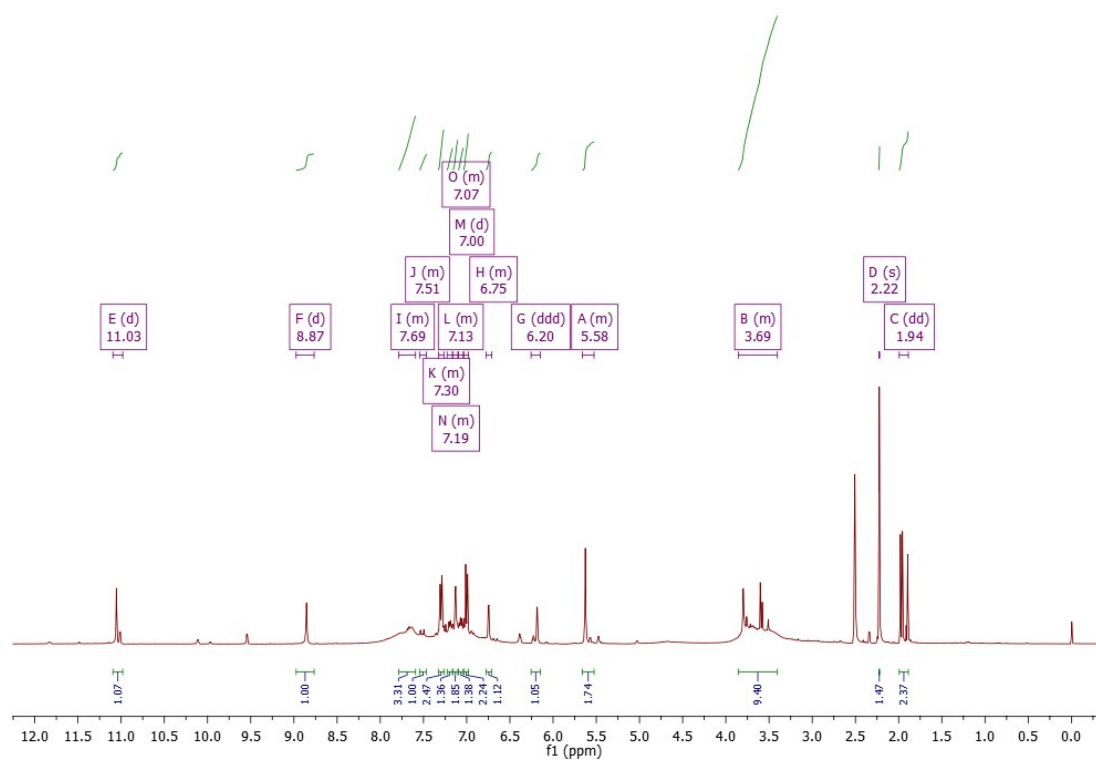

$^{13}\text{C}$

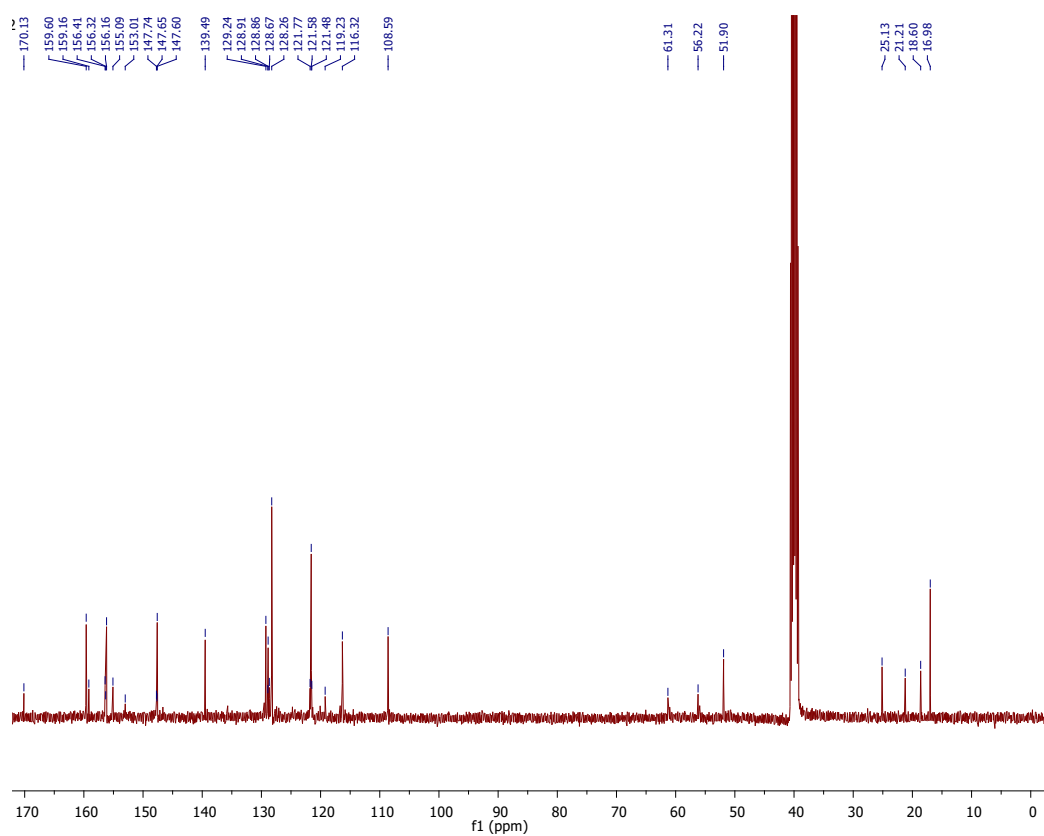

NMR spectrum of compound **3k** in  $\text{DMSO-d}_6$ .

HRMS spectrum of compound **3k**.

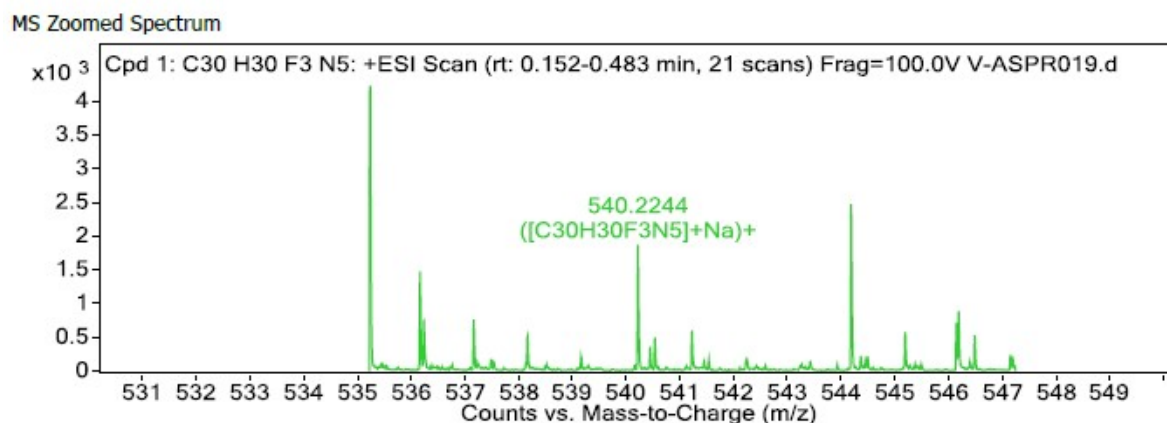

<sup>1</sup>H NMR spectrum of compound **3l** in DMSO-d<sub>6</sub>.

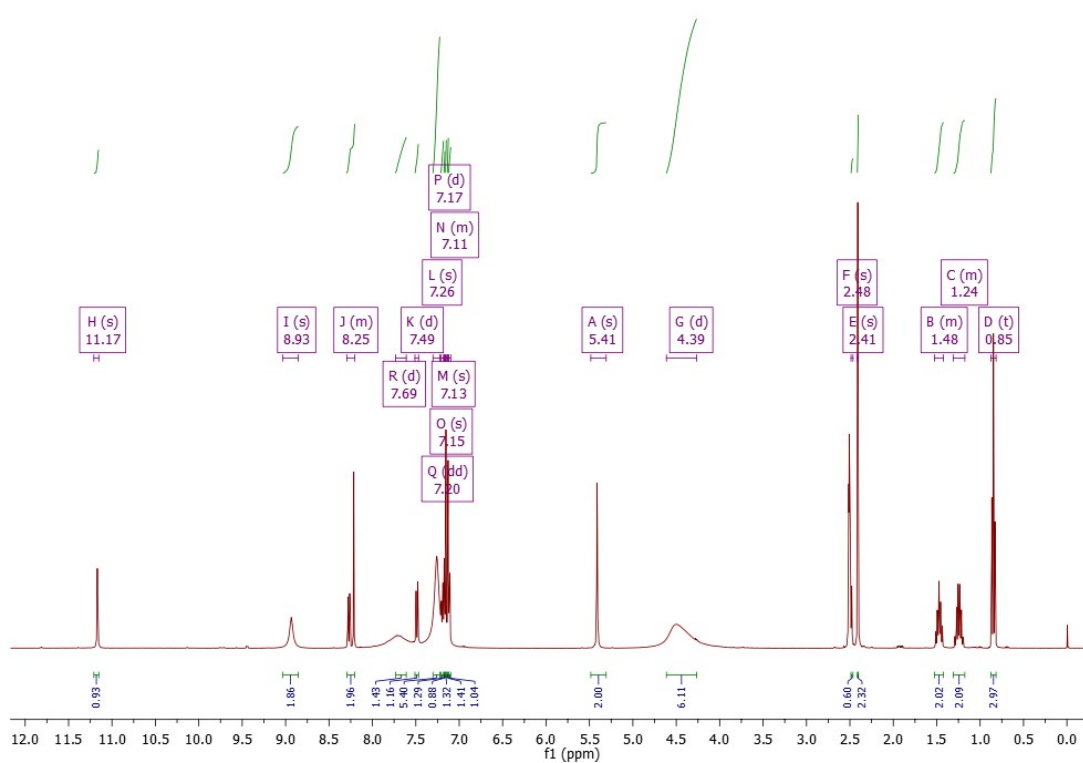

$^{13}\text{C}$

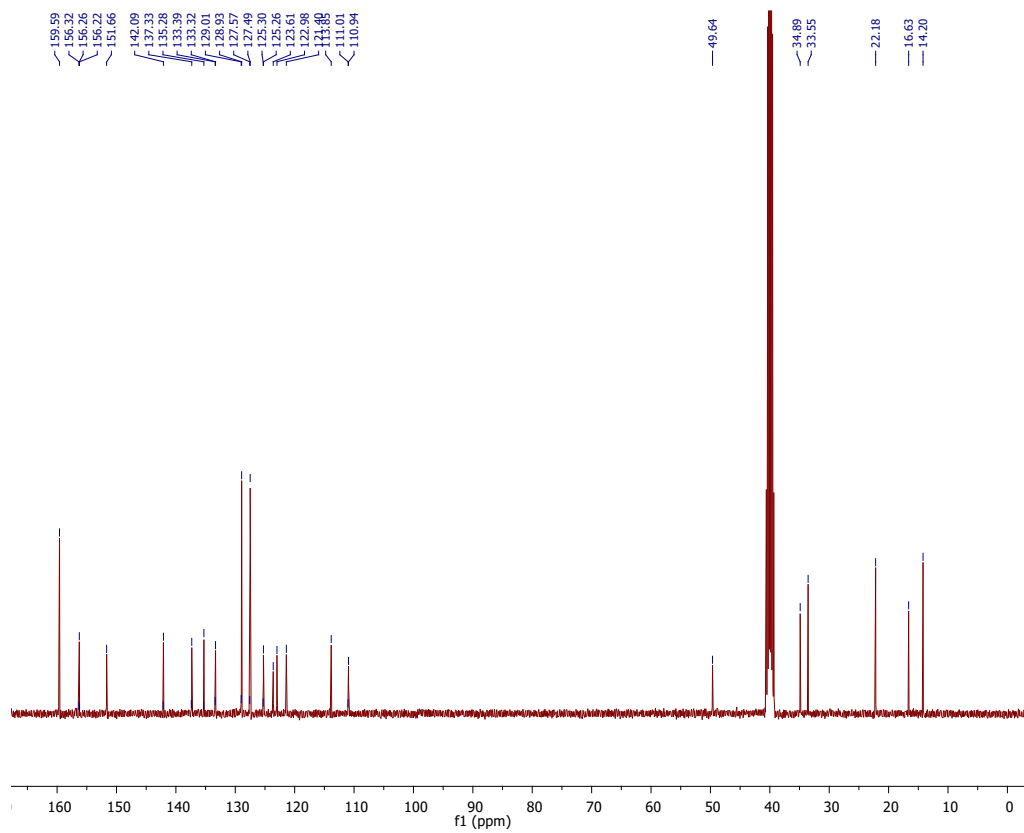

NMR spectrum of compound **31** in DMSO- $d_6$ .

MS Zoomed Spectrum

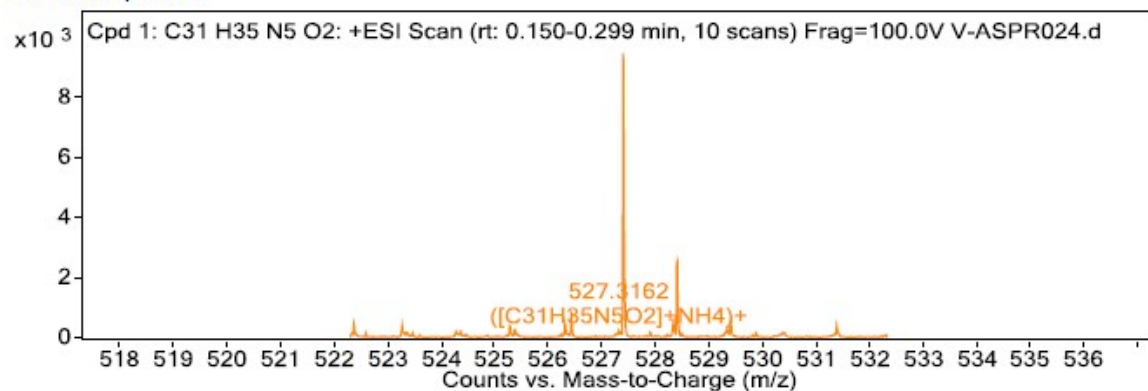

HRMS spectrum of compound **3l**.
